# Supplementary material for: CTGF promotes the repair and regeneration of alveoli after acute lung injury by promoting the proliferation of subpopulation of AEC2s
Source: Respir Res. 2023 Sep 23;24:227. doi: 10.1186/s12931-023-02512-4 (PMC10517460; doi:10.1186/s12931-023-02512-4)
Supplement: Supplementary file 6 — Additional file 6: Data file S1. The results of protein mass spectrometry of lung tissue post LPS-induced ALI [file 12931_2023_2512_MOESM6_ESM.xlsx]

## Sheet: ALI-D1 vs Sham-D1
Accession	Description	Coverage	# Peptides	# PSMs	# Unique Peptides	# Protein Groups	# AAs	MW [kDa]	calc. pI	19p	47p	20p	49p	21p	50p	emPAI	Score Mascot	# Peptides Mascot	Group_ALI_D1.average	Group_Sham_D1.average	Group_ALI_D1.call.percent	Group_Sham_D1.call.percent	Group_ALI_D1.vs.Group_Sham_D1.FC
P06238	Alpha-2-macroglobulin OS=Rattus norvegicus GN=A2m PE=2 SV=2	46.9429	55	373	19	1	1472	163.682	6.29	NA	NA	300000000	8100000	NA	NA	5.457	7867.93	55	300000000	8100000	0.333333	0.333333	0.998303
Q4VBH1	Ighg protein OS=Rattus norvegicus GN=Ighg PE=1 SV=1	26.7666	8	196	5	1	467	51.618	6.6	33000000	NA	450000000	8000000	NA	NA	3.489	3793.6	8	241500000	8000000	0.666667	0.333333	0.813679
Q920H8	Hephaestin OS=Rattus norvegicus GN=Heph PE=1 SV=1	1.1236	1	6	1	1	1157	129.511	6.15	73000000	NA	NA	NA	NA	2600000	0.034	29.5676	1	73000000	2600000	0.333333	0.333333	0.75679
D3ZRN3	Protein Actbl2 OS=Rattus norvegicus GN=Actbl2 PE=1 SV=1	24.2021	10	1555	3	1	376	41.936	5.49	5600000000	5100000000	2800000000	180000000	190000000	3500000000	4.878	33294.7	10	4500000000	1290000000	1	1	0.740926
G3V6D8	Myosin-3 OS=Rattus norvegicus GN=Myh3 PE=1 SV=1	14.8969	30	175	2	0	1940	223.647	5.81	NA	89000000	NA	NA	4500000	NA	0.66	3116.09	30	89000000	4500000	0.333333	0.333333	0.533094
B0BNC0	Ckmt2 protein OS=Rattus norvegicus GN=Ckmt2 PE=2 SV=1	44.6301	15	112	13	1	419	47.443	8.4	NA	85000000	NA	4700000	NA	NA	3.146	2258.44	15	85000000	4700000	0.333333	0.333333	0.487469
G3V617	Mitogen-activated protein kinase OS=Rattus norvegicus GN=Mapk14 PE=1 SV=1	24.7222	8	116	7	1	360	41.247	5.88	72000000	NA	3000000	7900000	11000000	4700000	3.642	647.802	2	57450000	3200000	0.666667	0.333333	0.483912
Q6P762	Alpha-mannosidase OS=Rattus norvegicus GN=Man2b1 PE=1 SV=1	8.6224	6	29	6	1	1009	114.255	8.66	NA	9300000	120000000	NA	NA	3800000	0.272	147.657	6	64650000	3800000	0.666667	0.333333	0.458576
P07483	Fatty acid-binding protein, heart OS=Rattus norvegicus GN=Fabp3 PE=1 SV=2	48.8722	6	45	6	1	133	14.766	6.33	NA	150000000	NA	16000000	7300000	NA	2.162	1070.94	6	150000000	11650000	0.333333	0.666667	0.34705
D3ZCV0	Protein Actn2 OS=Rattus norvegicus GN=Actn2 PE=1 SV=1	43.2886	33	619	20	1	894	103.768	5.45	NA	58000000	NA	4600000	NA	NA	3.495	13281	33	58000000	4600000	0.333333	0.333333	0.339857
A0A0G2K1G5	Transforming growth factor beta binding protein 2, isoform CRA_a OS=Rattus norvegicus GN=Ltbp2 PE=1 SV=1	7.80994	11	28	11	1	1831	196.993	5.29	NA	25000000	NA	9100000	1300000	6400000	0.719	1114.28	5	280000000	23000000	0.333333	0.333333	0.328138
D3ZRN3	Connective tissue growth factor OS=Rattus norvegicus PE=1 SV=1	24.2021	10	1555	3	1	376	41.936	5.49	140000000	4400000000	130000000	130000000	170000000	150000000	7.733	2271.54	10	410000000	35500000	0.333333	0.666667	0.311302
G3V615	Complement factor B, isoform CRA_b OS=Rattus norvegicus GN=Cfb PE=1 SV=1	49.1481	31	538	31	1	763	85.299	6.96	46000000	51000000	420000000	80000000	79000000	47000000	1.031	2859.79	2	130000000	12000000	0.333333	0.333333	0.292004
D3ZXA6	Protein Pdpr OS=Rattus norvegicus GN=Pdpr PE=1 SV=1	5.01139	4	40	4	1	878	98.756	6.48	110000000	7600000	NA	5700000	6900000	3700000	0.169	268.786	4	58800000	5.43333e+06	0.666667	1	0.2917
Q4G075	Leukocyte elastase inhibitor A OS=Rattus norvegicus GN=Serpinb1a PE=1 SV=1	47.4934	19	220	14	1	379	42.7	6.32	NA	8000000	360000000	17000000	26000000	9500000	9.857	4598.4	19	184000000	17500000	0.666667	1	0.283404
G3V885	Myosin-6 OS=Rattus norvegicus GN=Myh6 PE=1 SV=2	61.4035	119	840	33	1	1938	223.243	5.73	NA	480000000	NA	70000000	25000000	NA	8.866	16771.4	119	480000000	47500000	0.333333	0.666667	0.272379
A0A0H2UI19	Coagulation factor XII OS=Rattus norvegicus GN=F12 PE=1 SV=1	18.0763	10	37	10	1	603	66.674	7.3	10000000	7400000	18000000	5700000	NA	NA	7.979	15524.3	114	480000000	47500000	0.333333	0.666667	0.272379
Q5I0E1	Leucine-rich alpha-2-glycoprotein 1 OS=Rattus norvegicus GN=Lrg1 PE=2 SV=1	18.3735	5	22	5	1	332	36.297	7.23	NA	NA	21000000	NA	2100000	NA	0.778	351.493	5	21000000	2100000	0.333333	0.333333	0.269542
P50753	Troponin T, cardiac muscle OS=Rattus norvegicus GN=Tnnt2 PE=1 SV=2	30.7692	8	42	8	1	299	35.709	4.98	NA	55000000	NA	6200000	5000000	NA	3.642	826.443	8	55000000	5600000	0.333333	0.666667	0.264729
F1LNL2	Protein Smarca5 OS=Rattus norvegicus GN=Smarca5 PE=1 SV=2	11.5578	10	48	10	1	995	116.581	8.41	NA	7800000	2200000	6600000	30000000	4000000	1.565	760.04	6	99000000	10150000	0.333333	0.666667	0.262903
D3ZZT9	Protein Col14a1 OS=Rattus norvegicus GN=Col14a1 PE=1 SV=3	15.3846	21	55	21	1	1794	192.445	5.22	NA	34000000	NA	5000000	NA	2800000	0.572	685.625	21	34000000	3900000	0.333333	0.666667	0.234985
F1LR92	Serine protease inhibitor A3M OS=Rattus norvegicus GN=Serpina3m PE=1 SV=3	26.969	10	60	9	1	419	46.811	5.66	5300000	NA	25000000	2600000	NA	900000	1.371	1002.82	10	15150000	1750000	0.666667	0.666667	0.233346
F1M944	Calsequestrin OS=Rattus norvegicus GN=Casq2 PE=1 SV=2	12.6464	5	12	5	1	427	49.372	4.31	NA	30000000	NA	3600000	NA	NA	0.532	100.725	5	30000000	3600000	0.333333	0.333333	0.224618
G3V7U0	Cysteine and glycine-rich protein 3 OS=Rattus norvegicus GN=Csrp3 PE=1 SV=1	38.1443	7	42	6	1	194	20.848	8.54	40000000	63000000	14000000	4800000	NA	NA	2.162	623.346	7	39000000	4800000	1	0.333333	0.219003
B2GVB3	Actn3 protein OS=Rattus norvegicus GN=Actn3 PE=2 SV=1	12.8889	11	329	1	0	900	102.978	5.45	NA	55000000	NA	6900000	NA	NA	0.555	6948.22	11	55000000	6900000	0.333333	0.333333	0.214852
F1M614	Protein Lama2 OS=Rattus norvegicus GN=Lama2 PE=1 SV=3	4.80615	12	58	12	1	3121	343.637	6.19	73000000	48000000	NA	8300000	9100000	5600000	0.134	630.878	12	60500000	7.66667e+06	0.666667	1	0.212704
A0A0H2UHF8	Alpha-1-acid glycoprotein OS=Rattus norvegicus GN=Orm1 PE=1 SV=1	30.2128	7	294	7	1	235	26.694	6.54	37000000	69000000	1600000000	28000000	160000000	32000000	5.494	5437.55	7	5.68667e+08	7.33333e+07	1	1	0.209017
D3ZFP4	DNA helicase OS=Rattus norvegicus GN=Mcm3 PE=1 SV=3	15.6212	10	31	10	1	813	91.602	5.48	NA	5900000	150000000	12000000	9900000	NA	0.436	273.512	10	77950000	10950000	0.666667	0.666667	0.191879
Q5M891	C4b-binding protein alpha chain OS=Rattus norvegicus GN=C4bpa PE=1 SV=1	31.7804	17	78	17	1	601	67.158	7.78	NA	NA	75000000	9400000	13000000	NA	1.488	771.208	17	75000000	11200000	0.333333	0.666667	0.180497
D4A4K4	Protein Vps13c OS=Rattus norvegicus GN=Vps13c PE=1 SV=2	2.24659	7	32	7	1	3739	418.359	6.84	10000000	19000000	76000000	NA	3600000	6900000	0.058	134.562	7	35000000	5250000	1	0.666667	0.179695
A0A0G2JSP8	Creatine kinase M-type OS=Rattus norvegicus GN=Ckm PE=1 SV=1	52.4934	14	70	13	1	381	42.992	7.06	NA	110000000	6800000	8900000	NA	NA	2.282	1319.34	14	58400000	8900000	0.666667	0.333333	0.176868
Q6W3E4	Inositol trisphosphate receptor type 2 OS=Rattus norvegicus GN=Itpr2 PE=2 SV=1	2.77675	8	23	1	1	2701	306.721	6.44	3000000	NA	NA	NA	NA	470000	0.093	134.669	8	3000000	470000	0.333333	0.333333	0.172048
P14480	Fibrinogen beta chain OS=Rattus norvegicus GN=Fgb PE=1 SV=4	67.2234	30	762	30	1	479	54.201	7.78	42000000	50000000	1400000000	84000000	100000000	52000000	19.691	12509.1	30	4.97333e+08	7.86667e+07	1	1	0.170405
Q63583	Hepatoma alpha tropomyosin OS=Rattus norvegicus PE=3 SV=1	67.2535	27	847	3	0	284	32.85	4.83	NA	94000000	NA	15000000	NA	NA	10.365	15043.5	27	94000000	15000000	0.333333	0.333333	0.168913
Q7TQ70	Ac1873 OS=Rattus norvegicus GN=Fga PE=1 SV=1	45.5243	30	534	30	1	782	86.603	5.74	56000000	67000000	1700000000	110000000	130000000	55000000	5.646	9971.57	30	6.07667e+08	9.83333e+07	1	1	0.166568
P02680	Fibrinogen gamma chain OS=Rattus norvegicus GN=Fgg PE=1 SV=3	62.6966	26	731	26	1	445	50.6	5.96	54000000	63000000	1600000000	110000000	120000000	48000000	19.209	15840.6	26	5.72333e+08	9.26667e+07	1	1	0.166476
P01015	Angiotensinogen OS=Rattus norvegicus GN=Agt PE=1 SV=1	40.4612	16	85	16	1	477	51.949	5.57	6500000	9800000	120000000	NA	7400000	NA	4.505	1369.76	16	4.54333e+07	7400000	1	0.333333	0.165489
P14141	Carbonic anhydrase 3 OS=Rattus norvegicus GN=Ca3 PE=1 SV=3	65.7692	11	59	11	1	260	29.413	7.37	NA	43000000	NA	6700000	7400000	NA	5.661	619.359	11	43000000	7050000	0.333333	0.666667	0.164401
Q62714	Neutrophil antibiotic peptide NP-4 OS=Rattus norvegicus GN=Np4 PE=1 SV=1	31.1828	3	31	3	1	93	10.103	7.65	33000000	30000000	280000000	NA	NA	19000000	1.683	409.187	3	1.14333e+08	19000000	1	0.333333	0.162198
Q7TT49	Serine/threonine-protein kinase MRCK beta OS=Rattus norvegicus GN=Cdc42bpb PE=1 SV=1	3.61938	5	43	5	1	1713	194.765	6.46	71000000	3900000	NA	7500000	6400000	4900000	0.088	248.842	5	37450000	6.26667e+06	0.666667	1	0.16108
A0A0G2JZS9	Uncharacterized protein OS=Rattus norvegicus PE=1 SV=1	26.8041	2	12	2	1	97	10.804	4.97	NA	8200000	49000000	NA	5000000	NA	0.931	511.046	2	28600000	5000000	0.666667	0.333333	0.154178
P06907	Myelin protein P0 OS=Rattus norvegicus GN=Mpz PE=1 SV=1	16.5323	4	7	4	1	248	27.553	9.36	NA	52000000	NA	9100000	NA	NA	0.668	85.3409	4	52000000	9100000	0.333333	0.333333	0.154024
P20291	Arachidonate 5-lipoxygenase-activating protein OS=Rattus norvegicus GN=Alox5ap PE=1 SV=2	10.559	2	28	2	1	161	18.059	8.46	10000000	NA	55000000	NA	NA	5700000	0.585	424.096	2	32500000	5700000	0.666667	0.333333	0.153686
Q8K597	Protein Prtn3 OS=Rattus norvegicus GN=Prtn3 PE=4 SV=1	41.7323	6	89	6	1	254	27.664	7.97	3500000	NA	55000000	NA	7200000	3100000	3.642	1680.45	6	29250000	5150000	0.666667	0.666667	0.153089
F1M3X3	Protein Ighv4-1 OS=Rattus norvegicus GN=Ighv4-1 PE=1 SV=2	23.0769	2	9	2	1	117	13.006	8.6	NA	NA	87000000	NA	19000000	13000000	0.52	139.879	2	87000000	16000000	0.333333	0.666667	0.146563
A0A0G2K929	Protein Cep290 OS=Rattus norvegicus GN=Cep290 PE=4 SV=1	0.253991	1	17	1	1	2756	320.536	6.24	65000000	5600000	NA	6000000	7300000	NA	0.008	69.1859	1	35300000	6650000	0.666667	0.666667	0.14308
Q4V8K1	Metalloreductase STEAP4 OS=Rattus norvegicus GN=Steap4 PE=1 SV=1	15.1064	6	34	6	1	470	52.731	9.13	NA	NA	12000000	1600000	3000000	NA	0.54	327.183	6	12000000	2300000	0.333333	0.666667	0.14063
P17209	Myosin light chain 4 OS=Rattus norvegicus GN=Myl4 PE=2 SV=2	66.3212	14	111	2	1	193	21.269	5.03	NA	270000000	NA	75000000	29000000	NA	9	2557.53	14	270000000	52000000	0.333333	0.666667	0.139954
A0A096P6L9	Complement C5 OS=Rattus norvegicus GN=C5 PE=1 SV=2	20.9994	27	64	27	1	1681	188.961	6.62	NA	NA	29000000	7400000	3800000	NA	0.729	486.433	27	29000000	5600000	0.333333	0.666667	0.139584
F1LPQ6	Protein Ighm OS=Rattus norvegicus GN=Ighm PE=4 SV=2	24.359	8	222	5	0	468	51.637	6.77	30000000	29000000	450000000	52000000	32000000	15000000	3.217	4366.2	8	1.69667e+08	33000000	1	1	0.138583
G3V9Q7	Cathepsin G OS=Rattus norvegicus GN=Ctsg PE=1 SV=1	56	11	164	11	1	250	27.786	10.54	9900000	14000000	160000000	NA	18000000	6500000	14.849	3668	11	61300000	12250000	1	0.666667	0.134881
Q6P734	Plasma protease C1 inhibitor OS=Rattus norvegicus GN=Serping1 PE=2 SV=1	33.3333	12	80	12	1	504	55.576	5.83	5800000	9300000	76000000	10000000	5800000	2800000	1.762	1434.4	12	3.03667e+07	6200000	1	1	0.132018
F7EPZ4	Protein Dis3 OS=Rattus norvegicus GN=Dis3 PE=1 SV=1	3.12195	3	11	3	1	1025	116.709	7.97	NA	15000000	1500000	NA	NA	1700000	0.055	75.7624	3	8250000	1700000	0.666667	0.333333	0.130807
M0R8B5	Protein RGD1563231 OS=Rattus norvegicus GN=RGD1563231 PE=4 SV=2	30.8333	2	17	2	1	120	12.924	4.56	NA	4900000	110000000	NA	NA	3200000	1.512	875.038	8	37500000	7.86667e+06	0.666667	1	0.128489
A0A0G2K9B1	Protein LOC299282 OS=Rattus norvegicus GN=LOC299282 PE=1 SV=1	43.75	19	408	19	1	432	48.342	5.57	33000000	32000000	830000000	50000000	110000000	29000000	7.733	8421.22	19	2.98333e+08	63000000	1	1	0.12764
P50115	Protein S100-A8 OS=Rattus norvegicus GN=S100a8 PE=1 SV=3	58.427	6	406	6	1	89	10.232	6.05	400000000	360000000	7700000000	210000000	1300000000	290000000	20.544	8213.79	6	2820000000	600000000	1	1	0.126685
Q03626	Murinoglobulin-1 OS=Rattus norvegicus GN=Mug1 PE=2 SV=1	41.6274	50	1530	11	1	1487	165.221	6.01	31000000	37000000	270000000	37000000	15000000	20000000	9.502	26404.9	50	1.12667e+08	24000000	1	1	0.126535
Q7TMC3	Aa2-028 OS=Rattus norvegicus GN=Saa4 PE=1 SV=1	5.3012	4	23	4	1	830	92.782	5.43	5200000	NA	83000000	NA	9500000	NA	0.264	247.802	4	44100000	9500000	0.666667	0.333333	0.125124
A0A0G2K1T8	Protein LOC299282 OS=Rattus norvegicus GN=LOC299282 PE=1 SV=1	46.6346	15	422	12	0	416	46.276	5.08	68000000	62000000	690000000	70000000	84000000	25000000	7.003	9704.59	15	2.73333e+08	5.96667e+07	1	1	0.123477
D3ZBS2	Inter-alpha-trypsin inhibitor heavy chain H3 OS=Rattus norvegicus GN=Itih3 PE=1 SV=3	27.283	18	183	18	1	887	99.006	6.32	16000000	16000000	230000000	27000000	23000000	7200000	1.512	2648.41	18	8.73333e+07	1.90667e+07	1	1	0.123461
B0BNN3	Carbonic anhydrase 1 OS=Rattus norvegicus GN=Ca1 PE=1 SV=1	60.9195	11	104	11	1	261	28.282	7.42	NA	11000000	75000000	8000000	11000000	NA	6.499	1549.5	11	43000000	9500000	0.666667	0.666667	0.122003
G3V7N9	Complement C1q subcomponent subunit B OS=Rattus norvegicus GN=C1qb PE=1 SV=1	4.74308	1	4	1	1	253	26.631	8.82	NA	NA	18000000	NA	4000000	NA	0.155	119.665	1	18000000	4000000	0.333333	0.333333	0.121294
F1M8F5	Protein LOC100909605 OS=Rattus norvegicus GN=LOC100909605 PE=3 SV=3	11.9512	5	55	4	0	410	46.328	7.8	NA	NA	280000000	NA	23000000	NA	0.321	222.869	11	25000000	5600000	0.333333	1	0.120331
F8WFT7	Anion exchange protein OS=Rattus norvegicus GN=Slc4a1 PE=1 SV=1	7.5431	7	42	7	1	928	103.178	5.41	3800000	6300000	18000000	2000000	2200000	NA	0.409	482.807	7	9.36667e+06	2100000	1	0.666667	0.120224
A0A0G2JY12	Paxillin OS=Rattus norvegicus GN=Pxn PE=1 SV=1	30.8874	15	292	15	1	586	64.017	6.39	300000000	29000000	17000000	30000000	32000000	16000000	1.985	6339.26	15	1.15333e+08	26000000	1	1	0.119566
F1LRA5	Phospholipid phosphatase-related protein type 2 OS=Rattus norvegicus GN=Prg4 PE=1 SV=2	4.5283	1	5	1	1	1060	115.743	8.97	NA	NA	44000000	NA	NA	10000000	0.025	46.1276	1	44000000	10000000	0.333333	0.333333	0.118598
D4A6E3	Protein LOC297568 OS=Rattus norvegicus GN=Mug1 PE=1 SV=2	41.0894	49	1520	10	0	1487	165.221	6.01	31000000	35000000	250000000	37000000	15000000	20000000	9.248	26465.6	49	1.05333e+08	24000000	1	1	0.118299
A0A0G2K625	Protein LOC297568 OS=Rattus norvegicus GN=Mug1 PE=1 SV=1	39.0463	47	1472	6	0	1447	160.9	6.25	31000000	35000000	250000000	37000000	15000000	20000000	8.522	26051.2	47	1.05333e+08	24000000	1	1	0.118299
P14272	Plasma kallikrein OS=Rattus norvegicus GN=Klkb1 PE=1 SV=1	12.069	7	16	6	1	638	71.227	8.07	NA	NA	14000000	3200000	NA	NA	0.445	196.115	7	14000000	3200000	0.333333	0.333333	0.117925
Q5EBC0	Inter alpha-trypsin inhibitor, heavy chain 4 OS=Rattus norvegicus GN=Itih4 PE=1 SV=1	54.5552	39	528	39	1	933	103.691	6.2	43000000	38000000	410000000	52000000	47000000	18000000	6.804	8048.83	39	1.63667e+08	39000000	1	1	0.113115
B0BNL2	Peptidylprolyl isomerase OS=Rattus norvegicus GN=Pin1 PE=1 SV=1	21.2121	3	14	3	1	165	18.321	8.82	NA	38000000	NA	12000000	11000000	4200000	0.701	104.996	3	38000000	9.06667e+06	0.333333	1	0.11297
D3ZDB9	NmrA-like family domain-containing protein 1 OS=Rattus norvegicus GN=Nmral1 PE=1 SV=2	8.85246	2	6	2	1	305	33.93	6.62	3600000	8900000	NA	NA	NA	1500000	0.194	28.8766	2	6250000	1500000	0.666667	0.333333	0.112309
Q01129	Decorin OS=Rattus norvegicus GN=Dcn PE=1 SV=1	36.7232	13	218	12	1	354	39.78	8.79	32000000	240000000	19000000	30000000	28000000	12000000	2.562	2300.27	13	97000000	2.33333e+07	1	1	0.112052
Q3KR94	Protein Vtn OS=Rattus norvegicus GN=Vtn PE=1 SV=1	29.9163	11	176	11	1	478	54.69	6.05	20000000	16000000	150000000	18000000	17000000	10000000	2.415	3392.85	11	62000000	15000000	1	1	0.111411
D3ZTL0	Protein Tcerg1 OS=Rattus norvegicus GN=Tcerg1 PE=1 SV=1	7.21554	7	37	7	1	1081	121.774	8.65	NA	30000000	NA	7000000	8100000	NA	0.217	160.59	7	30000000	7550000	0.333333	0.666667	0.107103
O35293	Cytochrome P450 2F2 OS=Rattus norvegicus GN=Cyp2f2 PE=2 SV=1	12.831	6	13	6	1	491	55.91	7.84	NA	11000000	NA	NA	2800000	NA	0.484	217.361	6	11000000	2800000	0.333333	0.333333	0.105891
A0A0G2K477	Protein Ighm OS=Rattus norvegicus GN=Ighm PE=4 SV=1	30.0429	9	238	7	0	466	51.104	7.74	30000000	28000000	450000000	73000000	37000000	20000000	2.29	4660.41	9	1.69333e+08	4.33333e+07	1	1	0.105329
P08932	T-kininogen 2 OS=Rattus norvegicus PE=1 SV=2	65.814	23	798	8	1	430	47.673	6.35	10000000	18000000	670000000	48000000	110000000	22000000	28.427	16310.3	23	2.32667e+08	60000000	1	1	0.104522
A0A0H2UHJ1	Protein S100-A9 OS=Rattus norvegicus GN=S100a9 PE=1 SV=1	69.9248	10	595	10	1	133	15.21	8.05	310000000	250000000	3900000000	140000000	830000000	190000000	9	6640.19	10	1.48667e+09	3.86667e+08	1	1	0.103634
D3ZZW1	Protein Dock1 OS=Rattus norvegicus GN=Dock1 PE=1 SV=1	4.39914	7	22	6	1	1864	214.829	7.53	3800000	28000000	NA	5100000	NA	3200000	0.118	295.108	7	15900000	4150000	0.666667	0.666667	0.10327
Q71SA3	Thrombospondin 1 OS=Rattus norvegicus GN=Thbs1 PE=2 SV=1	30.1709	28	161	28	1	1170	129.588	4.97	11000000	9200000	84000000	13000000	9900000	4700000	1.236	3031.91	28	3.47333e+07	9200000	1	1	0.101762
A0A0G2JUP5	Protein LOC297568 OS=Rattus norvegicus GN=Mug1 PE=1 SV=1	38.8966	44	1419	5	0	1450	161.262	6.33	31000000	31000000	250000000	37000000	15000000	31000000	7.237	24927.1	44	104000000	2.76667e+07	1	1	0.101322
P30152	Neutrophil gelatinase-associated lipocalin OS=Rattus norvegicus GN=Lcn2 PE=1 SV=2	19.1919	3	54	3	1	198	22.461	7.83	NA	NA	270000000	NA	72000000	NA	1.424	639.852	3	270000000	72000000	0.333333	0.333333	0.101078
D3ZFY0	Protein Sephs1 OS=Rattus norvegicus GN=Sephs1 PE=1 SV=1	25.2551	6	69	6	1	392	42.865	5.97	89000000	18000000	NA	14000000	19000000	10000000	1.154	784.898	6	53500000	1.43333e+07	0.666667	1	0.100608
Q63910	Alpha globin OS=Rattus norvegicus GN=Hba-a3 PE=1 SV=2	61.2676	8	193	6	1	142	15.515	8.22	6100000	10000000	27000000	3700000	4000000	NA	9	1233.24	8	1.43667e+07	3850000	1	0.666667	0.100582
P06866	Haptoglobin OS=Rattus norvegicus GN=Hp PE=1 SV=3	52.1614	20	588	20	1	347	38.539	6.54	110000000	120000000	2400000000	210000000	430000000	76000000	9.857	9420.12	20	8.76667e+08	2.38667e+08	1	1	0.0990077
A0A0G2JWA5	Sarcolemmal membrane-associated protein OS=Rattus norvegicus GN=Slmap PE=1 SV=1	5.07426	4	30	4	1	808	92.895	5.26	300000000	290000000	NA	14000000	220000000	8000000	0.122	488.798	4	295000000	8.06667e+07	0.666667	1	0.0985721
D3ZY96	Neutrophilic granule protein (Predicted) OS=Rattus norvegicus GN=Ngp PE=1 SV=1	68.4524	15	267	15	1	168	19.369	8.02	61000000	35000000	350000000	37000000	61000000	25000000	24.119	4917.45	15	1.48667e+08	41000000	1	1	0.0977363
B2RYM3	Inter-alpha trypsin inhibitor, heavy chain 1 (Predicted), isoform CRA_a OS=Rattus norvegicus GN=Itih1 PE=1 SV=1	21.0177	14	54	14	1	904	100.526	6.86	6600000	2800000	57000000	7800000	5700000	4900000	0.778	1316.74	14	2.21333e+07	6.13333e+06	1	1	0.0972694
P06686	Sodium/potassium-transporting ATPase subunit alpha-2 OS=Rattus norvegicus GN=Atp1a2 PE=1 SV=1	19.8039	18	375	3	1	1020	112.145	5.55	NA	18000000	NA	NA	5000000	NA	0.976	6591.94	18	18000000	5000000	0.333333	0.333333	0.097035
P20059	Hemopexin OS=Rattus norvegicus GN=Hpx PE=1 SV=3	61.3043	25	1986	25	1	460	51.318	7.65	270000000	410000000	3700000000	500000000	530000000	190000000	15.927	44319.3	25	1460000000	4.06667e+08	1	1	0.0967699
Q4G063	Cysteine-rich with EGF-like domain protein 2 OS=Rattus norvegicus GN=Creld2 PE=1 SV=1	15.1862	5	45	5	1	349	38.225	4.56	9800000	13000000	160000000	14000000	20000000	NA	0.778	575.045	5	6.09333e+07	17000000	1	0.666667	0.0966122
Q7TP52	Carboxymethylenebutenolidase homolog OS=Rattus norvegicus GN=Cmbl PE=2 SV=1	8.97959	2	11	2	1	245	27.885	6.71	NA	12000000	NA	4000000	4100000	2100000	0.334	133.388	2	12000000	3400000	0.333333	1	0.0951324
G3V7D0	Matrix metallopeptidase 8 OS=Rattus norvegicus GN=Mmp8 PE=1 SV=1	27.0386	9	45	9	1	466	53.229	6.64	NA	NA	13000000	NA	3700000	NA	1.043	718.891	9	13000000	3700000	0.333333	0.333333	0.0947039
P08009	Glutathione S-transferase Yb-3 OS=Rattus norvegicus GN=Gstm3 PE=1 SV=2	54.5872	13	393	3	1	218	25.664	7.33	20000000	26000000	NA	NA	NA	6600000	5.579	7234.21	13	23000000	6600000	0.666667	0.333333	0.0939312
Q7TMB9	Ab1-021 OS=Rattus norvegicus GN=LOC299282 PE=2 SV=1	38.4615	18	508	13	0	611	68.18	5.45	100000000	150000000	470000000	98000000	74000000	38000000	3.566	10899.6	18	240000000	70000000	1	1	0.0924143
Q5PQU1	Kininogen 1 OS=Rattus norvegicus GN=Kng1 PE=2 SV=1	49.7674	18	716	7	1	430	47.734	6.74	26000000	57000000	1500000000	140000000	270000000	52000000	25.827	15634.9	18	5.27667e+08	154000000	1	1	0.092356
Q63581	Rat T-kininogen (T-KG) OS=Rattus norvegicus PE=4 SV=1	41.8605	16	626	5	0	430	47.588	6.52	23000000	45000000	1500000000	140000000	270000000	52000000	11.69	14597.9	16	5.22667e+08	154000000	1	1	0.0914808
G3V8V3	Alpha-1,4 glucan phosphorylase OS=Rattus norvegicus GN=Pygm PE=1 SV=1	47.8622	36	296	23	1	842	97.227	7.11	4200000	46000000	NA	12000000	5800000	4400000	2.652	3783.35	36	25100000	7400000	0.666667	1	0.0914257
B1H241	Resistance to inhibitors of cholinesterase 8 homolog A (C. elegans) OS=Rattus norvegicus GN=Ric8a PE=1 SV=1	1.50943	1	11	1	1	530	59.789	5.68	NA	4700000	NA	NA	NA	1400000	0.058	104.665	1	4700000	1400000	0.333333	0.333333	0.090489
Q5I0J8	PHD finger protein 11-like OS=Rattus norvegicus GN=Phf11l PE=2 SV=1	3.41297	1	2	1	1	293	32.545	5.34	NA	7700000	NA	NA	NA	2300000	0.11	47.96	1	7700000	2300000	0.333333	0.333333	0.0902379
P20767	Ig lambda-2 chain C region OS=Rattus norvegicus PE=4 SV=1	46.1538	4	97	4	1	104	11.311	5.99	29000000	28000000	170000000	10000000	48000000	10000000	3.217	1361.21	4	7.56667e+07	2.26667e+07	1	1	0.0899794
Q7TP58	Ab2-098 OS=Rattus norvegicus GN=Bpgm PE=1 SV=1	2.78481	1	3	1	1	395	45.334	6.92	NA	NA	28000000	NA	8400000	NA	0.077	0	1	28000000	8400000	0.333333	0.333333	0.0898473
B0BNL5	Receptor expression-enhancing protein OS=Rattus norvegicus GN=Reep3 PE=2 SV=1	7.48031	2	3	2	1	254	29.181	9.58	NA	4600000	NA	NA	NA	1400000	0.311	21.19	2	4600000	1400000	0.333333	0.333333	0.0885637
A0A0G2JVA8	Protein Kb15 OS=Rattus norvegicus GN=Kb15 PE=3 SV=1	12.1043	8	187	1	0	537	58.06	7.9	45000000	NA	NA	NA	NA	14000000	0.52	1940.39	8	45000000	14000000	0.333333	0.333333	0.0866384
Q5M8A0	Kng2 protein OS=Rattus norvegicus GN=Kng2 PE=2 SV=1	33.7182	13	207	1	1	433	47.861	6.39	11000000	NA	250000000	29000000	53000000	NA	2.162	3809.85	13	130500000	41000000	0.666667	0.666667	0.0857932
M0R5V7	Murinoglobulin-2 OS=Rattus norvegicus GN=Mug2 PE=1 SV=2	33.4066	35	1093	5	0	1365	151.867	6.77	16000000	21000000	120000000	24000000	NA	9100000	3.68	19416.8	35	5.23333e+07	16550000	1	0.666667	0.0852327
A0A0G2JTP7	E3 ubiquitin-protein ligase RING2 OS=Rattus norvegicus GN=Rnf2 PE=1 SV=1	15.7738	3	3	3	1	336	37.6	6.84	NA	10000000	NA	NA	3200000	NA	0.318	0	3	10000000	3200000	0.333333	0.333333	0.0842318
D3ZFH5	Protein Itih2 OS=Rattus norvegicus GN=Itih2 PE=1 SV=3	27.724	17	131	17	1	826	92.311	6.7	8500000	16000000	84000000	15000000	11000000	9200000	1.492	2367.98	17	3.61667e+07	1.17333e+07	1	1	0.0830832
H6X2V7	Pentaxin OS=Rattus norvegicus GN=crp PE=3 SV=1	35.2174	5	107	5	1	230	25.45	5.11	47000000	53000000	380000000	64000000	73000000	21000000	6.943	1680.95	5	160000000	5.26667e+07	1	1	0.0818861
Q9R290	Adipocyte lipid-binding protein OS=Rattus norvegicus GN=Fabp4 PE=2 SV=1	40.6667	6	48	6	1	150	16.457	9.01	NA	82000000	NA	30000000	37000000	14000000	1.738	633.106	6	82000000	27000000	0.333333	1	0.0818608
D4A488	Elastase 2, neutrophil (Predicted) OS=Rattus norvegicus GN=Elane PE=1 SV=1	28.4133	8	100	8	1	271	29.538	9.28	9200000	NA	130000000	NA	23000000	NA	6.017	2366.07	8	69600000	23000000	0.666667	0.333333	0.0815657
A0A0G2JTA1	Protein Ppp2r5e OS=Rattus norvegicus GN=Ppp2r5e PE=1 SV=1	11.9914	5	52	4	1	467	54.679	6.95	9800000	NA	NA	4300000	NA	2200000	0.528	662.439	5	9800000	3250000	0.333333	0.666667	0.0812772
A0A0G2K3Q6	Fructose-bisphosphate aldolase OS=Rattus norvegicus GN=Aldoc PE=1 SV=1	17.6944	6	132	2	1	373	40.459	6.86	NA	6000000	NA	NA	NA	2000000	0.817	1858.45	6	6000000	2000000	0.333333	0.333333	0.0808625
A0A023IKI3	Proteasome subunit beta type OS=Rattus norvegicus GN=Psmb8 PE=2 SV=1	40.942	10	86	3	1	276	30.558	7.78	NA	NA	12000000	5400000	2600000	NA	2.008	1205.73	10	12000000	4000000	0.333333	0.666667	0.0808625
A0A0G2K1A2	Protein Mpo OS=Rattus norvegicus GN=Mpo PE=1 SV=1	44.7075	28	454	25	1	718	80.832	9.52	31000000	17000000	170000000	NA	42000000	7200000	2.609	7753.47	28	7.26667e+07	24600000	1	0.666667	0.0796207
M0RBF1	Complement C3 OS=Rattus norvegicus GN=C3 PE=1 SV=1	61.5153	88	2401	88	1	1663	186.206	6.47	110000000	150000000	950000000	170000000	160000000	80000000	9.366	40962.2	88	4.03333e+08	1.36667e+08	1	1	0.0795477
A0A0G2JUS6	Aldehyde dehydrogenase family 1 member A3 OS=Rattus norvegicus GN=Aldh1a3 PE=1 SV=1	18.3594	8	60	7	1	512	56.05	6.57	7500000	16000000	NA	NA	3600000	4400000	0.604	1024.34	8	11750000	4000000	0.666667	0.666667	0.0791779
F1MA18	Y-box-binding protein 3 OS=Rattus norvegicus GN=Ybx3 PE=1 SV=1	19.9446	6	66	2	1	361	38.837	9.69	3800000	NA	9100000	NA	NA	2200000	0.817	793.401	6	6450000	2200000	0.666667	0.333333	0.0790247
A0A0G2JZ73	Alpha-1-antiproteinase OS=Rattus norvegicus GN=Serpina1 PE=1 SV=1	48.4337	17	927	17	1	415	46.605	6.34	180000000	340000000	1500000000	270000000	220000000	200000000	8.284	16870.9	17	6.73333e+08	230000000	1	1	0.0789093
D3ZIK1	Protein Lin28b OS=Rattus norvegicus GN=Lin28b PE=4 SV=1	3.69004	1	16	1	1	271	30.059	8.57	NA	72000000	310000000	82000000	NA	49000000	0.105	28.2	1	191000000	65500000	0.666667	0.666667	0.0785992
B0BNE2	DNA-directed RNA polymerases I, II, and III subunit RPABC1 OS=Rattus norvegicus GN=Polr2e PE=2 SV=1	16.6667	3	16	3	1	210	24.555	5.95	4000000	21000000	3600000	NA	NA	3300000	0.896	52.2282	3	9.53333e+06	3300000	1	0.333333	0.0778676
P42533	Tissue factor OS=Rattus norvegicus GN=F3 PE=2 SV=1	18.6441	5	32	5	1	295	33.423	9.8	NA	5700000	26000000	5000000	7200000	4300000	0.738	853.889	5	15850000	5500000	0.666667	1	0.077677
F1M9W9	Protein LOC103689930 OS=Rattus norvegicus GN=Trappc8 PE=1 SV=2	1.32589	2	20	2	1	1433	160.249	6.92	14000000	5000000	NA	3700000	4100000	2100000	0.043	567.244	2	9500000	3300000	0.666667	1	0.0775954
D3ZE00	Uncharacterized protein OS=Rattus norvegicus PE=4 SV=3	27.551	2	38	2	1	98	10.842	6.58	52000000	36000000	250000000	39000000	52000000	27000000	1.154	1362.56	2	1.12667e+08	3.93333e+07	1	1	0.0772077
G3V6B2	Serine (Or cysteine) peptidase inhibitor, clade B (Ovalbumin), member 10 OS=Rattus norvegicus GN=Serpinb10 PE=1 SV=1	44.5844	13	129	13	1	397	45.286	6.55	14000000	19000000	36000000	8600000	10000000	5500000	2.687	2168.34	13	23000000	8.03333e+06	1	1	0.0771717
Q6AYU6	Aqp5 protein (Fragment) OS=Rattus norvegicus GN=Aqp5 PE=2 SV=1	14.0468	3	49	3	1	299	31.905	9.47	26000000	65000000	6700000	NA	13000000	10000000	0.931	998.278	3	3.25667e+07	11500000	1	0.666667	0.0763311
Q6LE95	Kininogen OS=Rattus norvegicus GN=Kng1l1 PE=4 SV=1	50	4	96	2	1	56	6.01	8.98	NA	8800000	200000000	21000000	53000000	NA	14.849	769.241	4	104400000	37000000	0.666667	0.666667	0.0760545
A0A0G2JST6	Hexokinase OS=Rattus norvegicus GN=Hk3 PE=1 SV=1	27.2727	21	98	19	1	924	100.104	5.43	NA	NA	31000000	NA	11000000	NA	1.512	1721.95	21	31000000	11000000	0.333333	0.333333	0.0759618
E9PU64	Protein Scin OS=Rattus norvegicus GN=Scin PE=1 SV=1	8.11189	6	12	6	1	715	80.092	5.95	NA	18000000	NA	NA	6400000	NA	0.28	110.221	6	18000000	6400000	0.333333	0.333333	0.0758086
Q5MYX2	2 '-5 ' oligoadenylate synthetase 1K OS=Rattus norvegicus GN=Oas1k PE=2 SV=1	22.9462	7	23	5	1	353	40.647	8.95	4100000	NA	24000000	NA	NA	5000000	0.711	378.289	7	14050000	5000000	0.666667	0.333333	0.0757412
G3V9T9	Tyrosine-protein phosphatase non-receptor type OS=Rattus norvegicus GN=Ptpn6 PE=1 SV=1	47.7977	25	358	25	1	613	69.575	7.75	150000000	26000000	34000000	24000000	35000000	16000000	2.525	6385.53	25	70000000	25000000	1	1	0.0754717
Q4QQV8	Charged multivesicular body protein 5 OS=Rattus norvegicus GN=Chmp5 PE=2 SV=1	20.0913	3	31	3	1	219	24.56	4.79	5900000	130000000	NA	61000000	7100000	5100000	0.638	339.206	3	67950000	24400000	0.666667	1	0.075063
Q6AXS3	Protein DEK OS=Rattus norvegicus GN=Dek PE=1 SV=1	17.7249	6	75	6	1	378	42.866	7.69	17000000	930000000	8900000	190000000	140000000	14000000	0.565	1046.34	6	3.18633e+08	1.14667e+08	1	1	0.0748997
P09811	Glycogen phosphorylase, liver form OS=Rattus norvegicus GN=Pygl PE=1 SV=5	31.5294	23	233	16	1	850	97.421	7.2	11000000	10000000	23000000	2800000	8500000	4600000	1.558	1636.14	23	1.46667e+07	5300000	1	1	0.0745902
Q4QQV3	Protein FAM162A OS=Rattus norvegicus GN=Fam162a PE=2 SV=1	17.4194	3	8	3	1	155	17.816	9.99	NA	25000000	NA	NA	NA	9100000	0.701	37.2315	3	25000000	9100000	0.333333	0.333333	0.0740499
F1LRI5	Protein Gcn1l1 OS=Rattus norvegicus GN=Gcn1l1 PE=1 SV=3	12.7293	25	178	25	1	2671	292.886	7.3	54000000	8500000	3100000	7900000	11000000	5100000	0.321	2116.67	25	2.18667e+07	8000000	1	1	0.0736748
Q63041	Alpha-1-macroglobulin OS=Rattus norvegicus GN=A1m PE=1 SV=1	56.8667	59	1143	59	1	1500	167.019	6.9	130000000	140000000	640000000	170000000	120000000	44000000	8.765	17583.6	59	3.03333e+08	1.11333e+08	1	1	0.073438
D4A582	Protein Zdbf2 OS=Rattus norvegicus GN=Zdbf2 PE=4 SV=3	0.631313	2	14	2	1	2376	261.789	5.08	110000000	190000000	NA	33000000	NA	78000000	0.032	57.5137	2	150000000	55500000	0.666667	0.666667	0.0728491
Q64240	Protein AMBP OS=Rattus norvegicus GN=Ambp PE=1 SV=1	32.0917	10	125	10	1	349	38.826	6	19000000	30000000	220000000	40000000	37000000	23000000	1.783	3598.11	10	8.96667e+07	3.33333e+07	1	1	0.0725067
O35077	Glycerol-3-phosphate dehydrogenase [NAD(+)], cytoplasmic OS=Rattus norvegicus GN=Gpd1 PE=1 SV=4	26.9341	9	36	8	1	349	37.428	6.6	NA	19000000	NA	9200000	NA	5000000	1.096	370.817	9	19000000	7100000	0.333333	0.666667	0.0721309
Q68FY4	Group specific component OS=Rattus norvegicus GN=Gc PE=1 SV=1	58.4034	25	646	25	1	476	53.483	5.86	110000000	150000000	610000000	140000000	120000000	67000000	7.254	14150.7	25	290000000	109000000	1	1	0.071713
P11517	Hemoglobin subunit beta-2 OS=Rattus norvegicus PE=1 SV=2	85.034	14	1423	2	1	147	15.972	8.79	260000000	510000000	1200000000	360000000	310000000	71000000	162.789	24950.8	14	6.56667e+08	247000000	1	1	0.0716596
Q6AYT7	Monoacylglycerol lipase ABHD12 OS=Rattus norvegicus GN=Abhd12 PE=2 SV=1	20.1005	6	40	6	1	398	45.267	8.72	3500000	15000000	NA	3200000	4200000	3100000	0.748	454.834	6	9250000	3500000	0.666667	1	0.071236
A0A0A0MXW1	2-oxoisovalerate dehydrogenase subunit beta, mitochondrial OS=Rattus norvegicus GN=Bckdhb PE=1 SV=1	3.06905	1	6	1	1	391	42.933	6.9	NA	14000000	NA	NA	NA	5300000	0.096	89.2817	1	14000000	5300000	0.333333	0.333333	0.0711997
M0R7T1	Phosphatase and actin regulator OS=Rattus norvegicus GN=Phactr4 PE=1 SV=2	8.2232	4	20	4	1	681	74.255	5.8	6100000	NA	NA	3900000	NA	750000	0.216	195.67	4	6100000	2325000	0.333333	0.666667	0.0707185
D3ZWD6	Complement component 8, alpha polypeptide (Predicted) OS=Rattus norvegicus GN=C8a PE=1 SV=1	18.0579	10	37	10	1	587	66.23	5.96	NA	4700000	22000000	5900000	4300000	NA	0.73	655.027	10	13350000	5100000	0.666667	0.666667	0.0705565
Q7TP05	Da1-24 OS=Rattus norvegicus GN=Cfb PE=1 SV=1	36.2903	35	522	35	0	1116	123.96	7.11	44000000	42000000	400000000	70000000	72000000	44000000	3.187	8693.1	35	162000000	62000000	1	1	0.0704287
A0A0G2JSH5	Serum albumin OS=Rattus norvegicus GN=Alb PE=1 SV=1	82.4013	55	6654	2	1	608	68.714	6.48	3400000000	5800000000	15000000000	NA	3100000000	NA	71.79	133929	55	8.06667e+09	3100000000	1	0.333333	0.0701388
D3ZNJ5	Protein Inmt OS=Rattus norvegicus GN=Inmt PE=1 SV=1	43.9394	9	139	9	1	264	29.476	6.01	41000000	130000000	39000000	34000000	NA	20000000	4.995	2995.17	9	70000000	27000000	1	0.666667	0.0698812
D4A264	Protein Zadh2 OS=Rattus norvegicus GN=Zadh2 PE=1 SV=2	3.97878	1	2	1	1	377	40.51	7.77	NA	7500000	NA	2900000	NA	NA	0.096	93.8679	1	7500000	2900000	0.333333	0.333333	0.0697091
P41562	Isocitrate dehydrogenase [NADP] cytoplasmic OS=Rattus norvegicus GN=Idh1 PE=1 SV=1	55.7971	20	405	18	1	414	46.705	6.99	460000000	87000000	24000000	71000000	100000000	52000000	3.375	5993.86	20	1.90333e+08	7.43333e+07	1	1	0.0690172
P80349	Fuctinin-3 (Fragment) OS=Rattus norvegicus PE=1 SV=1	38.4615	1	14	1	1	39	4.477	4.22	NA	NA	4600000	NA	1800000	NA	1.154	338.948	1	4600000	1800000	0.333333	0.333333	0.0688829
D3ZMI6	Olfactomedin 4 (Predicted) OS=Rattus norvegicus GN=Olfm4 PE=1 SV=1	22.8963	9	51	9	1	511	57.863	5.87	NA	NA	28000000	NA	11000000	NA	0.968	1183.63	9	28000000	11000000	0.333333	0.333333	0.0686106
A0A0G2JSI0	Dimethylaniline monooxygenase [N-oxide-forming] OS=Rattus norvegicus GN=Fmo3 PE=1 SV=1	27.6836	14	123	14	1	531	59.937	8.05	23000000	43000000	4300000	12000000	12000000	3900000	1.543	1995.49	14	2.34333e+07	9300000	1	1	0.0679168
Q811Y3	Neutrophil cytosolic factor 1 OS=Rattus norvegicus GN=Ncf1 PE=2 SV=1	30.3342	11	55	11	1	389	44.652	9.17	3900000	NA	30000000	NA	8500000	5000000	1.352	494.598	11	16950000	6750000	0.666667	0.666667	0.0676849
O88752	Epsilon 1 globin OS=Rattus norvegicus GN=Hbe1 PE=1 SV=1	12.2449	2	189	1	1	147	16.094	8.18	NA	NA	130000000	NA	NA	12000000	6.419	9367.91	31	1.72333e+08	6.86667e+07	1	1	0.0676471
D4AC23	Protein Cct7 OS=Rattus norvegicus GN=Cct7 PE=1 SV=1	60.2941	28	448	28	1	544	59.62	8	85000000	570000000	54000000	100000000	120000000	63000000	4.766	8544.1	28	2.36333e+08	9.43333e+07	1	1	0.0675283
G3V8H5	Inhibitor of kappaB kinase beta, isoform CRA_b OS=Rattus norvegicus GN=Ikbkb PE=1 SV=1	5.41612	3	5	3	1	757	86.837	6.25	NA	3000000	NA	NA	1200000	NA	0.118	0	3	3000000	1200000	0.333333	0.333333	0.0673854
D3ZBW3	Protein Tmem201 OS=Rattus norvegicus GN=Tmem201 PE=1 SV=2	4.19355	2	22	2	1	620	67.925	9.13	5500000	9400000	NA	3000000	NA	NA	0.233	174.301	2	7450000	3000000	0.666667	0.333333	0.0669362
A0A096MKE0	Protein Asph OS=Rattus norvegicus GN=Asph PE=1 SV=1	14.9254	9	53	9	1	737	82.611	5.08	45000000	11000000	NA	5900000	18000000	10000000	0.478	640.763	9	28000000	11300000	0.666667	1	0.0667891
O55006	Protein RoBo-1 OS=Rattus norvegicus PE=1 SV=1	19.5833	4	91	4	1	240	26.17	7.33	18000000	3200000	160000000	NA	43000000	6000000	1.276	3018.99	4	60400000	24500000	1	0.666667	0.0664503
Q53Z83	Metallothionein OS=Rattus norvegicus GN=Mt1 PE=1 SV=1	55.7377	2	17	2	1	61	6.001	7.96	NA	6600000	19000000	3500000	6900000	NA	1.154	682.41	2	12800000	5200000	0.666667	0.666667	0.0663487
D3ZWC6	Protein Sntb1 OS=Rattus norvegicus GN=Sntb1 PE=1 SV=1	28.757	10	71	9	1	539	58.256	8.31	15000000	18000000	NA	7900000	NA	5600000	0.753	731.861	10	16500000	6750000	0.666667	0.666667	0.065888
P14604	Enoyl-CoA hydratase, mitochondrial OS=Rattus norvegicus GN=Echs1 PE=1 SV=1	35.8621	10	253	10	1	290	31.496	8.13	260000000	96000000	36000000	63000000	65000000	33000000	2.831	3861.74	10	1.30667e+08	5.36667e+07	1	1	0.0656276
F7F389	Complement component C9 OS=Rattus norvegicus GN=C9 PE=1 SV=1	34.3103	21	275	21	1	580	65.243	6.1	16000000	25000000	210000000	38000000	49000000	17000000	2.415	4974.11	21	8.36667e+07	3.46667e+07	1	1	0.0650529
Q5XIT9	Methylcrotonoyl-CoA carboxylase beta chain, mitochondrial OS=Rattus norvegicus GN=Mccc2 PE=2 SV=1	23.9787	11	90	11	1	563	61.478	8.31	9100000	18000000	NA	5300000	8700000	3100000	0.823	931.345	11	13550000	5700000	0.666667	1	0.0640753
Q64244	ADP-ribosyl cyclase/cyclic ADP-ribose hydrolase 1 OS=Rattus norvegicus GN=Cd38 PE=1 SV=1	19.1419	5	70	5	1	303	34.413	8.5	20000000	20000000	NA	13000000	5700000	6600000	1.228	459.66	5	20000000	8.43333e+06	0.666667	1	0.063923
P04639	Apolipoprotein A-I OS=Rattus norvegicus GN=Apoa1 PE=1 SV=2	63.3205	16	442	16	1	259	30.043	5.74	91000000	120000000	400000000	130000000	73000000	55000000	13.925	6930.53	16	2.03667e+08	86000000	1	1	0.0638333
Q66H86	Olfactomedin-like protein 1 OS=Rattus norvegicus GN=Olfml1 PE=2 SV=1	24.6269	9	79	9	1	402	45.571	7.55	5900000	26000000	NA	6800000	8100000	5400000	0.995	568.064	9	15950000	6.76667e+06	0.666667	1	0.0635348
P00770	Mast cell protease 2 OS=Rattus norvegicus GN=Mcpt2 PE=1 SV=1	29.1498	6	95	6	1	247	27.084	8.03	79000000	140000000	6900000	29000000	36000000	31000000	2.162	1297.8	6	75300000	32000000	1	1	0.0634265
Q5FWU0	WAS protein family, member 2 OS=Rattus norvegicus GN=Wasf2 PE=2 SV=1	16.2978	8	72	8	1	497	53.943	5.53	34000000	15000000	5900000	9500000	NA	6100000	0.812	1717.04	8	18300000	7800000	1	0.666667	0.0632386
A0A0G2K3V4	O-linked N-acetylglucosamine (GlcNAc) transferase (UDP-N-acetylglucosamine:polypeptide-N-acetylglucosaminyl transferase), isoform CRA_a OS=Rattus norvegicus GN=Ogt PE=1 SV=1	4.68451	4	39	4	1	1046	116.879	6.7	8700000	8900000	NA	2800000	3300000	5200000	0.152	546.971	4	8800000	3.76667e+06	0.666667	1	0.0629726
P05545	Serine protease inhibitor A3K OS=Rattus norvegicus GN=Serpina3k PE=1 SV=3	42.3077	16	421	2	1	416	46.532	5.44	NA	160000000	NA	NA	93000000	44000000	5.813	7201.39	16	160000000	68500000	0.333333	0.666667	0.0629587
A0A0G2JSK1	Protein Serpina3c OS=Rattus norvegicus GN=Serpina3c PE=3 SV=1	45.6731	19	480	4	1	416	46.448	5.44	47000000	34000000	98000000	41000000	21000000	15000000	9	7824.38	19	5.96667e+07	2.56667e+07	1	1	0.0626597
P0DN35	NADH dehydrogenase [ubiquinone] 1 beta subcomplex subunit 1 OS=Rattus norvegicus GN=Ndufb1 PE=3 SV=1	31.5789	2	16	2	1	57	6.994	8.59	NA	12000000	NA	4700000	7500000	3300000	1.154	77.1452	2	12000000	5.16667e+06	0.333333	1	0.0626033
Q3B8R6	Alpha-2-glycoprotein 1, zinc OS=Rattus norvegicus GN=Azgp1 PE=1 SV=1	27.7027	7	35	7	1	296	34.012	6.24	5900000	NA	17000000	5600000	5300000	3900000	1.154	192.713	7	11450000	4.93333e+06	0.666667	1	0.0625592
B0BNM4	Protein RGD1308134 OS=Rattus norvegicus GN=RGD1308134 PE=1 SV=1	8.18713	1	16	1	1	171	17.943	7.33	NA	7400000	NA	NA	NA	3200000	0.212	118.095	1	7400000	3200000	0.333333	0.333333	0.0623315
P02091	Hemoglobin subunit beta-1 OS=Rattus norvegicus GN=Hbb PE=1 SV=3	95.2381	15	1608	3	1	147	15.969	8.07	1200000000	2000000000	4800000000	1700000000	1400000000	370000000	411.463	35060.9	15	2.66667e+09	1.15667e+09	1	1	0.0621422
G3V811	Coagulation factor XIII A chain OS=Rattus norvegicus GN=F13a1 PE=1 SV=1	16.9399	11	51	11	1	732	83.002	5.62	5400000	11000000	22000000	6800000	7300000	2600000	0.684	260.53	11	12800000	5.56667e+06	1	1	0.0619785
Q5BJQ0	Atypical kinase ADCK3, mitochondrial OS=Rattus norvegicus GN=Adck3 PE=2 SV=1	4.31433	2	5	2	1	649	72.18	6.46	NA	11000000	NA	NA	4800000	NA	0.103	50.8041	2	11000000	4800000	0.333333	0.333333	0.06177
Q5UT90	MHC class II antigen OS=Rattus norvegicus GN=RT1-Bb PE=2 SV=1	34.6008	8	68	3	1	263	29.951	8.15	NA	48000000	NA	NA	NA	21000000	2.162	652.8	8	48000000	21000000	0.333333	0.333333	0.0616095
B2RYN3	Eukaryotic translation elongation factor 1 epsilon 1 OS=Rattus norvegicus GN=Eef1e1 PE=1 SV=1	30.4598	4	22	4	1	174	19.83	8.16	NA	13000000	NA	5300000	7200000	4600000	0.968	174.711	4	13000000	5700000	0.333333	1	0.0614744
P09606	Glutamine synthetase OS=Rattus norvegicus GN=Glul PE=1 SV=3	30.0268	9	111	9	1	373	42.24	7.08	23000000	35000000	28000000	6900000	27000000	4100000	1.276	985.643	9	2.86667e+07	1.26667e+07	1	1	0.0610016
G3V729	Bone marrow proteoglycan OS=Rattus norvegicus GN=Prg2 PE=1 SV=1	25.1101	5	76	5	1	227	25.145	6	43000000	70000000	NA	19000000	22000000	34000000	1.054	2478.19	5	56500000	25000000	0.666667	1	0.0609164
F1M7M4	Protein Bmp2k OS=Rattus norvegicus GN=Bmp2k PE=1 SV=3	4.33145	3	14	3	1	1062	118.639	6.4	NA	6100000	NA	2700000	NA	NA	0.12	30.42	3	6100000	2700000	0.333333	0.333333	0.0608965
Q9ESN0	Protein Niban OS=Rattus norvegicus GN=Fam129a PE=1 SV=2	28.175	22	267	22	1	937	103.401	4.7	20000000	110000000	30000000	34000000	23000000	14000000	1.575	3011.84	22	5.33333e+07	2.36667e+07	1	1	0.0607418
Q6AXY8	Dehydrogenase/reductase (SDR family) member 1 OS=Rattus norvegicus GN=Dhrs1 PE=1 SV=1	24.6006	6	31	6	1	313	33.993	8.21	NA	12000000	NA	4300000	NA	6400000	0.859	363.283	6	12000000	5350000	0.333333	0.666667	0.060458
P97521	Mitochondrial carnitine/acylcarnitine carrier protein OS=Rattus norvegicus GN=Slc25a20 PE=1 SV=1	35.2159	9	50	9	1	301	33.132	9.48	18000000	25000000	33000000	10000000	12000000	12000000	1.219	259.278	9	2.53333e+07	1.13333e+07	1	1	0.0602505
A9UMV7	Protein Uqcr11 OS=Rattus norvegicus GN=Uqcr11 PE=1 SV=1	21.4286	1	11	1	1	56	6.534	9.7	NA	15000000	NA	NA	8600000	4900000	0.585	64.86	1	15000000	6750000	0.333333	0.666667	0.0598982
Q6MG51	Uncharacterized protein C6orf47 homolog OS=Rattus norvegicus GN=G4 PE=1 SV=1	3.07167	1	3	1	1	293	31.806	7.17	NA	2100000	NA	NA	1100000	800000	0.145	56.6961	1	2100000	950000	0.333333	0.666667	0.0595829
D3ZX87	Protein LOC100910017 OS=Rattus norvegicus GN=LOC100910017 PE=4 SV=2	21.6783	3	21	3	1	143	16.311	10.4	NA	NA	61000000	47000000	34000000	1900000	0.54	291.319	3	61000000	2.76333e+07	0.333333	1	0.0595008
B2RZ62	Ap3s1 protein OS=Rattus norvegicus GN=Ap3s1 PE=2 SV=1	9.25926	1	19	1	1	162	18.759	5.08	NA	5300000	27000000	4300000	8000000	9900000	0.292	264.789	1	16150000	7400000	0.666667	1	0.0588257
G3V945	Aldehyde dehydrogenase family 5, subfamily A1 OS=Rattus norvegicus GN=Aldh5a1 PE=1 SV=1	5.54493	2	8	2	1	523	56.11	8.09	NA	12000000	NA	3200000	7800000	NA	0.125	63.983	2	12000000	5500000	0.333333	0.666667	0.0588091
P80431	Cytochrome c oxidase subunit 7B, mitochondrial OS=Rattus norvegicus GN=Cox7b PE=1 SV=3	8.75	1	6	1	1	80	8.99	10.11	12000000	22000000	NA	NA	NA	7800000	0.334	25.6977	1	17000000	7800000	0.666667	0.333333	0.0587463
F7FHF3	Protein Serpinf2 OS=Rattus norvegicus GN=Serpinf2 PE=1 SV=1	25.8123	10	71	10	1	554	62.252	6.8	9600000	13000000	70000000	19000000	14000000	9600000	1.246	2287.71	10	3.08667e+07	14200000	1	1	0.0585905
A0A0G2JSV6	Protein Hba-a2 OS=Rattus norvegicus GN=Hba-a2 PE=1 SV=1	88.7324	12	1359	1	1	142	15.275	8.31	83000000	170000000	340000000	130000000	120000000	23000000	145.78	28961.3	12	1.97667e+08	91000000	1	1	0.0585488
A0A0G2JZ40	Protein Reck OS=Rattus norvegicus GN=Reck PE=4 SV=1	9.77366	7	41	7	1	972	105.901	6.84	13000000	17000000	NA	8600000	6700000	5600000	0.267	1396.75	7	15000000	6.96667e+06	0.666667	1	0.0580353
Q5FVQ8	NLR family member X1 OS=Rattus norvegicus GN=Nlrx1 PE=2 SV=1	7.29702	7	29	7	1	973	107.522	7.56	3400000	5400000	NA	840000	3500000	1800000	0.255	481.671	7	4400000	2.04667e+06	0.666667	1	0.0579471
A0A0G2K6S9	Myosin-11 OS=Rattus norvegicus GN=Myh11 PE=1 SV=1	59.424	125	3412	1	1	1979	227.906	5.49	NA	30000000	NA	14000000	NA	NA	8.253	68292.5	125	30000000	14000000	0.333333	0.333333	0.057759
B2RZD7	LYR motif-containing protein 9 OS=Rattus norvegicus GN=Lyrm9 PE=3 SV=1	7.69231	1	22	1	1	78	9.373	9.25	5200000	9000000	23000000	5500000	7900000	4000000	0.292	234.225	1	12400000	5800000	1	1	0.0576262
F1LU71	AU RNA binding protein/enoyl-coenzyme A hydratase (Predicted), isoform CRA_a OS=Rattus norvegicus GN=Auh PE=1 SV=2	16.1905	4	22	4	1	315	33.32	9.42	9200000	8100000	NA	2600000	5500000	NA	0.374	37.2168	4	8650000	4050000	0.666667	0.666667	0.0575688
G3V836	Clusterin OS=Rattus norvegicus GN=Clu PE=1 SV=1	37.3602	13	161	13	1	447	51.387	5.81	20000000	42000000	99000000	32000000	35000000	8600000	2.162	3143.34	13	5.36667e+07	25200000	1	1	0.0574024
P23928	Alpha-crystallin B chain OS=Rattus norvegicus GN=Cryab PE=1 SV=1	55.4286	8	174	8	1	175	20.076	7.33	36000000	180000000	6700000	70000000	20000000	15000000	6.197	1579.86	8	7.42333e+07	35000000	1	1	0.0571685
A0A096MK41	Protein LOC259246 OS=Rattus norvegicus GN=LOC259245 PE=1 SV=1	13.8122	2	18	2	1	181	20.905	5.92	12000000	19000000	6300000	NA	5900000	NA	0.585	167.459	2	1.24333e+07	5900000	1	0.333333	0.0568017
Q5U2U2	Crk-like protein OS=Rattus norvegicus GN=Crkl PE=1 SV=1	30.6931	6	29	6	1	303	33.844	6.74	14000000	20000000	NA	12000000	NA	4200000	1.015	181.096	6	17000000	8100000	0.666667	0.666667	0.0565705
F1M4R1	Uncharacterized protein OS=Rattus norvegicus PE=4 SV=1	9.56522	1	5	1	1	115	13.143	8.85	NA	NA	23000000	NA	11000000	NA	0.259	60.347	1	23000000	11000000	0.333333	0.333333	0.0563587
Q9JM80	Phosphoprotein associated with glycosphingolipid-enriched microdomains 1 OS=Rattus norvegicus GN=Pag1 PE=1 SV=1	5.66038	2	15	2	1	424	45.886	4.81	12000000	22000000	NA	11000000	4800000	8600000	0.202	26.35	2	17000000	8.13333e+06	0.666667	1	0.0563387
Q3ZAV2	Uncharacterized protein OS=Rattus norvegicus GN=Ybx1 PE=1 SV=1	34.0491	8	110	4	1	326	36.179	9.88	21000000	28000000	39000000	12000000	6500000	24000000	1.276	2342.06	8	2.93333e+07	1.41667e+07	1	1	0.055811
P02563	Myosin-6 OS=Rattus norvegicus GN=Myh6 PE=1 SV=2	58.3075	114	787	32	0	1938	223.37	5.74	NA	480000000	NA	70000000	25000000	NA	1.069	223.29	10	11800000	5700000	1	0.333333	0.0557999
P30083	Vasoactive intestinal polypeptide receptor 1 OS=Rattus norvegicus GN=Vipr1 PE=2 SV=1	10.4575	3	29	3	1	459	52.024	8.15	18000000	12000000	NA	11000000	NA	3500000	0.292	372.881	3	15000000	7250000	0.666667	0.666667	0.0557673
G3V8D2	Periaxin OS=Rattus norvegicus GN=Prx PE=1 SV=3	39.1179	41	1033	2	1	1383	146.224	8.1	9100000	NA	4700000	4700000	NA	2000000	1.86	16181.6	41	6900000	3350000	0.666667	0.666667	0.0555176
Q499V8	Specifically androgen-regulated gene protein OS=Rattus norvegicus GN=Sarg PE=1 SV=2	13.0795	6	50	6	1	604	64.573	9.44	12000000	23000000	NA	12000000	5800000	7700000	0.326	691.481	6	17500000	8500000	0.666667	1	0.0554939
A0A0G2KB11	Protein Stard10 OS=Rattus norvegicus GN=Stard10 PE=1 SV=1	9.09091	3	11	3	1	363	40.157	9.04	18000000	19000000	NA	9000000	NA	NA	0.28	130.39	3	18500000	9000000	0.666667	0.333333	0.0554058
B0K017	ADP-ribosylhydrolase like 2 OS=Rattus norvegicus GN=Adprhl2 PE=1 SV=1	11.6216	3	19	3	1	370	39.35	4.96	11000000	12000000	NA	NA	7800000	3400000	0.624	447.223	3	11500000	5600000	0.666667	0.666667	0.0553523
D4A678	Protein Spta1 OS=Rattus norvegicus GN=Spta1 PE=1 SV=3	1.65563	3	60	1	1	2416	279.902	5.03	6200000	18000000	NA	8100000	5100000	4500000	0.033	957.115	3	12100000	5900000	0.666667	1	0.0552789
P20761	Ig gamma-2B chain C region OS=Rattus norvegicus GN=Igh-1a PE=1 SV=1	29.7297	7	251	7	1	333	36.474	7.64	200000000	190000000	710000000	240000000	230000000	75000000	7.799	4650.26	7	3.66667e+08	1.81667e+08	1	1	0.0544029
A0A0G2K290	Uncharacterized protein OS=Rattus norvegicus PE=4 SV=1	30.6452	3	71	3	0	124	13.896	8.16	38000000	32000000	160000000	62000000	34000000	18000000	1.512	2048.43	3	7.66667e+07	38000000	1	1	0.0543812
P20417	Tyrosine-protein phosphatase non-receptor type 1 OS=Rattus norvegicus GN=Ptpn1 PE=1 SV=1	21.0648	8	30	8	1	432	49.643	6.16	NA	NA	13000000	NA	8200000	4700000	0.778	340.293	8	13000000	6450000	0.333333	0.666667	0.0543263
G3V8H7	Olfactomedin-like 3 (Predicted) OS=Rattus norvegicus GN=Olfml3 PE=1 SV=1	22.2488	8	24	8	1	418	47.19	6.87	NA	13000000	NA	8100000	NA	4800000	0.812	234.264	8	13000000	6450000	0.333333	0.666667	0.0543263
A0A0G2K135	Complement factor I OS=Rattus norvegicus GN=Cfi PE=1 SV=1	32.7476	15	130	14	1	626	69.729	7.52	20000000	14000000	65000000	21000000	19000000	9300000	1.188	1765.87	15	33000000	1.64333e+07	1	1	0.0541271
Q62931	Golgi SNAP receptor complex member 1 OS=Rattus norvegicus GN=Gosr1 PE=1 SV=1	4.4	1	16	1	1	250	28.516	9.29	3100000	4100000	NA	NA	NA	1800000	0.202	156.997	1	3600000	1800000	0.666667	0.333333	0.0539084
D2E6L7	NADH-ubiquinone oxidoreductase chain 1 OS=Rattus norvegicus GN=ND1 PE=3 SV=1	11.6352	3	15	3	1	318	36.038	6.92	NA	12000000	NA	NA	7000000	5000000	1.371	58.8203	3	12000000	6000000	0.333333	0.666667	0.0539084
Q4QQS7	Protein Umps OS=Rattus norvegicus GN=Umps PE=1 SV=1	8.31601	3	16	3	1	481	52.345	6.48	NA	2200000	NA	62000000	7500000	NA	0.218	153.508	3	2200000	34750000	0.333333	0.666667	-0.0633094
Q6P6R6	Transglutaminase 2, C polypeptide OS=Rattus norvegicus GN=Tgm2 PE=2 SV=1	59.9125	35	1443	1	1	686	76.887	5.07	2700000	NA	NA	12000000	NA	66000000	10.007	36851	35	2700000	39000000	0.333333	0.666667	-0.0692308
B5DEM3	Tmed4 protein OS=Rattus norvegicus GN=Tmed4 PE=2 SV=1	19.3833	5	71	3	1	227	26.128	8.59	5200000	18000000	NA	NA	17000000	240000000	1.154	1399.64	5	11600000	128500000	0.666667	0.666667	-0.0902724
F1LM60	Protein Arap1 OS=Rattus norvegicus GN=Arap1 PE=1 SV=1	10.4643	11	97	11	1	1443	161.005	6.13	8900000	12000000	3000000	14000000	220000000	8900000	0.346	1680.47	11	7.96667e+06	8.09667e+07	1	1	-0.0983944
Q8CHN6	Sphingosine-1-phosphate lyase 1 OS=Rattus norvegicus GN=Sgpl1 PE=2 SV=1	13.0282	6	54	6	1	568	63.717	9.17	3700000	6400000	10000000	180000000	11000000	2900000	0.528	757.486	6	6700000	6.46333e+07	1	1	-0.103662
Q5PPJ6	Leucyl-tRNA synthetase OS=Rattus norvegicus GN=Lars PE=1 SV=1	11.8846	11	92	11	1	1178	134.192	7.28	5400000	6300000	7900000	59000000	68000000	8200000	0.342	420.241	11	6.53333e+06	4.50667e+07	1	1	-0.14497
Q62703	Reticulocalbin-2 OS=Rattus norvegicus GN=Rcn2 PE=1 SV=2	28.125	7	46	7	1	320	37.41	4.41	NA	3300000	2200000	15000000	26000000	14000000	1.239	767.495	7	2750000	1.83333e+07	0.666667	1	-0.15
B4F7A0	Tnxb protein OS=Rattus norvegicus GN=Tnxb PE=2 SV=1	6.35193	5	36	5	1	1165	126.651	5.6	1700000	12000000	NA	14000000	120000000	1900000	0.212	788.225	5	6850000	45300000	0.666667	1	-0.151214
O08699	15-hydroxyprostaglandin dehydrogenase [NAD(+)] OS=Rattus norvegicus GN=Hpgd PE=2 SV=2	13.9098	3	7	3	1	266	28.921	6.39	1800000	NA	NA	11000000	NA	NA	0.389	55.41	3	1800000	11000000	0.333333	0.333333	-0.163636
G3V6B0	Protein LOC103689979 OS=Rattus norvegicus GN=Pdxdc1 PE=1 SV=1	8.40764	5	49	5	1	785	86.916	5.53	9600000	NA	NA	130000000	17000000	12000000	0.243	556.736	5	9600000	53000000	0.333333	1	-0.181132
Q5UT80	MHC class II antigen OS=Rattus norvegicus GN=BA1 PE=2 SV=1	37.5	6	85	3	1	256	28.35	5.01	8300000	39000000	NA	NA	NA	130000000	2.415	936.886	6	23650000	130000000	0.666667	0.333333	-0.181923
A0A0G2K401	Propionyl-CoA carboxylase alpha chain, mitochondrial OS=Rattus norvegicus GN=Pcca PE=1 SV=1	18.6722	12	76	12	1	723	79.761	7.21	6200000	16000000	NA	12000000	160000000	6700000	0.633	320.623	12	11100000	5.95667e+07	0.666667	1	-0.186346
O54924	Exocyst complex component 8 OS=Rattus norvegicus GN=Exoc8 PE=1 SV=1	10.8939	6	22	6	1	716	80.992	5.4	5100000	9800000	3600000	2400000	62000000	NA	0.259	190.45	6	6.16667e+06	32200000	1	0.666667	-0.191511
A0A0G2KA25	Transmembrane 9 superfamily member 4 OS=Rattus norvegicus GN=Tm9sf4 PE=1 SV=1	12.1306	7	32	7	1	643	74.68	7.06	2800000	3500000	NA	NA	16000000	NA	0.546	229.66	7	3150000	16000000	0.666667	0.333333	-0.196875
Q9ER24	Ataxin-10 OS=Rattus norvegicus GN=Atxn10 PE=1 SV=1	24.4211	10	87	10	1	475	53.692	5.15	2700000	11000000	4200000	6800000	77000000	5100000	0.855	737.414	10	5.96667e+06	2.96333e+07	1	1	-0.20135
Q6P791	Ragulator complex protein LAMTOR1 OS=Rattus norvegicus GN=Lamtor1 PE=1 SV=1	16.1491	2	15	2	1	161	17.71	5.02	8900000	13000000	NA	NA	54000000	NA	0.52	161.991	2	10950000	54000000	0.666667	0.333333	-0.202778
Q9R0T4	Cadherin-1 OS=Rattus norvegicus GN=Cdh1 PE=1 SV=1	12.0767	8	64	8	1	886	98.654	4.81	18000000	11000000	7200000	94000000	61000000	12000000	0.526	364.419	8	1.20667e+07	5.56667e+07	1	1	-0.216766
D4A510	Protein Smarcc2 OS=Rattus norvegicus GN=Smarcc2 PE=1 SV=3	14.185	14	141	7	1	1135	124.661	5.44	5200000	7000000	NA	28000000	26000000	30000000	0.614	1703.67	14	6100000	28000000	0.666667	1	-0.217857
Q4V797	Interferon-gamma-inducible GTPase Ifgga1 protein OS=Rattus norvegicus GN=RGD1309362 PE=1 SV=1	32.6139	11	66	6	1	417	48.241	7.47	2700000	3100000	NA	NA	13000000	NA	0.983	762.614	11	2900000	13000000	0.666667	0.333333	-0.223077
Q9TP50	Ak (Fragment) OS=Rattus norvegicus GN=RT1-Ak PE=2 SV=1	15.3623	5	104	2	0	345	38.725	5.77	NA	NA	3800000	8500000	25000000	NA	0.468	1851.25	5	3800000	16750000	0.333333	0.666667	-0.226866
D3ZXF9	Protein Mrpl12 OS=Rattus norvegicus GN=Mrpl12 PE=1 SV=1	10.5072	3	23	3	1	276	29.423	9.66	3900000	NA	NA	21000000	NA	13000000	0.52	93.6106	3	3900000	17000000	0.333333	0.666667	-0.229412
P52590	Nuclear pore complex protein Nup107 OS=Rattus norvegicus GN=Nup107 PE=1 SV=1	1.83585	2	15	2	1	926	107.141	5.53	12000000	16000000	NA	NA	NA	61000000	0.065	85.5936	2	14000000	61000000	0.666667	0.333333	-0.229508
M0R660	Glyceraldehyde-3-phosphate dehydrogenase OS=Rattus norvegicus PE=1 SV=1	53.1532	15	895	1	1	333	35.76	8.25	19000000	NA	NA	NA	NA	80000000	7.377	26893.7	15	19000000	80000000	0.333333	0.333333	-0.2375
Q5FVH2	Phospholipase D3 OS=Rattus norvegicus GN=Pld3 PE=2 SV=1	11.2705	4	44	4	1	488	54.364	6.52	2300000	2800000	1900000	3500000	17000000	8600000	0.389	972.039	4	2.33333e+06	9700000	1	1	-0.24055
Q71UF4	Histone-binding protein RBBP7 OS=Rattus norvegicus GN=Rbbp7 PE=2 SV=1	29.6471	9	151	4	1	425	47.79	5.05	NA	5800000	NA	NA	24000000	NA	1.721	2278.12	9	5800000	24000000	0.333333	0.333333	-0.241667
D3ZJF9	Protein Gla OS=Rattus norvegicus GN=Gla PE=1 SV=2	5.71429	2	9	2	1	420	47.543	5.72	2000000	2700000	NA	NA	14000000	5100000	0.318	21.96	2	2350000	9550000	0.666667	0.666667	-0.246073
A0JPN3	BPI fold-containing family B member 1 OS=Rattus norvegicus GN=Bpifb1 PE=2 SV=1	23.3546	9	42	9	1	471	52.186	6.13	NA	7100000	NA	NA	49000000	8100000	1.009	613.433	9	7100000	28550000	0.333333	0.666667	-0.248687
Q66H91	G protein-coupled receptor kinase interacting ArfGAP 2 OS=Rattus norvegicus GN=Git2 PE=1 SV=1	10.1449	7	50	5	1	759	84.472	7.74	3800000	5300000	NA	44000000	6900000	3100000	0.32	178.313	7	4550000	18000000	0.666667	1	-0.252778
A0A0G2K022	Protein Rcn3 OS=Rattus norvegicus GN=Rcn3 PE=1 SV=1	33.8279	9	48	9	1	337	38.919	4.86	4400000	12000000	1800000	32000000	30000000	9300000	1.848	1352.95	9	6.06667e+06	2.37667e+07	1	1	-0.255259
A2NB72	Productively rearranged V-lambda-1 (Fragment) OS=Rattus norvegicus PE=2 SV=1	7.31707	1	3	1	1	123	12.811	5.66	NA	NA	4400000	NA	17000000	NA	0.778	44.9051	1	4400000	17000000	0.333333	0.333333	-0.258824
P06341	Rano class II histocompatibility antigen, A beta chain (Fragment) OS=Rattus norvegicus GN=RT1-B PE=3 SV=1	16.7382	3	29	1	1	233	26.81	6.68	NA	NA	9600000	NA	37000000	NA	0.668	221.528	3	9600000	37000000	0.333333	0.333333	-0.259459
D3ZY47	Protein RGD1559896 OS=Rattus norvegicus GN=RGD1559896 PE=1 SV=1	5.24691	2	7	2	1	324	35.647	5.07	7500000	NA	NA	28000000	NA	NA	0.212	29.63	2	7500000	28000000	0.333333	0.333333	-0.267857
Q498R3	DnaJ homolog subfamily C member 10 OS=Rattus norvegicus GN=Dnajc10 PE=2 SV=2	5.42245	4	9	4	1	793	90.689	7.14	NA	NA	2200000	8200000	NA	NA	0.169	75.1607	4	2200000	8200000	0.333333	0.333333	-0.268293
Q68FY1	Nucleoporin NUP53 OS=Rattus norvegicus GN=Nup35 PE=1 SV=1	10.4615	2	10	2	1	325	34.78	9.25	1700000	NA	NA	NA	6300000	NA	0.292	116.952	2	1700000	6300000	0.333333	0.333333	-0.269841
B2RYG2	Pck2 protein (Fragment) OS=Rattus norvegicus GN=Pck2 PE=2 SV=1	20.6637	11	101	11	1	663	73.225	8	11000000	14000000	3200000	16000000	80000000	8000000	0.719	1272.12	11	9400000	3.46667e+07	1	1	-0.271154
Q75UQ2	Craniofacial development protein 1 OS=Rattus norvegicus GN=Cfdp1 PE=1 SV=1	3.38983	1	7	1	1	295	32.949	4.83	NA	NA	2400000	8800000	NA	NA	0.101	145.596	1	2400000	8800000	0.333333	0.333333	-0.272727
Q7TP40	PEST proteolytic signal-containing nuclear protein OS=Rattus norvegicus GN=Pcnp PE=1 SV=1	11.6402	2	15	2	1	189	20.183	6.35	NA	NA	4100000	NA	15000000	NA	0.359	43.4243	2	4100000	15000000	0.333333	0.333333	-0.273333
F2Z3T4	Muscleblind-like protein 2 OS=Rattus norvegicus GN=Mbnl2 PE=1 SV=1	11.7962	5	106	1	1	373	40.13	9	NA	NA	2200000	8100000	8000000	8000000	1.404	472.555	5	2200000	8.03333e+06	0.333333	1	-0.273859
D4A9Y0	Protein Sdf2l1 OS=Rattus norvegicus GN=Sdf2l1 PE=1 SV=1	30.4545	4	18	4	1	220	23.389	7.42	NA	NA	5900000	NA	21000000	NA	0.719	327.918	4	5900000	21000000	0.333333	0.333333	-0.280952
P48508	Glutamate--cysteine ligase regulatory subunit OS=Rattus norvegicus GN=Gclm PE=1 SV=1	17.8832	4	15	4	1	274	30.529	5.52	NA	3100000	NA	11000000	NA	NA	0.668	219.476	4	3100000	11000000	0.333333	0.333333	-0.281818
D3ZKE1	Protein Uvrag OS=Rattus norvegicus GN=Uvrag PE=1 SV=3	3.29513	3	28	1	1	698	78.066	8.16	6100000	33000000	NA	46000000	87000000	NA	0.124	108.06	3	19550000	66500000	0.666667	0.666667	-0.293985
B5DFC3	Protein Sec23a OS=Rattus norvegicus GN=Sec23a PE=1 SV=1	27.451	16	159	14	1	765	86.106	7.08	39000000	13000000	8700000	47000000	63000000	95000000	1.099	2897.83	16	2.02333e+07	6.83333e+07	1	1	-0.296098
D4A702	Protein Synpo2 OS=Rattus norvegicus GN=Synpo2 PE=1 SV=2	9.03328	8	24	8	1	1262	135.941	8.51	NA	2600000	NA	8700000	NA	8300000	0.27	397.531	8	2600000	8500000	0.333333	0.666667	-0.305882
P50442	Glycine amidinotransferase, mitochondrial OS=Rattus norvegicus GN=Gatm PE=1 SV=1	10.4019	3	29	3	1	423	48.211	7.49	2500000	2900000	4400000	9300000	12000000	NA	0.225	301.97	3	3.26667e+06	10650000	1	0.666667	-0.306729
M0R919	Prefoldin subunit 3 OS=Rattus norvegicus GN=Vbp1 PE=1 SV=2	17.2043	3	37	3	1	186	20.916	5.73	5600000	2500000	3600000	11000000	19000000	8000000	0.54	967.403	3	3900000	1.26667e+07	1	1	-0.307895
F2Z3S9	Protein Nr2f1 OS=Rattus norvegicus GN=Nr2f1 PE=3 SV=1	3.33333	1	4	1	1	420	45.87	8.25	NA	1900000	NA	NA	5900000	NA	0.08	73.0625	1	1900000	5900000	0.333333	0.333333	-0.322034
Q68FR2	Bridging integrator 2 OS=Rattus norvegicus GN=Bin2 PE=1 SV=1	8.6785	4	30	3	1	507	55.085	4.88	13000000	NA	4500000	33000000	21000000	NA	0.283	206.174	4	8750000	27000000	0.666667	0.666667	-0.324074
Q498D8	Protein Rbx1 OS=Rattus norvegicus GN=Rbx1 PE=1 SV=1	24.0741	2	24	2	1	108	12.266	6.96	7900000	NA	5200000	28000000	28000000	4200000	1.154	301.325	2	6550000	2.00667e+07	0.666667	1	-0.326412
Q6P7C7	Transmembrane glycoprotein NMB OS=Rattus norvegicus GN=Gpnmb PE=2 SV=1	1.22378	1	35	1	1	572	63.691	7.11	17000000	NA	26000000	40000000	110000000	44000000	0.08	102.997	1	21500000	6.46667e+07	0.666667	1	-0.332474
Q03344	ATPase inhibitor, mitochondrial OS=Rattus norvegicus GN=Atpif1 PE=3 SV=2	17.757	2	12	2	1	107	12.24	9.6	8000000	NA	NA	NA	24000000	NA	0.52	49.1384	2	8000000	24000000	0.333333	0.333333	-0.333333
A0A0G2JYG5	Unconventional myosin-IXb OS=Rattus norvegicus GN=Myo9b PE=1 SV=1	1.28968	3	18	3	1	2016	229.089	8.21	NA	3600000	NA	18000000	12000000	1900000	0.04	227.838	3	3600000	1.06333e+07	0.333333	1	-0.338558
Q642B4	C-type lectin domain family 14, member a OS=Rattus norvegicus GN=Clec14a PE=1 SV=1	26.0684	9	74	9	1	468	50.147	7.12	16000000	14000000	4000000	7500000	9600000	83000000	1.212	1362.8	9	1.13333e+07	3.33667e+07	1	1	-0.33966
B1H262	Protein phosphatase 1, regulatory subunit 9B OS=Rattus norvegicus GN=Ppp1r9b PE=2 SV=1	8.07834	4	11	4	1	817	89.608	4.92	1500000	NA	NA	4400000	NA	NA	0.179	152.937	4	1500000	4400000	0.333333	0.333333	-0.340909
P13601	Aldehyde dehydrogenase, cytosolic 1 OS=Rattus norvegicus GN=Aldh1a7 PE=1 SV=2	31.3373	14	469	3	1	501	54.525	7.42	3600000	16000000	16000000	48000000	36000000	20000000	1.728	7946.15	14	1.18667e+07	3.46667e+07	1	1	-0.342308
Q4QRB4	Tubulin beta-3 chain OS=Rattus norvegicus GN=Tubb3 PE=1 SV=1	38	14	1268	2	0	450	50.386	4.93	NA	8000000	NA	26000000	27000000	17000000	7.318	36612.7	14	8000000	2.33333e+07	0.333333	1	-0.342857
A0A0G2K751	DnaJ homolog subfamily C member 8 OS=Rattus norvegicus GN=Dnajc8 PE=1 SV=1	12.6354	4	25	4	1	277	32.683	8.76	19000000	4500000	1500000	22000000	26000000	NA	0.425	171.504	4	8.33333e+06	24000000	1	0.666667	-0.347222
B5DF60	Eukaryotic translation initiation factor 1A, Y-linked OS=Rattus norvegicus GN=Eif1ax PE=1 SV=1	31.25	4	48	4	1	144	16.45	5.24	5100000	NA	14000000	33000000	32000000	17000000	1.61	764.759	4	9550000	2.73333e+07	0.666667	1	-0.34939
Q5DKU0	MHC class II antigen RT1.D beta chain OS=Rattus norvegicus PE=2 SV=1	30.6818	7	64	2	1	264	29.847	6.68	NA	NA	4400000	10000000	15000000	NA	1.462	679.108	7	4400000	12500000	0.333333	0.666667	-0.352
B2RYI8	Papss1 protein OS=Rattus norvegicus GN=Papss1 PE=2 SV=1	10.2564	4	34	4	1	624	70.742	6.83	1900000	2700000	NA	10000000	4400000	5100000	0.278	945.64	4	2300000	6500000	0.666667	1	-0.353846
P23711	Heme oxygenase 2 OS=Rattus norvegicus GN=Hmox2 PE=1 SV=1	20	4	29	4	1	315	35.74	5.49	3100000	NA	2600000	12000000	4000000	NA	0.374	80.0324	4	2850000	8000000	0.666667	0.666667	-0.35625
Q7TP06	Da1-6 OS=Rattus norvegicus GN=Cep192 PE=2 SV=1	2.48212	6	38	4	1	2377	260.919	5.94	NA	9000000	NA	NA	9000000	41000000	0.105	312.73	6	9000000	25000000	0.333333	0.666667	-0.36
A0A0G2KA38	Protein Isg20 OS=Rattus norvegicus GN=Isg20 PE=4 SV=1	15.1351	3	11	3	1	185	20.898	8.65	NA	1800000	NA	5900000	4100000	NA	0.389	46.9411	3	1800000	5000000	0.333333	0.666667	-0.36
M0R3V4	Protein Mydgf OS=Rattus norvegicus GN=Mydgf PE=1 SV=2	21.0843	3	43	3	1	166	17.941	6.16	5900000	5300000	20000000	29000000	25000000	32000000	1.154	383.915	3	10400000	2.86667e+07	1	1	-0.362791
F1MAQ7	Protein Son OS=Rattus norvegicus GN=Son PE=1 SV=2	1.83974	3	3	3	1	2446	265.95	5.57	NA	2000000	NA	NA	NA	5500000	0.061	36.5	3	2000000	5500000	0.333333	0.333333	-0.363636
F1SW39	PC4 and SFRS1 interacting protein 1 OS=Rattus norvegicus GN=Psip1 PE=1 SV=1	7.95455	4	26	3	1	528	59.579	9.13	8300000	NA	NA	28000000	17000000	NA	0.198	202.799	4	8300000	22500000	0.333333	0.666667	-0.368889
P23693	Troponin I, cardiac muscle OS=Rattus norvegicus GN=Tnni3 PE=1 SV=2	36.4929	6	32	6	1	211	24.145	9.55	NA	99000000	NA	12000000	8300000	NA	0.309	314.841	10	5000000	1.35333e+07	0.666667	1	-0.369458
Q5UT78	MHC class II antigen OS=Rattus norvegicus GN=RT1-Db PE=2 SV=1	28.0303	6	63	1	1	264	30.199	8.05	10000000	NA	NA	NA	27000000	NA	1.154	395.787	6	10000000	27000000	0.333333	0.333333	-0.37037
Q5FVK6	Coiled-coil and C2 domain-containing protein 1B OS=Rattus norvegicus GN=Cc2d1b PE=1 SV=2	1.88235	2	20	2	1	850	93.476	5.33	4300000	NA	2600000	9200000	NA	NA	0.073	34.3744	2	3450000	9200000	0.666667	0.333333	-0.375
B2RYJ3	Protein Cul4a OS=Rattus norvegicus GN=Cul4a PE=1 SV=1	11.5942	8	60	4	1	759	87.718	8.35	4100000	3000000	NA	12000000	6900000	NA	0.323	375.729	8	3550000	9450000	0.666667	0.666667	-0.375661
A0A0G2JW88	Microtubule-associated protein OS=Rattus norvegicus GN=Map4 PE=1 SV=1	15.7201	27	516	4	1	2201	233.25	5.62	15000000	5200000	8000000	42000000	28000000	5000000	0.599	7041.15	27	9400000	25000000	1	1	-0.376
D3ZQI1	Glutathione peroxidase OS=Rattus norvegicus GN=Gpx7 PE=1 SV=1	38.7097	5	48	5	1	186	21.076	7.85	6800000	11000000	NA	28000000	31000000	12000000	1.929	683.441	5	8900000	2.36667e+07	0.666667	1	-0.376056
P19944	60S acidic ribosomal protein P1 OS=Rattus norvegicus GN=Rplp1 PE=3 SV=1	57.0175	3	83	3	1	114	11.491	4.32	4200000	170000000	37000000	240000000	200000000	120000000	9	1032.63	3	70400000	1.86667e+08	1	1	-0.377143
Q9QYP8	A1b (Fragment) OS=Rattus norvegicus GN=RT1-A1b PE=2 SV=1	34.3931	11	256	3	0	346	39.288	5.63	NA	NA	64000000	79000000	260000000	NA	2.3	6212.66	11	64000000	169500000	0.333333	0.666667	-0.377581
A0A0G2JWB6	Protein Pxdn OS=Rattus norvegicus GN=Pxdn PE=1 SV=1	29.2881	33	454	33	1	1475	165.323	6.99	17000000	23000000	3300000	45000000	46000000	23000000	1.615	6287.88	33	1.44333e+07	38000000	1	1	-0.379825
A0A0G2JXZ3	Transcriptional regulator ATRX OS=Rattus norvegicus GN=Atrx PE=1 SV=1	0.484848	1	14	1	1	2475	279.187	6.9	2900000	5200000	NA	16000000	5300000	NA	0.012	44.1504	1	4050000	10650000	0.666667	0.666667	-0.380282
Q63030	Rat alpha-smooth muscle actin mRNA (Fragment) OS=Rattus norvegicus GN=Acta2 PE=2 SV=1	80	2	213	1	1	35	3.54	4.08	NA	NA	23000000	NA	NA	60000000	9	8105.43	2	23000000	60000000	0.333333	0.333333	-0.383333
G3V9N0	Polyadenylate-binding protein OS=Rattus norvegicus GN=Pabpc4 PE=1 SV=2	15.3727	8	87	2	1	644	70.789	9.26	4700000	NA	5300000	NA	13000000	NA	0.468	2021.59	8	5000000	13000000	0.666667	0.333333	-0.384615
Q5XIS9	Serine/threonine-protein kinase D2 OS=Rattus norvegicus GN=Prkd2 PE=1 SV=1	5.02857	4	21	4	1	875	96.436	6.86	NA	1500000	NA	NA	NA	3900000	0.175	97.4052	4	1500000	3900000	0.333333	0.333333	-0.384615
Q6AYF8	Protein Serpinb9 OS=Rattus norvegicus GN=Serpinb9 PE=1 SV=1	39.5722	13	223	12	1	374	42.274	5.86	18000000	24000000	29000000	85000000	64000000	35000000	2.039	4844.46	13	2.36667e+07	6.13333e+07	1	1	-0.38587
B1WBY1	Cul1 protein OS=Rattus norvegicus GN=Cul1 PE=1 SV=1	4.38144	4	13	4	1	776	89.635	8	4700000	NA	NA	4000000	30000000	2300000	0.133	37.3836	4	4700000	12100000	0.333333	1	-0.38843
Q99068	Alpha-2-macroglobulin receptor-associated protein OS=Rattus norvegicus GN=Lrpap1 PE=1 SV=2	20.5556	8	45	8	1	360	42.006	7.37	5800000	6500000	6100000	20000000	17000000	10000000	0.693	253.342	8	6.13333e+06	1.56667e+07	1	1	-0.391489
P50339	Chymase OS=Rattus norvegicus GN=Cma1 PE=2 SV=1	22.6721	4	21	4	1	247	27.551	9.38	3500000	530000	NA	NA	NA	5100000	0.719	230.349	4	2015000	5100000	0.666667	0.333333	-0.395098
Q5RJR9	Serine (Or cysteine) proteinase inhibitor, clade H, member 1, isoform CRA_b OS=Rattus norvegicus GN=Serpinh1 PE=1 SV=1	50.5995	18	743	1	1	417	46.532	8.82	100000000	120000000	34000000	280000000	250000000	110000000	6.444	17628	18	8.46667e+07	2.13333e+08	1	1	-0.396875
B0BNJ5	Endothelial differentiation-related factor 1 OS=Rattus norvegicus GN=Edf1 PE=1 SV=1	27.027	4	15	4	1	148	16.359	9.99	3000000	NA	NA	7400000	7600000	NA	0.778	44.3122	4	3000000	7500000	0.333333	0.666667	-0.4
M0RD63	Protein Ranbp3 OS=Rattus norvegicus GN=Ranbp3 PE=1 SV=2	13.6445	7	32	7	1	557	59.112	4.97	NA	2900000	NA	7800000	NA	6600000	0.546	434.237	7	2900000	7200000	0.333333	0.666667	-0.402778
Q63448	Peroxisomal acyl-coenzyme A oxidase 3 OS=Rattus norvegicus GN=Acox3 PE=1 SV=1	9	5	17	5	1	700	78.396	8.19	2300000	NA	NA	8500000	NA	2900000	0.238	237.414	5	2300000	5700000	0.333333	0.666667	-0.403509
P63074	Eukaryotic translation initiation factor 4E OS=Rattus norvegicus GN=Eif4e PE=1 SV=1	21.659	5	48	5	1	217	25.037	6.15	NA	21000000	18000000	9900000	35000000	100000000	1.371	560.616	5	19500000	48300000	0.666667	1	-0.403727
D4A7R3	Nucleoporin 205kDa (Predicted) OS=Rattus norvegicus GN=Nup205 PE=1 SV=1	6.97211	11	72	11	1	2008	227.086	6.32	2500000	3800000	1700000	4500000	12000000	3300000	0.215	975.773	11	2.66667e+06	6600000	1	1	-0.40404
F1M0U5	Protein Nbas OS=Rattus norvegicus GN=Nbas PE=1 SV=2	1.35766	2	11	2	1	2357	265.634	5.86	4900000	NA	NA	17000000	7100000	NA	0.027	46.932	2	4900000	12050000	0.333333	0.666667	-0.406639
A0A096MIX2	DEAD (Asp-Glu-Ala-Asp) box polypeptide 17, isoform CRA_a OS=Rattus norvegicus GN=Ddx17 PE=1 SV=1	42.9448	26	503	19	1	652	72.599	8.68	18000000	20000000	6400000	41000000	45000000	23000000	3.642	8550.9	26	14800000	3.63333e+07	1	1	-0.407339
Q6MG73	Complement component 2 OS=Rattus norvegicus GN=C2 PE=1 SV=1	14.9077	9	54	9	1	758	83.646	7.36	7800000	NA	17000000	45000000	41000000	5000000	0.498	466.661	9	12400000	3.03333e+07	0.666667	1	-0.408791
Q3B7D1	Ubiquitin-conjugating enzyme E2 Z OS=Rattus norvegicus GN=Ube2z PE=1 SV=2	14.3258	6	40	6	1	356	38.328	5.62	17000000	14000000	NA	33000000	12000000	68000000	1.069	126.037	6	15500000	3.76667e+07	0.666667	1	-0.411504
Q64598	Histone H2A type 1-F OS=Rattus norvegicus PE=3 SV=3	39.2308	6	643	2	1	130	14.167	11.05	2800000	2100000	NA	5500000	6400000	NA	3.329	8529.46	6	2450000	5950000	0.666667	0.666667	-0.411765
A0A0G2K8H6	Pro-cathepsin H OS=Rattus norvegicus GN=Ctsh PE=1 SV=1	43.5135	10	199	10	1	370	42.016	8.62	98000000	130000000	69000000	170000000	390000000	160000000	2.3	6042.65	10	99000000	240000000	1	1	-0.4125
R9PXZ3	Ankycorbin OS=Rattus norvegicus GN=Rai14 PE=1 SV=2	35.7218	31	276	31	1	949	105.932	5.92	20000000	17000000	6500000	43000000	49000000	12000000	1.525	3405.99	31	14500000	3.46667e+07	1	1	-0.418269
F1LM42	Protein Ank2 OS=Rattus norvegicus GN=Ank2 PE=1 SV=2	0.479193	2	20	2	0	3965	434.086	5.25	NA	6500000	NA	13000000	18000000	NA	0.016	412.184	2	6500000	15500000	0.333333	0.666667	-0.419355
Q9QXY4	Opioid growth factor receptor OS=Rattus norvegicus GN=Ogfr PE=1 SV=1	4.31034	2	21	2	1	580	64.688	4.69	NA	1700000	NA	1500000	6600000	NA	0.322	194.772	2	1700000	4050000	0.333333	0.666667	-0.419753
Q9Z336	Dynein light chain Tctex-type 1 OS=Rattus norvegicus GN=Dynlt1 PE=1 SV=1	30.0885	2	48	2	1	113	12.444	5.08	8200000	9900000	5000000	18000000	23000000	14000000	2.162	1089.57	2	7700000	1.83333e+07	1	1	-0.42
O88514	Beta-defensin 4 OS=Rattus norvegicus GN=Defb4 PE=2 SV=1	34.9206	2	47	2	1	63	6.942	9.61	44000000	68000000	9900000	74000000	150000000	65000000	3.642	787.971	2	4.06333e+07	9.63333e+07	1	1	-0.421799
D4A5A6	DNA-directed RNA polymerase subunit OS=Rattus norvegicus GN=Polr2a PE=1 SV=1	0.913706	2	14	2	1	1970	217.069	7.37	NA	2700000	NA	NA	6400000	NA	0.035	157.875	2	2700000	6400000	0.333333	0.333333	-0.421875
Q5PPG2	Legumain OS=Rattus norvegicus GN=Lgmn PE=1 SV=1	14.9425	4	68	4	1	435	49.448	6.58	9500000	14000000	20000000	28000000	55000000	20000000	0.682	1444.51	4	14500000	3.43333e+07	1	1	-0.42233
Q6TUG0	DnaJ homolog subfamily B member 11 OS=Rattus norvegicus GN=Dnajb11 PE=2 SV=1	17.5978	6	39	6	1	358	40.47	6.32	3400000	NA	8800000	8400000	25000000	9900000	0.655	458.891	6	6100000	1.44333e+07	0.666667	1	-0.422633
A0A0G2JSL0	Proteasome subunit beta type OS=Rattus norvegicus GN=rCG_63409 PE=3 SV=1	21.8487	5	84	5	1	238	25.287	5	20000000	14000000	8300000	42000000	34000000	24000000	1.738	1073.61	5	14100000	3.33333e+07	1	1	-0.423
D4A8G7	Protein Snw1 OS=Rattus norvegicus GN=Snw1 PE=1 SV=1	3.35821	2	6	2	1	536	61.425	9.52	NA	NA	2400000	6300000	7400000	3300000	0.087	37.5213	2	2400000	5.66667e+06	0.333333	1	-0.423529
B2RYC9	Glucosylceramidase OS=Rattus norvegicus GN=Gba PE=1 SV=1	7.37864	3	18	3	1	515	57.455	7.39	4800000	NA	5200000	16000000	NA	7600000	0.218	42.8006	3	5000000	11800000	0.666667	0.666667	-0.423729
G3V7I3	Cation-transporting ATPase OS=Rattus norvegicus GN=Atp13a1 PE=1 SV=1	8.43776	7	27	7	1	1197	131.831	8.07	NA	2300000	2300000	NA	7100000	3700000	0.23	172.37	7	2300000	5400000	0.666667	0.666667	-0.425926
B2RYF7	WAS protein family homolog 1 OS=Rattus norvegicus GN=Wash1 PE=2 SV=1	13.2632	4	14	4	1	475	51.295	5.52	2400000	NA	NA	7600000	5700000	3600000	0.389	110.651	4	2400000	5.63333e+06	0.333333	1	-0.426036
F1LQ09	Protein Atl2 OS=Rattus norvegicus GN=Atl2 PE=1 SV=1	8.06175	4	29	3	1	583	66.153	5.54	2500000	NA	NA	7200000	NA	4400000	0.259	114.344	4	2500000	5800000	0.333333	0.666667	-0.431034
F7FJQ3	Niemann Pick type C2 OS=Rattus norvegicus GN=Npc2 PE=1 SV=1	36.8421	9	304	9	1	152	16.738	7.93	210000000	230000000	87000000	430000000	480000000	310000000	7.254	2127.5	9	1.75667e+08	4.06667e+08	1	1	-0.431967
Q80UE2	Cytochrome P450 OS=Rattus norvegicus GN=Cyp1a1 PE=2 SV=1	9.07372	4	17	4	1	529	59.698	7.56	4300000	NA	NA	9900000	NA	NA	0.283	366.662	4	4300000	9900000	0.333333	0.333333	-0.434343
D4A4J0	Protein Supt16h OS=Rattus norvegicus GN=Supt16h PE=1 SV=1	14.5177	12	90	12	1	1047	119.79	5.66	6100000	6100000	3200000	12000000	19000000	4400000	0.364	744.197	12	5.13333e+06	11800000	1	1	-0.435028
Q6AYQ9	Peptidyl-prolyl cis-trans isomerase OS=Rattus norvegicus GN=Ppic PE=1 SV=1	8.49057	2	38	2	1	212	22.995	8.13	3200000	7600000	NA	12000000	15000000	10000000	0.311	534.119	2	5400000	1.23333e+07	0.666667	1	-0.437838
A0A0G2K509	Keratin, type II cytoskeletal 5 OS=Rattus norvegicus GN=Krt5 PE=1 SV=1	24.5347	14	183	8	0	591	62.753	6.83	48000000	25000000	34000000	100000000	94000000	50000000	1.228	3663.76	14	3.56667e+07	8.13333e+07	1	1	-0.438525
Q924S1	1-acyl-sn-glycerol-3-phosphate acyltransferase delta OS=Rattus norvegicus GN=Agpat4 PE=2 SV=1	7.14286	3	22	3	1	378	43.765	8.41	2500000	NA	NA	9100000	NA	2300000	0.25	226.262	3	2500000	5700000	0.333333	0.666667	-0.438596
F1LRP7	Protein argonaute-2 OS=Rattus norvegicus GN=Ago2 PE=1 SV=2	8.75	6	30	4	1	880	99.479	9.14	5000000	NA	1800000	6900000	8600000	NA	0.263	298.032	6	3400000	7750000	0.666667	0.666667	-0.43871
P85845	Fascin OS=Rattus norvegicus GN=Fscn1 PE=1 SV=2	41.5822	18	241	7	1	493	54.457	6.74	6500000	14000000	NA	18000000	30000000	22000000	2.44	5557.64	18	10250000	2.33333e+07	0.666667	1	-0.439286
Q14TE9	DNA topoisomerase 2 OS=Rattus norvegicus GN=Top2b PE=2 SV=1	15.9851	24	205	18	1	1614	181.852	7.94	15000000	23000000	7700000	45000000	49000000	9600000	0.547	1930.74	24	1.52333e+07	3.45333e+07	1	1	-0.44112
P13668	Stathmin OS=Rattus norvegicus GN=Stmn1 PE=1 SV=2	40.2685	6	73	6	1	149	17.278	5.97	51000000	56000000	15000000	130000000	93000000	48000000	1.254	1441.55	6	4.06667e+07	9.03333e+07	1	1	-0.450185
Q4KLH7	Protein Rad21 OS=Rattus norvegicus GN=Rad21 PE=1 SV=1	4.72441	3	22	3	1	635	71.947	4.64	8700000	NA	NA	26000000	24000000	7900000	0.194	239.837	3	8700000	19300000	0.333333	1	-0.450777
M0R781	Protein Dpp9 OS=Rattus norvegicus GN=Dpp9 PE=1 SV=1	2.20418	2	24	2	1	862	98.019	6.57	700000	3400000	2000000	5600000	3400000	NA	0.12	317.125	2	2.03333e+06	4500000	1	0.666667	-0.451852
Q66HC5	Nuclear pore complex protein Nup93 OS=Rattus norvegicus GN=Nup93 PE=1 SV=1	19.9023	13	101	13	1	819	93.243	5.72	4500000	4300000	2700000	6800000	12000000	6600000	0.543	709.593	13	3.83333e+06	8.46667e+06	1	1	-0.452756
A0A096MJ11	Gasdermin domain containing 1 (Predicted), isoform CRA_a OS=Rattus norvegicus GN=Gsdmd PE=1 SV=1	21.5164	9	69	9	1	488	53.179	4.93	6700000	10000000	2800000	14000000	18000000	11000000	1.043	1176.11	9	6500000	1.43333e+07	1	1	-0.453488
D3ZZK1	Protein LOC100359563 OS=Rattus norvegicus GN=LOC100359563 PE=3 SV=1	26.8908	3	66	3	1	119	13.345	9.8	36000000	49000000	44000000	110000000	130000000	44000000	1.424	1287.45	3	43000000	9.46667e+07	1	1	-0.454225
A4D0F6	Ac2-059 OS=Rattus norvegicus PE=2 SV=1	1.48196	3	12	3	0	1552	173.081	6.27	NA	NA	10000000	NA	22000000	NA	0.068	126.394	3	10000000	22000000	0.333333	0.333333	-0.454545
P22509	rRNA 2'-O-methyltransferase fibrillarin OS=Rattus norvegicus GN=Fbl PE=1 SV=2	22.63	6	64	6	1	327	34.201	10.24	5100000	NA	6800000	10000000	18000000	11000000	0.978	553.63	6	5950000	13000000	0.666667	1	-0.457692
P54001	Prolyl 4-hydroxylase subunit alpha-1 OS=Rattus norvegicus GN=P4ha1 PE=2 SV=2	11.6105	5	46	5	1	534	60.86	5.9	12000000	13000000	3000000	20000000	20000000	21000000	0.278	819.927	5	9.33333e+06	2.03333e+07	1	1	-0.459016
B1WC02	CTP synthase OS=Rattus norvegicus GN=Ctps1 PE=1 SV=1	16.5821	8	48	7	1	591	66.598	6.58	NA	2500000	3100000	7900000	5900000	4400000	0.52	557.228	8	2800000	6.06667e+06	0.666667	1	-0.461538
Q6TXF3	Acyl-CoA-binding protein OS=Rattus norvegicus GN=Dbi PE=1 SV=1	6.66667	3	112	3	1	600	66.408	8.72	87000000	54000000	24000000	140000000	150000000	67000000	0.278	1486.05	3	55000000	119000000	1	1	-0.462185
Q3KRC3	Signal recognition particle receptor ('docking protein') OS=Rattus norvegicus GN=Srpra PE=1 SV=1	9.1195	5	39	5	1	636	69.613	8.95	2700000	12000000	4300000	12000000	11000000	18000000	0.243	761.212	5	6.33333e+06	1.36667e+07	1	1	-0.462963
A0A023IM59	RT1-Da OS=Rattus norvegicus GN=DA1 PE=2 SV=1	16.4706	4	47	4	1	255	29.15	5.19	19000000	30000000	14000000	37000000	53000000	NA	0.624	1039.21	4	21000000	45000000	1	0.666667	-0.463415
G3V705	Polyglutamine binding protein 1, isoform CRA_a OS=Rattus norvegicus GN=Pqbp1 PE=1 SV=1	3.42205	1	2	1	1	263	30.497	6.23	NA	NA	3900000	NA	8300000	NA	0.116	25.5383	1	3900000	8300000	0.333333	0.333333	-0.466667
Q5XIP6	Flap endonuclease 1 OS=Rattus norvegicus GN=Fen1 PE=2 SV=1	7.36842	3	26	3	1	380	42.582	8.48	NA	4500000	4100000	12000000	11000000	4100000	0.241	55.4478	3	4300000	9.03333e+06	0.666667	1	-0.467647
A0A0G2JTV2	Non-muscle caldesmon OS=Rattus norvegicus GN=Cald1 PE=1 SV=1	30.9748	25	391	24	0	636	72.24	6.71	82000000	83000000	30000000	190000000	120000000	99000000	2.857	7527.74	25	65000000	1.36333e+08	1	1	-0.46875
G3V9E3	Caldesmon 1, isoform CRA_b OS=Rattus norvegicus GN=Cald1 PE=1 SV=1	37.4765	26	400	25	1	531	60.576	6.58	82000000	83000000	30000000	190000000	120000000	99000000	3.856	7585.41	26	65000000	1.36333e+08	1	1	-0.46988
Q920A6	Retinoid-inducible serine carboxypeptidase OS=Rattus norvegicus GN=Scpep1 PE=2 SV=1	23.8938	11	121	11	1	452	51.142	5.53	28000000	35000000	9600000	37000000	75000000	40000000	1.371	804.72	11	24200000	5.06667e+07	1	1	-0.474265
Q5M7V8	Thyroid hormone receptor-associated protein 3 OS=Rattus norvegicus GN=Thrap3 PE=1 SV=1	17.8759	16	138	16	1	951	108.188	10.15	8700000	10000000	5300000	17000000	21000000	12000000	0.601	1438.05	16	8000000	1.66667e+07	1	1	-0.475676
Q68FX8	Mitochondrial-processing peptidase subunit alpha OS=Rattus norvegicus GN=Pmpca PE=1 SV=1	10.8779	4	13	4	1	524	58.118	6.9	NA	NA	2800000	7000000	7000000	3300000	0.292	56.9382	4	2800000	5.76667e+06	0.333333	1	-0.476015
Q5VLR6	BWK3 OS=Rattus norvegicus GN=LOC366772 PE=2 SV=1	31.7427	11	141	6	1	482	52.353	5.11	63000000	150000000	22000000	140000000	270000000	73000000	1.683	3109.78	11	7.83333e+07	161000000	1	1	-0.476027
G3V702	Smu-1 suppressor of mec-8 and unc-52 homolog (C. elegans) OS=Rattus norvegicus GN=Smu1 PE=1 SV=1	30.9942	13	109	13	1	513	57.507	7.18	12000000	16000000	5300000	15000000	35000000	18000000	1.322	564.397	13	11100000	2.26667e+07	1	1	-0.476773
Q99N97	H-caldesmon (Fragment) OS=Rattus norvegicus GN=Cald1 PE=2 SV=1	14.5374	4	24	4	1	227	26.621	4.98	10000000	12000000	NA	48000000	12000000	11000000	0.557	563.797	4	11000000	2.36667e+07	0.666667	1	-0.576773
A0A0G2K714	Endophilin-B1 OS=Rattus norvegicus GN=Sh3glb1 PE=1 SV=1	23.6979	8	79	7	1	384	43.052	6.71	13000000	10000000	8200000	31000000	25000000	11000000	1.096	1410.48	8	10400000	2.23333e+07	1	1	-0.577083
A0A0G2K756	Acyl-Coenzyme A binding domain containing 3 OS=Rattus norvegicus GN=Acbd3 PE=1 SV=1	31.9392	11	63	11	1	526	60.283	5.01	1800000	NA	8000000	9600000	9400000	12000000	1.371	938.125	11	4900000	1.03333e+07	0.666667	1	-0.577632
F7EMB2	Protein RGD1304704 OS=Rattus norvegicus GN=RGD1304704 PE=1 SV=1	47.1311	10	117	10	1	244	28.153	6.89	7900000	10000000	5900000	8800000	20000000	19000000	2.02	1403.11	10	7.93333e+06	1.59333e+07	1	1	-0.578992
Q6P7D2	Arginyl aminopeptidase (Aminopeptidase B) OS=Rattus norvegicus GN=Rnpep PE=2 SV=1	40	20	281	20	1	650	72.557	5.67	21000000	31000000	23000000	110000000	39000000	13000000	2.981	4372.93	20	25000000	54000000	1	1	-0.679899
A0JPJ7	Obg-like ATPase 1 OS=Rattus norvegicus GN=Ola1 PE=2 SV=1	30.5556	10	31	10	1	396	44.507	7.77	4100000	5000000	6800000	16000000	14000000	4000000	0.896	171.101	10	5300000	1.13333e+07	1	1	-0.68
F1M863	Liprin-alpha-4 OS=Rattus norvegicus GN=Ppfia4 PE=1 SV=3	1.51899	2	12	1	0	1185	133.821	6.27	1500000	NA	NA	3200000	NA	NA	0.024	211.389	2	1500000	3200000	0.333333	0.333333	-0.680469
Q66H59	N-acetylneuraminate lyase OS=Rattus norvegicus GN=Npl PE=2 SV=1	13.125	2	27	2	1	320	35.093	6.93	NA	NA	4300000	5700000	12000000	9500000	0.222	268.161	2	4300000	9.06667e+06	0.333333	1	-0.6811
D4AE49	Protein Skiv2l2 OS=Rattus norvegicus GN=Skiv2l2 PE=1 SV=3	2.25141	2	16	2	1	1066	120.626	6.65	4400000	NA	NA	11000000	7500000	NA	0.06	81.2222	2	4400000	9250000	0.333333	0.666667	-0.683553
P20611	Lysosomal acid phosphatase OS=Rattus norvegicus GN=Acp2 PE=1 SV=1	12.0567	5	42	5	1	423	48.288	6.64	3800000	6800000	3300000	6400000	16000000	6800000	0.509	525.987	5	4.63333e+06	9.73333e+06	1	1	-0.683871
P50430	Arylsulfatase B OS=Rattus norvegicus GN=Arsb PE=2 SV=2	5.11364	3	32	3	1	528	58.922	6.6	6400000	9500000	7000000	16000000	21000000	11000000	0.241	280.211	3	7.63333e+06	16000000	1	1	-0.684211
Q6AYG5	Ethylmalonyl-CoA decarboxylase OS=Rattus norvegicus GN=Echdc1 PE=1 SV=1	24.4147	5	14	5	1	299	32.61	7.03	NA	5700000	NA	10000000	19000000	6700000	0.688	42.2603	5	5700000	11900000	0.333333	1	-0.685549
Q4KLJ8	Phosducin-like protein 3 OS=Rattus norvegicus GN=Pdcl3 PE=1 SV=1	16.6667	4	53	4	1	240	27.682	4.77	6200000	7400000	5500000	18000000	17000000	4800000	0.468	1084.56	4	6.36667e+06	1.32667e+07	1	1	-0.685567
D3ZQ59	Nardilysin OS=Rattus norvegicus GN=Nrd1 PE=1 SV=1	6.02116	7	33	7	1	1229	140.644	4.91	NA	5800000	2400000	11000000	9600000	5000000	0.22	268.046	7	4100000	8.53333e+06	0.666667	1	-0.686542
Q56A27	Nuclear cap-binding protein subunit 1 OS=Rattus norvegicus GN=Ncbp1 PE=1 SV=1	10	6	41	6	1	790	91.852	6.64	1700000	3000000	2300000	NA	5200000	4500000	0.341	484.873	6	2.33333e+06	4850000	1	0.666667	-0.689083
Q68FW9	COP9 signalosome complex subunit 3 OS=Rattus norvegicus GN=Cops3 PE=1 SV=1	27.6596	8	53	8	1	423	47.828	6.65	6600000	4400000	3700000	12000000	15000000	3400000	0.911	489.469	8	4900000	1.01333e+07	1	1	-0.689706
Q5U355	Itfg1 protein OS=Rattus norvegicus GN=Itfg1 PE=1 SV=1	4.59016	2	9	2	1	610	67.329	5.67	2000000	NA	NA	4900000	4600000	2900000	0.179	79.0196	2	2000000	4.13333e+06	0.333333	1	-0.689899
P24268	Cathepsin D OS=Rattus norvegicus GN=Ctsd PE=1 SV=1	38.3292	13	517	13	1	407	44.652	7.09	180000000	200000000	80000000	270000000	470000000	210000000	3.037	6540.74	13	1.53333e+08	3.16667e+08	1	1	-0.764789
Q04462	Valine--tRNA ligase OS=Rattus norvegicus GN=Vars PE=2 SV=2	21.2025	23	165	23	1	1264	140.28	7.61	3100000	25000000	19000000	21000000	54000000	22000000	0.823	1355.85	23	15700000	3.23333e+07	1	1	-0.765672
D4A022	Protein Gapvd1 OS=Rattus norvegicus GN=Gapvd1 PE=1 SV=3	4.1779	6	36	6	1	1484	165.06	5.19	4200000	3900000	3100000	8700000	9400000	4800000	0.153	129.631	6	3.73333e+06	7.63333e+06	1	1	-0.791429
P69897	Tubulin beta-5 chain OS=Rattus norvegicus GN=Tubb5 PE=1 SV=1	81.3063	24	2856	4	1	444	49.639	4.89	270000000	570000000	130000000	830000000	770000000	380000000	99	68119.2	24	3.23333e+08	660000000	1	1	-0.794505
B0BNB0	Golt1b protein OS=Rattus norvegicus GN=Golt1b PE=1 SV=1	18.1159	2	59	2	1	138	15.383	10.36	11000000	18000000	5400000	33000000	23000000	14000000	0.668	2858.22	2	1.14667e+07	2.33333e+07	1	1	-0.794737
A0A0G2KAM4	Fascin OS=Rattus norvegicus GN=Fscn1 PE=1 SV=1	28.8618	12	210	1	1	492	53.848	7.4	15000000	NA	NA	28000000	46000000	17000000	1.637	5878.36	12	15000000	3.03333e+07	0.333333	1	-0.870085
Q642A7	Protein FAM151A OS=Rattus norvegicus GN=Fam151a PE=2 SV=1	4.44079	3	4	3	1	608	67.145	6.73	NA	4700000	NA	9500000	NA	NA	0.218	66.9	3	4700000	9500000	0.333333	0.333333	-0.874194
Q4KMA8	Endoplasmic reticulum aminopeptidase 1 OS=Rattus norvegicus GN=Erap1 PE=1 SV=1	31.0753	24	301	24	1	930	106.367	6.51	19000000	23000000	13000000	44000000	50000000	23000000	1.496	4222.33	24	1.83333e+07	39000000	1	1	-0.896296
Q6IFZ5	Protein Krt76 OS=Rattus norvegicus GN=Krt76 PE=2 SV=1	8.77797	8	184	2	0	581	61.721	8.38	19000000	32000000	16000000	NA	45000000	NA	0.554	1298.24	8	2.23333e+07	45000000	1	0.333333	-0.897908
O88794	Pyridoxine-5'-phosphate oxidase OS=Rattus norvegicus GN=Pnpo PE=1 SV=1	10.3448	3	17	3	1	261	30.165	8.41	12000000	13000000	NA	NA	25000000	NA	0.334	336.717	3	12500000	25000000	0.666667	0.333333	-0.914477
P45592	Cofilin-1 OS=Rattus norvegicus GN=Cfl1 PE=1 SV=3	78.9157	15	737	12	1	166	18.521	8.09	420000000	370000000	320000000	930000000	920000000	370000000	53.117	16003.1	15	370000000	740000000	1	1	-0.921425

## Sheet: ALI-D3 vs Sham-D3
Accession	Description	Coverage	# Peptides	# PSMs	# Unique Peptides	# Protein Groups	# AAs	MW [kDa]	calc. pI	16p	18p	53p	13p	15p	52p	emPAI	Score Mascot	# Peptides Mascot	Group_ALI_D3.average	Group_Sham_D3.average	Group_ALI_D3.call.percent	Group_Sham_D3.call.percent	Group_ALI_D3.vs.Group_Sham_D3.FC
D3ZKE1	Protein Uvrag OS=Rattus norvegicus GN=Uvrag PE=1 SV=3	3.29513	3	28	1	1	698	78.066	8.16	53000000	NA	NA	4600000	3200000	5200000	0.124	108.06	3	53000000	4.33333e+06	0.333333	1	12.2308	0.940828
Q8MHH3	MHC class I RT1-Au heavy chain (Fragment) OS=Rattus norvegicus PE=2 SV=1	42.6752	6	134	2	0	157	17.771	5.63	NA	NA	83000000	NA	7600000	6100000	1.371	4584.25	6	83000000	6850000	0.333333	0.666667	12.1168	0.932061
D3ZRN3	Connective tissue growth factor OS=Rattus norvegicus PE=1 SV=1	24.2021	10	1555	3	1	376	41.936	5.49	140000000	4400000000	130000000	130000000	170000000	150000000	4.878	33294.7	10	1.55667e+09	150000000	1	1	10.3778	0.798291
D4A582	Protein Zdbf2 OS=Rattus norvegicus GN=Zdbf2 PE=4 SV=3	0.631313	2	14	2	1	2376	261.789	5.08	NA	41000000	230000000	NA	33000000	2100000	0.032	57.5137	2	135500000	17550000	0.666667	0.666667	7.7208	0.593908
Q5XIE8	Integral membrane protein 2B OS=Rattus norvegicus GN=Itm2b PE=2 SV=1	4.88722	1	14	1	1	266	30.294	5.3	NA	NA	18000000	1300000	3100000	2800000	0.245	129.319	1	18000000	2400000	0.333333	1	7.5	0.576923
D4AC12	Ankyrin repeat and SAM domain containing 1 (Predicted) OS=Rattus norvegicus GN=Anks1a PE=1 SV=1	2.22222	2	11	2	1	1125	122.022	5.95	NA	NA	45000000	6100000	NA	NA	0.062	26.67	2	45000000	6100000	0.333333	0.333333	7.37705	0.567465
D4A8L5	Adenylyltransferase and sulfurtransferase MOCS3 OS=Rattus norvegicus GN=Mocs3 PE=1 SV=1	3.49345	1	5	1	1	458	49.358	6.9	29000000	NA	4200000	NA	2600000	NA	0.16	0	1	16600000	2600000	0.666667	0.333333	6.38462	0.491124
F1LRV6	GMP reductase OS=Rattus norvegicus GN=Gmpr PE=3 SV=1	8.4058	2	14	2	1	345	37.434	6.98	14000000	14000000	NA	2500000	NA	1900000	0.194	53.79	2	14000000	2200000	0.666667	0.666667	6.36364	0.48951
D3ZES2	Protein Trappc6b OS=Rattus norvegicus GN=Trappc6b PE=1 SV=1	19.6203	3	9	3	1	158	17.965	8.68	NA	15000000	NA	2400000	NA	NA	0.501	43.0243	3	15000000	2400000	0.333333	0.333333	6.25	0.480769
A0A0G2K2Z0	Protein Eml4 OS=Rattus norvegicus GN=Eml4 PE=1 SV=1	19.6937	15	165	14	1	914	101.834	6.92	51000000	5200000	64000000	5900000	7300000	6600000	0.749	2120.39	15	4.00667e+07	6600000	1	1	6.07071	0.466977
Q4FZT0	Stomatin-like protein 2, mitochondrial OS=Rattus norvegicus GN=Stoml2 PE=1 SV=1	28.8952	7	62	7	1	353	38.39	8.63	5900000	200000000	5800000	11000000	12000000	12000000	0.905	1360.94	7	7.05667e+07	1.16667e+07	1	1	6.04857	0.465275
Q7TPJ1	Ac2-233 OS=Rattus norvegicus GN=Igtp PE=2 SV=1	13.2774	11	43	5	1	1431	161.531	6.54	NA	61000000	9100000	NA	6900000	NA	0.279	187.391	11	35050000	6900000	0.666667	0.333333	5.07971	0.390747
Q6P762	Alpha-mannosidase OS=Rattus norvegicus GN=Man2b1 PE=1 SV=1	8.6224	6	29	6	1	1009	114.255	8.66	NA	9300000	120000000	NA	NA	3800000	2.162	639.817	2	120000000	24000000	0.333333	0.333333	5	0.384615
P63074	Eukaryotic translation initiation factor 4E OS=Rattus norvegicus GN=Eif4e PE=1 SV=1	21.659	5	48	5	1	217	25.037	6.15	130000000	NA	27000000	NA	NA	17000000	1.371	560.616	5	78500000	17000000	0.666667	0.333333	4.61765	0.355204
Q68FQ9	LanC lantibiotic synthetase component C-like 2 (Bacterial) OS=Rattus norvegicus GN=Lancl2 PE=1 SV=1	7.55556	3	8	3	1	450	50.936	7.46	2400000	2200000	6300000	800000	NA	NA	0.259	91.0403	3	3.63333e+06	800000	1	0.333333	4.54167	0.349359
G3V6B0	Protein LOC103689979 OS=Rattus norvegicus GN=Pdxdc1 PE=1 SV=1	8.40764	5	49	5	1	785	86.916	5.53	15000000	6900000	91000000	15000000	6500000	5000000	0.243	556.736	5	3.76333e+07	8.83333e+06	1	1	4.26038	0.327721
D3ZRN3	Protein Actbl2 OS=Rattus norvegicus GN=Actbl2 PE=1 SV=1	24.2021	10	1555	3	1	376	41.936	5.49	5600000000	5100000000	2800000000	180000000	190000000	3500000000	0.212	91.7759	4	16000000	3800000	0.333333	0.333333	4.21053	0.323887
A0A0G2JSJ1	Tumor-associated calcium signal transducer 2 OS=Rattus norvegicus GN=Tacstd2 PE=4 SV=1	7.88644	3	20	3	1	317	35.477	8.6	12000000	NA	18000000	3700000	3700000	NA	0.369	177.795	3	15000000	3700000	0.666667	0.666667	4.05405	0.31185
Q76LU9	Glutathione peroxidase OS=Rattus norvegicus GN=Gpx4 PE=2 SV=2	17.3913	4	24	4	1	253	29.244	10.29	15000000	14000000	NA	NA	3600000	NA	0.445	327.68	4	14500000	3600000	0.666667	0.333333	4.02778	0.309829
O54924	Exocyst complex component 8 OS=Rattus norvegicus GN=Exoc8 PE=1 SV=1	10.8939	6	22	6	1	716	80.992	5.4	NA	NA	8700000	2400000	2300000	1800000	0.259	190.45	6	8700000	2.16667e+06	0.333333	1	4.01538	0.308876
A0A0G2JUF9	Protein Nckap1l OS=Rattus norvegicus GN=Nckap1l PE=1 SV=1	5.46737	4	16	4	1	1134	129	6.64	NA	NA	7600000	NA	2000000	NA	0.149	121.273	4	7600000	2000000	0.333333	0.333333	3.8	0.292308
P07483	Fatty acid-binding protein, heart OS=Rattus norvegicus GN=Fabp3 PE=1 SV=2	48.8722	6	45	6	1	133	14.766	6.33	NA	150000000	NA	16000000	7300000	NA	0.562	258.575	6	9500000	2600000	0.333333	0.666667	3.65385	0.281065
D4ADD7	Glutaredoxin 5 homolog (S. cerevisiae) (Predicted), isoform CRA_b OS=Rattus norvegicus GN=Glrx5 PE=1 SV=1	33.5526	5	56	4	1	152	16.422	7.28	23000000	20000000	67000000	4800000	3100000	23000000	1.683	673.658	5	3.66667e+07	10300000	1	1	3.55987	0.273836
D4A3X3	Interferon, alpha-inducible protein (Clone IFI-15K) (Predicted) OS=Rattus norvegicus GN=Isg15 PE=1 SV=1	52.1739	5	47	5	1	161	18.213	8.02	NA	NA	35000000	NA	20000000	1600000	2.511	360.462	5	35000000	10800000	0.333333	0.666667	3.24074	0.249288
Q920H8	Hephaestin OS=Rattus norvegicus GN=Heph PE=1 SV=1	1.1236	1	6	1	1	1157	129.511	6.15	73000000	NA	NA	NA	NA	2600000	0.105	107.929	7	5500000	1700000	1	0.333333	3.23529	0.248869
D3ZBB3	Protein Tmem47 OS=Rattus norvegicus GN=Tmem47 PE=1 SV=1	14.9171	3	17	3	1	181	19.955	6.73	10000000	NA	8300000	NA	NA	2900000	1.683	247.067	3	9150000	2900000	0.666667	0.333333	3.15517	0.242706
Q5XI80	SP100 nuclear antigen OS=Rattus norvegicus GN=Sp100 PE=2 SV=1	17.2515	5	45	2	1	342	38.381	5.45	NA	NA	23000000	NA	7300000	NA	0.65	255.271	5	23000000	7300000	0.333333	0.333333	3.15068	0.24236
Q5UT97	MHC class II antigen OS=Rattus norvegicus GN=RT1-Bb PE=2 SV=1	28.5171	6	59	2	0	263	30.089	7.83	NA	18000000	NA	NA	5900000	NA	1.336	536.163	6	18000000	5900000	0.333333	0.333333	3.05085	0.234681
Q6P742	Proteolipid protein 2 OS=Rattus norvegicus GN=Plp2 PE=2 SV=1	7.94702	1	27	1	1	151	16.546	7.17	220000000	140000000	190000000	160000000	15000000	11000000	0.389	136.456	1	1.83333e+08	62000000	1	1	2.95699	0.227461
Q4V797	Interferon-gamma-inducible GTPase Ifgga1 protein OS=Rattus norvegicus GN=RGD1309362 PE=1 SV=1	32.6139	11	66	6	1	417	48.241	7.47	NA	NA	10000000	NA	3400000	NA	0.983	762.614	11	10000000	3400000	0.333333	0.333333	2.94118	0.226244
D3ZCV0	Protein Actn2 OS=Rattus norvegicus GN=Actn2 PE=1 SV=1	43.2886	33	619	20	1	894	103.768	5.45	NA	58000000	NA	4600000	NA	NA	5.449	12097.9	14	5.96667e+08	2.03333e+08	1	1	2.93443	0.225725
D3ZJF9	Protein Gla OS=Rattus norvegicus GN=Gla PE=1 SV=2	5.71429	2	9	2	1	420	47.543	5.72	7000000	NA	NA	NA	2400000	NA	0.318	21.96	2	7000000	2400000	0.333333	0.333333	2.91667	0.224359
D3ZZM3	Component of oligomeric golgi complex 4 (Predicted) OS=Rattus norvegicus GN=Cog4 PE=1 SV=1	1.01911	1	11	1	1	785	88.546	5.15	NA	NA	6400000	2200000	NA	NA	0.036	30.11	1	6400000	2200000	0.333333	0.333333	2.90909	0.223776
Q01129	Decorin OS=Rattus norvegicus GN=Dcn PE=1 SV=1	36.7232	13	218	12	1	354	39.78	8.79	47000000	69000000	30000000	18000000	15000000	18000000	2.562	2300.27	13	4.86667e+07	17000000	1	1	2.86275	0.220211
Q498D8	Protein Rbx1 OS=Rattus norvegicus GN=Rbx1 PE=1 SV=1	24.0741	2	24	2	1	108	12.266	6.96	19000000	NA	NA	8300000	5100000	NA	1.154	301.325	2	19000000	6700000	0.333333	0.666667	2.83582	0.21814
D3ZXF9	Protein Mrpl12 OS=Rattus norvegicus GN=Mrpl12 PE=1 SV=1	10.5072	3	23	3	1	276	29.423	9.66	14000000	13000000	NA	4800000	NA	NA	0.52	93.6106	3	13500000	4800000	0.666667	0.333333	2.8125	0.216346
Q4QQV4	Dead end homolog 1 (Zebrafish) OS=Rattus norvegicus GN=Hars PE=1 SV=1	37.7953	18	197	18	1	508	57.324	6.11	21000000	130000000	17000000	16000000	20000000	24000000	1.537	2176.17	18	56000000	20000000	1	1	2.8	0.215385
G3V617	Mitogen-activated protein kinase OS=Rattus norvegicus GN=Mapk14 PE=1 SV=1	24.7222	8	116	7	1	360	41.247	5.88	72000000	NA	3000000	7900000	11000000	4700000	0.093	165.58	4	6800000	2.46667e+06	0.333333	1	2.75676	0.212058
P23347	Anion exchange protein 2 OS=Rattus norvegicus GN=Slc4a2 PE=1 SV=1	3.16045	3	24	3	1	1234	136.55	6.1	5300000	1800000	5900000	1300000	1400000	2100000	0.094	270.472	3	4.33333e+06	1600000	1	1	2.70833	0.208333
B0BNJ5	Endothelial differentiation-related factor 1 OS=Rattus norvegicus GN=Edf1 PE=1 SV=1	27.027	4	15	4	1	148	16.359	9.99	4600000	NA	NA	1700000	NA	NA	0.778	44.3122	4	4600000	1700000	0.333333	0.333333	2.70588	0.208145
G3V7E3	Granzyme A OS=Rattus norvegicus GN=Gzma PE=1 SV=1	14.5594	3	15	3	1	261	28.476	9	NA	NA	7200000	NA	2700000	NA	0.389	204.86	3	7200000	2700000	0.333333	0.333333	2.66667	0.205128
B4F777	High mobility group nucleosome-binding domain-containing protein 5 OS=Rattus norvegicus GN=Hmgn5 PE=2 SV=1	11.1888	4	31	4	1	429	48.576	4.37	19000000	NA	25000000	13000000	7000000	5100000	0.233	154.335	4	22000000	8.36667e+06	0.666667	1	2.62948	0.202268
P06238	Alpha-2-macroglobulin OS=Rattus norvegicus GN=A2m PE=2 SV=2	46.9429	55	373	19	1	1472	163.682	6.29	NA	NA	300000000	8100000	NA	NA	0.041	133.01	1	5900000	2300000	1	0.333333	2.56522	0.197324
D3ZDZ1	Amyloid beta (A4) protein-binding, family B, member 1 interacting protein OS=Rattus norvegicus GN=Apbb1ip PE=1 SV=2	16.8675	9	31	9	1	664	73.629	5.4	7600000	6700000	6800000	3600000	1900000	NA	0.632	154.748	9	7.03333e+06	2750000	1	0.666667	2.55758	0.196737
Q5XHZ0	Heat shock protein 75 kDa, mitochondrial OS=Rattus norvegicus GN=Trap1 PE=1 SV=1	25.0708	15	97	14	1	706	80.411	7.03	540000000	490000000	620000000	170000000	160000000	330000000	0.892	2739.13	15	550000000	220000000	1	1	2.5	0.192308
D3ZXP3	Histone H2A OS=Rattus norvegicus GN=H2afx PE=1 SV=1	37.7622	5	489	1	1	143	15.105	10.74	970000	NA	56000000	NA	16000000	7100000	2.162	8766.43	5	28485000	11550000	0.666667	0.666667	2.46623	0.18971
Q6P7D2	Arginyl aminopeptidase (Aminopeptidase B) OS=Rattus norvegicus GN=Rnpep PE=2 SV=1	40	20	281	20	1	650	72.557	5.67	30000000	18000000	97000000	18000000	22000000	19000000	2.981	4372.93	20	4.83333e+07	1.96667e+07	1	1	2.45763	0.189048
G3V6S1	PRKC apoptosis WT1 regulator protein OS=Rattus norvegicus GN=Pawr PE=1 SV=1	15.3614	4	13	4	1	332	35.832	5.74	14000000	NA	NA	NA	7100000	4300000	0.585	33.81	4	14000000	5700000	0.333333	0.666667	2.45614	0.188934
G3V8W2	Phosphatidate cytidylyltransferase OS=Rattus norvegicus GN=Cds2 PE=1 SV=1	8.78378	3	23	3	1	444	51.402	7.05	20000000	31000000	22000000	NA	10000000	NA	0.445	565.141	3	2.43333e+07	10000000	1	0.333333	2.43333	0.187179
F1M446	Protein AI314180 OS=Rattus norvegicus GN=AI314180 PE=1 SV=3	3.69766	6	32	6	1	1839	203.79	7.14	NA	NA	5100000	NA	NA	2100000	0.098	153.584	6	5100000	2100000	0.333333	0.333333	2.42857	0.186813
G3V615	Complement factor B, isoform CRA_b OS=Rattus norvegicus GN=Cfb PE=1 SV=1	49.1481	31	538	31	1	763	85.299	6.96	46000000	51000000	420000000	80000000	79000000	47000000	1.86	16181.6	41	11000000	4550000	0.333333	0.666667	2.41758	0.185968
Q6AYS8	Estradiol 17-beta-dehydrogenase 11 OS=Rattus norvegicus GN=Hsd17b11 PE=2 SV=1	26.1745	7	111	7	1	298	32.917	8.63	35000000	16000000	23000000	8200000	9900000	13000000	1.848	1564.39	7	2.46667e+07	1.03667e+07	1	1	2.37942	0.183032
Q4KLG2	GTPase IMAP family member 8 OS=Rattus norvegicus GN=Gimap8 PE=2 SV=1	18.0233	7	30	7	1	688	77.023	8.19	NA	NA	14000000	NA	6000000	NA	0.327	138.718	7	14000000	6000000	0.333333	0.333333	2.33333	0.179487
B0BNC0	Ckmt2 protein OS=Rattus norvegicus GN=Ckmt2 PE=2 SV=1	44.6301	15	112	13	1	419	47.443	8.4	NA	85000000	NA	4700000	NA	NA	2.981	1239.54	3	3.96667e+07	17100000	1	1	2.31969	0.178438
Q4KLZ6	Triokinase/FMN cyclase OS=Rattus norvegicus GN=Tkfc PE=1 SV=1	5.0173	3	26	3	1	578	59.406	7.52	6400000	5600000	2500000	NA	2200000	2000000	0.194	258.184	3	4.83333e+06	2100000	1	0.666667	2.30159	0.177045
P42346	Serine/threonine-protein kinase mTOR OS=Rattus norvegicus GN=Mtor PE=1 SV=1	2.94233	6	24	6	1	2549	288.61	7.17	4300000	4200000	NA	1600000	1100000	2900000	0.073	162.517	6	4250000	1.86667e+06	0.666667	1	2.27679	0.175137
B5DEH0	LIM domain-containing protein 1 OS=Rattus norvegicus GN=Limd1 PE=1 SV=1	20.2112	8	27	8	1	663	71.347	6.29	11000000	NA	13000000	NA	3800000	6800000	0.725	150.877	8	12000000	5300000	0.666667	0.666667	2.26415	0.174165
D3ZD89	NMDA receptor-regulated gene 1 (Predicted), isoform CRA_b OS=Rattus norvegicus GN=Naa15 PE=1 SV=2	7.16763	4	14	4	1	865	100.946	7.61	9500000	10000000	NA	1700000	7100000	NA	0.114	19.13	4	9750000	4400000	0.666667	0.666667	2.21591	0.170455
F1LNL2	Protein Smarca5 OS=Rattus norvegicus GN=Smarca5 PE=1 SV=2	11.5578	10	48	10	1	995	116.581	8.41	NA	7800000	2200000	6600000	30000000	4000000	0.059	33.5443	3	2850000	1300000	0.666667	0.333333	2.19231	0.168639
Q6IFZ5	Protein Krt76 OS=Rattus norvegicus GN=Krt76 PE=2 SV=1	8.77797	8	184	2	0	581	61.721	8.38	44000000	43000000	13000000	NA	12000000	19000000	0.554	1298.24	8	3.33333e+07	15500000	1	0.666667	2.15054	0.165426
A0A0G2K1G5	Transforming growth factor beta binding protein 2, isoform CRA_a OS=Rattus norvegicus GN=Ltbp2 PE=1 SV=1	7.80994	11	28	11	1	1831	196.993	5.29	NA	25000000	NA	9100000	1300000	6400000	1.683	4671.88	15	48000000	2.23333e+07	1	1	2.14925	0.165327
A0A0G2K6S9	Myosin-11 OS=Rattus norvegicus GN=Myh11 PE=1 SV=1	59.424	125	3412	1	1	1979	227.906	5.49	NA	21000000	NA	4700000	NA	15000000	8.253	68292.5	125	21000000	9850000	0.333333	0.666667	2.13198	0.163998
A0A0G2JXC1	Protein ERGIC-53 OS=Rattus norvegicus GN=Lman1 PE=1 SV=1	27.0793	10	160	2	1	517	58.059	6.49	NA	57000000	NA	NA	NA	27000000	1.198	2374.82	10	57000000	27000000	0.333333	0.333333	2.11111	0.162393
B0BN30	Mtch1 protein OS=Rattus norvegicus GN=Mtch1 PE=1 SV=1	12.8535	5	21	5	1	389	41.565	9.32	19000000	NA	26000000	17000000	4500000	11000000	0.532	227.715	5	22500000	1.08333e+07	0.666667	1	2.07692	0.159763
Q5MYX2	2 '-5 ' oligoadenylate synthetase 1K OS=Rattus norvegicus GN=Oas1k PE=2 SV=1	22.9462	7	23	5	1	353	40.647	8.95	NA	NA	11000000	NA	5300000	NA	0.711	378.289	7	11000000	5300000	0.333333	0.333333	2.07547	0.159652
A0A096XKT9	NADH-ubiquinone oxidoreductase chain 5 OS=Rattus norvegicus GN=ND5 PE=3 SV=1	7.71757	3	18	3	1	609	68.538	9.26	7500000	16000000	NA	8200000	4000000	4800000	0.292	166.406	3	11750000	5.66667e+06	0.666667	1	2.07353	0.159502
Q4VBH1	Ighg protein OS=Rattus norvegicus GN=Ighg PE=1 SV=1	26.7666	8	196	5	1	467	51.618	6.6	33000000	NA	450000000	8000000	NA	NA	0.022	74.3466	1	3900000	1900000	0.333333	0.333333	2.05263	0.157895
F1LNL2	Protein Smarca5 OS=Rattus norvegicus GN=Smarca5 PE=1 SV=2	11.5578	10	48	10	1	995	116.581	8.41	55000000	4000000	43000000	25000000	19000000	5800000	0.309	314.841	10	34000000	16600000	1	1	2.04819	0.157553
G3V667	Integrin, alpha 6, isoform CRA_a OS=Rattus norvegicus GN=Itga6 PE=1 SV=1	5.31221	5	36	5	1	1073	119.404	7.06	7300000	7700000	6700000	5000000	2600000	3000000	0.145	583.295	5	7.23333e+06	3.53333e+06	1	1	2.04717	0.157475
Q5I0E1	Leucine-rich alpha-2-glycoprotein 1 OS=Rattus norvegicus GN=Lrg1 PE=2 SV=1	18.3735	5	22	5	1	332	36.297	7.23	NA	NA	21000000	NA	2100000	NA	0.334	117.538	4	7.76667e+06	3800000	1	0.666667	2.04386	0.15722
P16303	Carboxylesterase 1D OS=Rattus norvegicus GN=Ces1d PE=1 SV=2	43.0088	23	1103	7	1	565	62.108	6.54	560000000	390000000	520000000	210000000	240000000	270000000	7.767	15860	23	490000000	240000000	1	1	2.04167	0.157051
A0A0G2JY66	Carboxylic ester hydrolase OS=Rattus norvegicus GN=Ces1d PE=1 SV=1	38.6525	21	945	7	0	564	62.025	6.42	560000000	390000000	520000000	210000000	240000000	270000000	7.209	13223.1	21	490000000	240000000	1	1	2.04167	0.157051
P43278	Histone H1.0 OS=Rattus norvegicus GN=H1f0 PE=2 SV=2	27.3196	5	139	5	1	194	20.872	10.9	200000000	170000000	300000000	90000000	180000000	59000000	0.874	1532.44	5	2.23333e+08	1.09667e+08	1	1	2.03647	0.156652
G3V703	Protein unc-13 homolog D OS=Rattus norvegicus GN=Unc13d PE=1 SV=1	7.99632	8	52	7	1	1088	123.348	6.62	9300000	3800000	8600000	3900000	2100000	4700000	0.287	206.614	8	7.23333e+06	3.56667e+06	1	1	2.02804	0.156003
G3V8P5	Protein RGD1310127 OS=Rattus norvegicus GN=RGD1310127 PE=1 SV=1	8.15451	3	16	3	1	466	50.806	7.28	NA	5500000	7500000	1900000	NA	4600000	0.304	199.429	3	6500000	3250000	0.666667	0.666667	2	0.153846
Q9Z0L9	Decay accelarating factor 1, isoform CRA_c OS=Rattus norvegicus GN=Cd55 PE=2 SV=1	7.93991	3	22	3	1	466	52.059	8.98	9000000	4600000	NA	3800000	3000000	NA	0.417	182.784	3	6800000	3400000	0.666667	0.666667	2	0.153846
O88752	Epsilon 1 globin OS=Rattus norvegicus GN=Hbe1 PE=1 SV=1	12.2449	2	189	1	1	147	16.094	8.18	NA	8600000	NA	86000000	NA	NA	1.031	2859.79	2	8600000	86000000	0.333333	0.333333	0.1	-0.1
P50753	Troponin T, cardiac muscle OS=Rattus norvegicus GN=Tnnt2 PE=1 SV=2	30.7692	8	42	8	1	299	35.709	4.98	NA	55000000	NA	6200000	5000000	NA	0.087	314.701	4	1850000	16550000	0.666667	0.666667	0.111782	-0.111782
D4A7R0	Signal recognition particle subunit SRP72 OS=Rattus norvegicus GN=Srp72 PE=1 SV=2	23.4328	13	83	9	1	670	74.606	9.17	4500000	9500000	5100000	NA	89000000	11000000	0.759	430.853	13	6.36667e+06	50000000	1	0.666667	0.127333	-0.127333
Q6LE95	Kininogen OS=Rattus norvegicus GN=Kng1l1 PE=4 SV=1	50	4	96	2	1	56	6.01	8.98	7600000	NA	NA	62000000	88000000	23000000	14.849	769.241	4	7600000	5.76667e+07	0.333333	1	0.131792	-0.131792
D3ZXA6	Protein Pdpr OS=Rattus norvegicus GN=Pdpr PE=1 SV=1	5.01139	4	40	4	1	878	98.756	6.48	110000000	7600000	NA	5700000	6900000	3700000	0.169	75.1607	4	3200000	22700000	0.666667	0.666667	0.140969	-0.140969
P15684	Aminopeptidase N OS=Rattus norvegicus GN=Anpep PE=1 SV=2	33.7824	22	371	2	1	965	109.38	5.47	4300000	NA	NA	NA	30000000	NA	2.455	9642.24	22	4300000	30000000	0.333333	0.333333	0.143333	-0.143333
Q7TT49	Serine/threonine-protein kinase MRCK beta OS=Rattus norvegicus GN=Cdc42bpb PE=1 SV=1	3.61938	5	43	5	1	1713	194.765	6.46	4300000	1600000	4500000	5800000	52000000	11000000	0.088	248.842	5	3.46667e+06	2.29333e+07	1	1	0.151163	-0.151163
B6ID08	Metallothionein OS=Rattus norvegicus GN=Mt2A PE=2 SV=1	65.5738	3	43	3	1	61	6.14	7.83	6700000	16000000	15000000	76000000	130000000	38000000	5.813	1985.62	3	1.25667e+07	8.13333e+07	1	1	0.154508	-0.154508
A0A0H2UI19	Coagulation factor XII OS=Rattus norvegicus GN=F12 PE=1 SV=1	18.0763	10	37	10	1	603	66.674	7.3	10000000	7400000	18000000	5700000	NA	NA	0.091	41.239	4	950000	5500000	0.666667	0.333333	0.172727	-0.172727
B5DEM3	Tmed4 protein OS=Rattus norvegicus GN=Tmed4 PE=2 SV=1	19.3833	5	71	3	1	227	26.128	8.59	5500000	7200000	10000000	71000000	NA	12000000	1.154	1399.64	5	7.56667e+06	41500000	1	0.666667	0.182329	-0.182329
Q5U367	Procollagen-lysine,2-oxoglutarate 5-dioxygenase 3 OS=Rattus norvegicus GN=Plod3 PE=2 SV=1	10.6613	6	30	5	1	741	85.007	6.24	NA	690000	NA	3300000	NA	4200000	0.318	269.337	6	690000	3750000	0.333333	0.666667	0.184	-0.184
D4A465	Protein Lamtor2 OS=Rattus norvegicus GN=Lamtor2 PE=1 SV=1	29.6	3	14	3	1	125	13.472	5.4	5000000	NA	4200000	NA	25000000	NA	1.154	126.628	3	4600000	25000000	0.666667	0.333333	0.184	-0.184
P08932	T-kininogen 2 OS=Rattus norvegicus PE=1 SV=2	65.814	23	798	8	1	430	47.673	6.35	22000000	13000000	46000000	180000000	200000000	50000000	28.427	16310.3	23	27000000	1.43333e+08	1	1	0.188372	-0.188372
Q68FR2	Bridging integrator 2 OS=Rattus norvegicus GN=Bin2 PE=1 SV=1	8.6785	4	30	3	1	507	55.085	4.88	NA	3400000	NA	NA	5200000	30000000	0.283	206.174	4	3400000	17600000	0.333333	0.666667	0.193182	-0.193182
Q5M891	C4b-binding protein alpha chain OS=Rattus norvegicus GN=C4bpa PE=1 SV=1	31.7804	17	78	17	1	601	67.158	7.78	2000000	NA	NA	15000000	NA	4100000	1.488	771.208	17	2000000	9550000	0.333333	0.666667	0.209424	-0.209424
F1LTX4	Protein Lrrn4 OS=Rattus norvegicus GN=Lrrn4 PE=1 SV=2	5.30612	3	8	3	1	735	80.846	6.67	NA	1100000	NA	3100000	8800000	3600000	0.252	69.1201	3	1100000	5.16667e+06	0.333333	1	0.212903	-0.212903
A0A0G2K7I4	Protein Rcsd1 OS=Rattus norvegicus GN=Rcsd1 PE=1 SV=1	10.6796	4	11	4	1	412	43.846	5	NA	NA	2000000	NA	9200000	NA	0.532	100.793	4	2000000	9200000	0.333333	0.333333	0.217391	-0.217391
O08699	15-hydroxyprostaglandin dehydrogenase [NAD(+)] OS=Rattus norvegicus GN=Hpgd PE=2 SV=2	13.9098	3	7	3	1	266	28.921	6.39	NA	NA	1800000	NA	8100000	NA	0.389	55.41	3	1800000	8100000	0.333333	0.333333	0.222222	-0.222222
Q63581	Rat T-kininogen (T-KG) OS=Rattus norvegicus PE=4 SV=1	41.8605	16	626	5	0	430	47.588	6.52	50000000	25000000	120000000	320000000	440000000	110000000	11.69	14597.9	16	65000000	290000000	1	1	0.224138	-0.224138
Q5PQU1	Kininogen 1 OS=Rattus norvegicus GN=Kng1 PE=2 SV=1	49.7674	18	716	7	1	430	47.734	6.74	50000000	26000000	120000000	320000000	440000000	110000000	25.827	15634.9	18	6.53333e+07	290000000	1	1	0.225287	-0.225287
Q4V8B7	Inactive hydroxysteroid dehydrogenase-like protein 1 OS=Rattus norvegicus GN=Hsdl1 PE=2 SV=1	7.27273	2	11	2	1	330	36.884	8.7	910000	NA	NA	3800000	NA	NA	0.233	203.982	2	910000	3800000	0.333333	0.333333	0.239474	-0.239474
P51607	N-acylglucosamine 2-epimerase OS=Rattus norvegicus GN=Renbp PE=2 SV=2	9.76744	4	16	4	1	430	49.572	5.76	NA	1200000	NA	NA	NA	5000000	0.433	52.7805	4	1200000	5000000	0.333333	0.333333	0.24	-0.24
P70617	Ninjurin-1 OS=Rattus norvegicus GN=Ninj1 PE=1 SV=1	7.89474	1	13	1	1	152	16.529	6.55	2100000	NA	2100000	NA	8600000	NA	0.931	97.5994	1	2100000	8600000	0.666667	0.333333	0.244186	-0.244186
O88496	Vitamin K-dependent gamma-carboxylase OS=Rattus norvegicus GN=Ggcx PE=1 SV=1	5.93668	3	17	3	1	758	87.423	7.91	1700000	NA	NA	5700000	5400000	9000000	0.245	447.688	3	1700000	6700000	0.333333	1	0.253731	-0.253731
Q1PS21	DNA helicase OS=Rattus norvegicus GN=Mcm7 PE=2 SV=1	19.1933	10	31	10	1	719	81.038	6.25	NA	NA	1400000	5100000	NA	5700000	0.525	253.163	10	1400000	5400000	0.333333	0.666667	0.259259	-0.259259
D3Z9J8	Sodium-coupled neutral amino acid transporter 2 OS=Rattus norvegicus GN=Sat2 PE=1 SV=1	8.82353	2	21	2	1	170	19.277	7.21	2700000	2100000	2400000	16000000	2200000	NA	0.359	339.575	2	2400000	9100000	1	0.666667	0.263736	-0.263736
Q68FY1	Nucleoporin NUP53 OS=Rattus norvegicus GN=Nup35 PE=1 SV=1	10.4615	2	10	2	1	325	34.78	9.25	NA	1400000	NA	NA	5300000	NA	0.292	116.952	2	1400000	5300000	0.333333	0.333333	0.264151	-0.264151
D3ZRN3	Protein Actbl2 OS=Rattus norvegicus GN=Actbl2 PE=1 SV=1	24.2021	10	1555	3	1	376	41.936	5.49	5600000000	5100000000	2800000000	180000000	190000000	3500000000	0.218	39.91	3	3700000	14000000	0.333333	0.333333	0.264286	-0.264286
A0A0G2K022	Protein Rcn3 OS=Rattus norvegicus GN=Rcn3 PE=1 SV=1	33.8279	9	48	9	1	337	38.919	4.86	2600000	NA	NA	6100000	4100000	18000000	1.848	1352.95	9	2600000	9400000	0.333333	1	0.276596	-0.276596
A0A0G2JZQ9	Keratin, type II cytoskeletal 1b OS=Rattus norvegicus GN=Krt77 PE=4 SV=1	5.00864	5	193	1	0	579	62.047	7.55	36000000	46000000	27000000	130000000	28000000	230000000	0.456	3193.45	5	3.63333e+07	1.29333e+08	1	1	0.280928	-0.680928
A0A0H2UHF8	Alpha-1-acid glycoprotein OS=Rattus norvegicus GN=Orm1 PE=1 SV=1	30.2128	7	294	7	1	235	26.694	6.54	2900000	39000000	68000000	200000000	98000000	92000000	5.494	5437.55	7	3.66333e+07	130000000	1	1	0.281795	-0.681795
G3V625	Chemokine-like receptor 1 OS=Rattus norvegicus GN=Cmklr1 PE=1 SV=1	8.06452	3	7	3	1	372	41.838	8.16	2700000	NA	NA	NA	9400000	NA	0.438	28.88	3	2700000	9400000	0.333333	0.333333	0.287234	-0.687234
D3ZFP4	DNA helicase OS=Rattus norvegicus GN=Mcm3 PE=1 SV=3	15.6212	10	31	10	1	813	91.602	5.48	NA	1600000	3000000	2800000	NA	13000000	0.436	273.512	10	2300000	7900000	0.666667	0.666667	0.291139	-0.691139
F1LRI5	Protein Gcn1l1 OS=Rattus norvegicus GN=Gcn1l1 PE=1 SV=3	12.7293	25	178	25	1	2671	292.886	7.3	5600000	3700000	5500000	37000000	5700000	7600000	0.321	2116.67	25	4.93333e+06	1.67667e+07	1	1	0.294235	-0.694235
Q5EBC0	Inter alpha-trypsin inhibitor, heavy chain 4 OS=Rattus norvegicus GN=Itih4 PE=1 SV=1	54.5552	39	528	39	1	933	103.691	6.2	17000000	8400000	19000000	88000000	26000000	32000000	6.804	8048.83	39	14800000	4.86667e+07	1	1	0.30411	-0.30411
G3V885	Myosin-6 OS=Rattus norvegicus GN=Myh6 PE=1 SV=2	61.4035	119	840	33	1	1938	223.243	5.73	NA	480000000	NA	70000000	25000000	NA	1.125	1556.64	18	10200000	32800000	1	0.666667	0.310976	-0.310976
Q99N97	H-caldesmon (Fragment) OS=Rattus norvegicus GN=Cald1 PE=2 SV=1	14.5374	4	24	4	1	227	26.621	4.98	8100000	11000000	NA	11000000	33000000	47000000	0.557	563.797	4	9550000	3.03333e+07	0.666667	1	0.314835	-0.314835
Q5U2V1	FK506 binding protein 10 OS=Rattus norvegicus GN=Fkbp10 PE=1 SV=1	16.8675	8	54	8	1	581	64.746	5.5	8000000	9200000	7800000	11000000	8900000	59000000	0.535	513.803	8	8.33333e+06	26300000	1	1	0.316857	-0.316857
Q95II0	MHC class Ib antigen OS=Rattus norvegicus GN=RT1-CE5 PE=2 SV=1	19.2	7	159	2	0	375	42.198	5.99	3000000	NA	4000000	NA	11000000	NA	1.043	3391.25	7	3500000	11000000	0.666667	0.333333	0.318182	-0.318182
A0A0G2JST3	Keratin, type II cytoskeletal 1 OS=Rattus norvegicus GN=Krt1 PE=1 SV=1	9.44	6	184	4	1	625	64.717	7.93	18000000	31000000	27000000	76000000	19000000	140000000	0.399	3325.99	6	2.53333e+07	7.83333e+07	1	1	0.323404	-0.323404
Q53Z83	Metallothionein OS=Rattus norvegicus GN=Mt1 PE=1 SV=1	55.7377	2	17	2	1	61	6.001	7.96	NA	NA	3100000	4100000	15000000	NA	1.154	682.41	2	3100000	9550000	0.333333	0.666667	0.324607	-0.324607
F1LSV4	Protein Sptlc2 OS=Rattus norvegicus GN=Sptlc2 PE=1 SV=3	8.75	4	13	4	1	560	62.875	8.18	NA	2300000	2000000	NA	NA	6600000	0.227	65.6038	4	2150000	6600000	0.666667	0.333333	0.325758	-0.325758
P04916	Retinol-binding protein 4 OS=Rattus norvegicus GN=Rbp4 PE=1 SV=1	32.3383	6	20	6	1	201	23.205	5.99	2300000	2700000	NA	NA	NA	7600000	3.125	316.973	6	2500000	7600000	0.666667	0.333333	0.328947	-0.328947
A0A0G2JXT3	Farnesyl pyrophosphate synthase OS=Rattus norvegicus GN=Fdps PE=1 SV=1	29.5238	11	190	11	1	420	48.628	6.57	14000000	9700000	17000000	51000000	14000000	54000000	2.047	1838.36	11	1.35667e+07	3.96667e+07	1	1	0.342017	-0.342017
Q6AYI5	Leucine-rich repeat protein SHOC-2 OS=Rattus norvegicus GN=Shoc2 PE=2 SV=1	3.78007	2	10	2	1	582	64.881	8.46	NA	2600000	NA	7600000	NA	NA	0.129	248.371	2	2600000	7600000	0.333333	0.333333	0.342105	-0.342105
Q6IG03	Keratin, type II cytoskeletal 73 OS=Rattus norvegicus GN=Krt73 PE=1 SV=1	7.05244	5	104	2	0	553	60.349	7.94	21000000	46000000	36000000	130000000	48000000	120000000	0.278	2062.22	5	3.43333e+07	9.93333e+07	1	1	0.345638	-0.745638
P13697	NADP-dependent malic enzyme OS=Rattus norvegicus GN=Me1 PE=1 SV=2	10.4895	4	25	4	1	572	63.962	6.93	5100000	6800000	3400000	23000000	NA	6500000	0.239	549.41	4	5100000	14750000	1	0.666667	0.345763	-0.745763
Q5EGY4	Synaptobrevin homolog YKT6 OS=Rattus norvegicus GN=Ykt6 PE=1 SV=1	39.899	7	41	7	1	198	22.355	6.92	3400000	NA	3500000	13000000	9300000	7500000	1.239	288.136	7	3450000	9.93333e+06	0.666667	1	0.347315	-0.747315
Q6TUG0	DnaJ homolog subfamily B member 11 OS=Rattus norvegicus GN=Dnajb11 PE=2 SV=1	17.5978	6	39	6	1	358	40.47	6.32	NA	NA	1700000	2200000	4100000	8300000	0.655	458.891	6	1700000	4.86667e+06	0.333333	1	0.349315	-0.749315
Q5XIP6	Flap endonuclease 1 OS=Rattus norvegicus GN=Fen1 PE=2 SV=1	7.36842	3	26	3	1	380	42.582	8.48	NA	NA	3600000	8500000	NA	12000000	0.241	55.4478	3	3600000	10250000	0.333333	0.666667	0.35122	-0.75122
O35397	Caspase-6 OS=Rattus norvegicus GN=Casp6 PE=2 SV=2	6.49819	2	30	2	1	277	31.536	6.93	NA	1800000	2100000	2000000	4600000	10000000	0.222	263.825	2	1950000	5.53333e+06	0.666667	1	0.35241	-0.75241
E9PSX8	Protein Sipa1 OS=Rattus norvegicus GN=Sipa1 PE=1 SV=1	5.48077	5	19	5	1	1040	112.593	6.47	NA	NA	1800000	5100000	5100000	NA	0.199	303.617	5	1800000	5100000	0.333333	0.666667	0.352941	-0.752941
P97569	Kallistatin OS=Rattus norvegicus PE=2 SV=1	26.7139	9	47	9	1	423	47.991	8.53	4700000	3800000	NA	NA	NA	12000000	1.326	500.737	9	4250000	12000000	0.666667	0.333333	0.354167	-0.354167
Q9JHY2	Sideroflexin-3 OS=Rattus norvegicus GN=Sfxn3 PE=2 SV=1	37.0717	9	162	1	1	321	35.411	9.74	5700000	NA	NA	27000000	4700000	NA	2.162	3118.81	9	5700000	15850000	0.333333	0.666667	0.359621	-0.359621
Q4G075	Leukocyte elastase inhibitor A OS=Rattus norvegicus GN=Serpinb1a PE=1 SV=1	47.4934	19	220	14	1	379	42.7	6.32	NA	8000000	360000000	17000000	26000000	9500000	0.701	336.222	3	1.96667e+07	5.46667e+07	1	1	0.359756	-0.359756
Q3ZAV8	Enhancer of mRNA-decapping protein 4 OS=Rattus norvegicus GN=Edc4 PE=1 SV=1	6.46766	7	89	7	1	1407	152.501	5.78	5500000	2700000	5600000	6200000	24000000	7500000	0.226	1437.36	7	4600000	1.25667e+07	1	1	0.366048	-0.366048
Q4G017	Nischarin OS=Rattus norvegicus GN=Nisch PE=2 SV=2	2.46338	2	15	2	1	1502	166.399	5.38	1800000	1100000	NA	4000000	3800000	3900000	0.051	110.581	2	1450000	3900000	0.666667	1	0.371795	-0.371795
Q8R491	EH domain-containing protein 3 OS=Rattus norvegicus GN=Ehd3 PE=1 SV=2	44.486	22	604	6	1	535	60.753	6.46	16000000	14000000	15000000	6900000	99000000	15000000	3.642	10534.9	22	15000000	40300000	1	1	0.372208	-0.372208
P0C0A1	Vacuolar protein-sorting-associated protein 25 OS=Rattus norvegicus GN=Vps25 PE=1 SV=1	10.2273	2	14	2	1	176	20.749	6.34	NA	7300000	NA	18000000	21000000	19000000	0.778	109.448	2	7300000	1.93333e+07	0.333333	1	0.377586	-0.377586
D3ZAI0	Protein U2surp OS=Rattus norvegicus GN=U2surp PE=1 SV=1	2.91545	3	26	3	1	1029	118.161	8.47	NA	1200000	36000000	NA	NA	48000000	0.11	361.984	3	18600000	48000000	0.666667	0.333333	0.3875	-0.3875
D3ZZR9	Peptidyl-prolyl cis-trans isomerase OS=Rattus norvegicus GN=Fkbp2 PE=1 SV=1	63.5714	7	83	7	1	140	15.378	8.88	12000000	18000000	11000000	35000000	28000000	42000000	6.743	1359.33	7	1.36667e+07	35000000	1	1	0.390476	-0.390476
P06866	Haptoglobin OS=Rattus norvegicus GN=Hp PE=1 SV=3	52.1614	20	588	20	1	347	38.539	6.54	92000000	66000000	190000000	580000000	110000000	200000000	9.857	9420.12	20	116000000	2.96667e+08	1	1	0.391011	-0.391011
P08494	Matrix Gla protein OS=Rattus norvegicus GN=Mgp PE=1 SV=2	23.301	2	15	2	1	103	12.029	9.14	NA	7100000	NA	NA	21000000	15000000	0.778	176.708	2	7100000	18000000	0.333333	0.666667	0.394444	-0.394444
A0A0G2K6X6	Serine/threonine-protein kinase MARK2 OS=Rattus norvegicus GN=Mark2 PE=1 SV=1	6.83995	4	25	4	1	731	81.969	9.69	5600000	4700000	4200000	NA	18000000	6300000	0.172	40.839	4	4.83333e+06	12150000	1	0.666667	0.397805	-0.397805
B2RYG2	Pck2 protein (Fragment) OS=Rattus norvegicus GN=Pck2 PE=2 SV=1	20.6637	11	101	11	1	663	73.225	8	13000000	5100000	12000000	53000000	6600000	16000000	0.719	1272.12	11	1.00333e+07	25200000	1	1	0.398148	-0.398148
Q6IG02	Keratin, type II cytoskeletal 2 epidermal OS=Rattus norvegicus GN=Krt2 PE=3 SV=1	6.27737	6	83	2	1	685	69.085	7.69	11000000	30000000	9000000	67000000	12000000	46000000	0.348	1854.03	6	1.66667e+07	4.16667e+07	1	1	0.4	-0.4
Q6AXT8	Splicing factor 3A subunit 2 OS=Rattus norvegicus GN=Sf3a2 PE=2 SV=1	10.1911	4	27	4	1	471	49.859	9.64	NA	NA	18000000	45000000	NA	NA	0.585	149.774	4	18000000	45000000	0.333333	0.333333	0.4	-0.4
P41565	Isocitrate dehydrogenase [NAD] subunit gamma 1, mitochondrial OS=Rattus norvegicus GN=Idh3g PE=1 SV=2	14.2494	6	62	6	1	393	42.824	8.9	11000000	6400000	6700000	24000000	23000000	13000000	0.711	1090.04	6	8.03333e+06	20000000	1	1	0.401667	-0.401667
D3ZQI1	Glutathione peroxidase OS=Rattus norvegicus GN=Gpx7 PE=1 SV=1	38.7097	5	48	5	1	186	21.076	7.85	7100000	8200000	7200000	19000000	11000000	26000000	1.929	683.441	5	7500000	1.86667e+07	1	1	0.401786	-0.401786
B0BNN3	Carbonic anhydrase 1 OS=Rattus norvegicus GN=Ca1 PE=1 SV=1	60.9195	11	104	11	1	261	28.282	7.42	2800000	6300000	NA	20000000	NA	2600000	6.499	1549.5	11	4550000	11300000	0.666667	0.666667	0.402655	-0.402655
A0A0G2KB11	Protein Stard10 OS=Rattus norvegicus GN=Stard10 PE=1 SV=1	9.09091	3	11	3	1	363	40.157	9.04	NA	NA	7600000	NA	5700000	32000000	0.28	130.39	3	7600000	18850000	0.333333	0.666667	0.403183	-0.803183
G3V8L7	Integrin alpha M OS=Rattus norvegicus GN=Itgam PE=1 SV=1	32.841	29	167	29	1	1151	127.112	6.76	NA	3300000	3600000	9000000	14000000	2600000	1.705	3639.05	29	3450000	8.53333e+06	0.666667	1	0.404297	-0.804297
Q5M9H2	Acyl-Coenzyme A dehydrogenase, very long chain OS=Rattus norvegicus GN=Acadvl PE=1 SV=1	45.1908	23	245	23	1	655	70.777	8.81	28000000	24000000	25000000	28000000	130000000	32000000	2.094	2317.22	23	2.56667e+07	6.33333e+07	1	1	0.405263	-0.805263
F1LPK5	Acidic mammalian chitinase OS=Rattus norvegicus GN=Chia PE=3 SV=3	44.3836	11	210	11	1	365	39.85	4.77	34000000	32000000	30000000	50000000	120000000	66000000	5.158	2592.83	11	32000000	7.86667e+07	1	1	0.40678	-0.80678
M0R919	Prefoldin subunit 3 OS=Rattus norvegicus GN=Vbp1 PE=1 SV=2	17.2043	3	37	3	1	186	20.916	5.73	NA	3100000	NA	12000000	5700000	5100000	0.54	967.403	3	3100000	7600000	0.333333	1	0.407895	-0.807895
P06536	Glucocorticoid receptor OS=Rattus norvegicus GN=Nr3c1 PE=1 SV=2	3.39623	3	13	3	1	795	87.501	6.77	NA	5600000	1800000	9700000	NA	8400000	0.136	88.7024	3	3700000	9050000	0.666667	0.666667	0.40884	-0.80884
Q6MG73	Complement component 2 OS=Rattus norvegicus GN=C2 PE=1 SV=1	14.9077	9	54	9	1	758	83.646	7.36	7500000	3900000	6200000	3800000	5000000	34000000	0.498	466.661	9	5.86667e+06	1.42667e+07	1	1	0.411215	-0.811215
F1M155	Protein Svil OS=Rattus norvegicus GN=Svil PE=1 SV=3	2.40185	5	15	5	1	2165	241.903	6.98	4600000	2400000	NA	NA	8500000	NA	0.067	198.747	5	3500000	8500000	0.666667	0.333333	0.411765	-0.411765
Q04462	Valine--tRNA ligase OS=Rattus norvegicus GN=Vars PE=2 SV=2	21.2025	23	165	23	1	1264	140.28	7.61	16000000	5000000	9900000	26000000	28000000	21000000	0.823	1355.85	23	10300000	25000000	1	1	0.412	-0.412
D3ZY47	Protein RGD1559896 OS=Rattus norvegicus GN=RGD1559896 PE=1 SV=1	5.24691	2	7	2	1	324	35.647	5.07	5400000	NA	NA	6200000	20000000	NA	0.212	29.63	2	5400000	13100000	0.333333	0.666667	0.412214	-0.412214
G3V8H7	Olfactomedin-like 3 (Predicted) OS=Rattus norvegicus GN=Olfml3 PE=1 SV=1	22.2488	8	24	8	1	418	47.19	6.87	NA	6800000	1200000	9700000	NA	NA	0.812	234.264	8	4000000	9700000	0.666667	0.333333	0.412371	-0.412371
Q5FVH2	Phospholipase D3 OS=Rattus norvegicus GN=Pld3 PE=2 SV=1	11.2705	4	44	4	1	488	54.364	6.52	1700000	2300000	2600000	6000000	6800000	3200000	0.389	972.039	4	2200000	5.33333e+06	1	1	0.4125	-0.4125
G3V7Q4	Protein Ptpn12 OS=Rattus norvegicus GN=Ptpn12 PE=1 SV=1	15.5352	10	64	10	1	766	85.93	5.83	4000000	1400000	4400000	9900000	7300000	6500000	0.559	490.632	10	3.26667e+06	7900000	1	1	0.413502	-0.413502
A0A096MIV5	Protein Abcf2 OS=Rattus norvegicus GN=Abcf2 PE=1 SV=1	2.23285	1	14	1	1	627	71.61	7.14	NA	NA	1800000	4300000	NA	4400000	0.043	77.5473	1	1800000	4350000	0.333333	0.666667	0.413793	-0.413793
A0A0G2K509	Keratin, type II cytoskeletal 5 OS=Rattus norvegicus GN=Krt5 PE=1 SV=1	24.5347	14	183	8	0	591	62.753	6.83	23000000	46000000	27000000	92000000	28000000	110000000	1.228	3663.76	14	32000000	7.66667e+07	1	1	0.417391	-0.417391
P18445	60S ribosomal protein L27a OS=Rattus norvegicus GN=Rpl27a PE=1 SV=3	34.4595	5	58	5	1	148	16.608	11.12	8300000	6400000	7500000	23000000	14000000	16000000	0.896	970.277	5	7400000	1.76667e+07	1	1	0.418868	-0.418868
Q6P7C7	Transmembrane glycoprotein NMB OS=Rattus norvegicus GN=Gpnmb PE=2 SV=1	1.22378	1	35	1	1	572	63.691	7.11	21000000	11000000	25000000	57000000	50000000	29000000	0.08	102.997	1	19000000	4.53333e+07	1	1	0.419118	-0.419118
D3ZAX5	Calcium homeostasis endoplasmic reticulum protein (Predicted) OS=Rattus norvegicus GN=Cherp PE=1 SV=2	2.78075	2	10	2	1	935	105.854	9.14	2500000	NA	NA	5900000	NA	NA	0.093	23.92	2	2500000	5900000	0.333333	0.333333	0.423729	-0.423729
D4A510	Protein Smarcc2 OS=Rattus norvegicus GN=Smarcc2 PE=1 SV=3	14.185	14	141	7	1	1135	124.661	5.44	34000000	5800000	3900000	26000000	48000000	28000000	0.614	1703.67	14	1.45667e+07	34000000	1	1	0.428431	-0.428431
G3V8F8	Nestin OS=Rattus norvegicus GN=Nes PE=1 SV=1	5.17697	8	33	8	1	1893	208.788	4.32	4500000	NA	3400000	4400000	NA	14000000	0.162	325.086	8	3950000	9200000	0.666667	0.666667	0.429348	-0.429348
A0A0A0MY14	Protein LOC100359503 OS=Rattus norvegicus GN=LOC100359503 PE=4 SV=1	28.9855	2	19	2	1	69	7.857	10.21	6500000	NA	24000000	33000000	39000000	34000000	0.931	499.531	2	15250000	3.53333e+07	0.666667	1	0.431604	-0.431604
Q6AYQ9	Peptidyl-prolyl cis-trans isomerase OS=Rattus norvegicus GN=Ppic PE=1 SV=1	8.49057	2	38	2	1	212	22.995	8.13	4400000	4800000	4900000	9700000	8900000	14000000	0.311	534.119	2	4700000	1.08667e+07	1	1	0.432515	-0.432515
A0A0H2UHN2	Isopentenyl-diphosphate Delta-isomerase 1 OS=Rattus norvegicus GN=Idi1 PE=1 SV=1	27.5618	6	26	6	1	283	32.482	6.62	NA	2900000	NA	4100000	NA	9300000	0.905	189.559	6	2900000	6700000	0.333333	0.666667	0.432836	-0.432836
Q6PCU4	Emd protein OS=Rattus norvegicus GN=Emd PE=1 SV=1	45.3846	9	94	9	1	260	29.567	5.19	8100000	8600000	13000000	13000000	13000000	42000000	2.875	1032.44	9	9900000	2.26667e+07	1	1	0.436765	-0.436765
P62832	60S ribosomal protein L23 OS=Rattus norvegicus GN=Rpl23 PE=2 SV=1	37.8571	4	74	4	1	140	14.856	10.51	9400000	6800000	14000000	34000000	15000000	20000000	1.848	1070.3	4	1.00667e+07	23000000	1	1	0.437681	-0.437681
D3ZSY4	Eosinophil peroxidase (Predicted) OS=Rattus norvegicus GN=Epx PE=1 SV=1	27.5524	18	109	15	1	715	81.23	10.14	NA	6200000	1900000	NA	NA	9200000	1.025	987.347	18	4050000	9200000	0.666667	0.333333	0.440217	-0.440217
Q9R0T3	DnaJ homolog subfamily C member 3 OS=Rattus norvegicus GN=Dnajc3 PE=1 SV=3	11.3095	4	19	4	1	504	57.525	5.77	NA	3500000	NA	NA	9000000	6900000	0.245	88.1777	4	3500000	7950000	0.333333	0.666667	0.440252	-0.440252
Q5XI81	Fragile X mental retardation syndrome-related protein 1 OS=Rattus norvegicus GN=Fxr1 PE=1 SV=1	6.8662	4	40	3	1	568	63.908	6.39	1800000	NA	4800000	NA	NA	7400000	0.227	573.402	4	3300000	7400000	0.666667	0.333333	0.445946	-0.445946
F1M8F5	Protein LOC100909605 OS=Rattus norvegicus GN=LOC100909605 PE=3 SV=3	11.9512	5	55	4	0	410	46.328	7.8	NA	8300000	12000000	34000000	11000000	NA	0.719	1114.28	5	10150000	22500000	0.666667	0.666667	0.451111	-0.451111
A0A0G2JUJ9	Protein Sec63 OS=Rattus norvegicus GN=Sec63 PE=1 SV=1	5.26316	4	24	4	1	760	87.661	5.41	2800000	NA	NA	5400000	6400000	6800000	0.248	310.219	4	2800000	6200000	0.333333	1	0.451613	-0.451613
A0A0H2UHS7	60S ribosomal protein L18 OS=Rattus norvegicus GN=Rpl18 PE=1 SV=1	22.7513	4	29	4	1	189	21.773	11.78	NA	NA	19000000	43000000	27000000	56000000	0.719	233.221	4	19000000	42000000	0.333333	1	0.452381	-0.452381
A0A0G2K402	Protein Myef2 OS=Rattus norvegicus GN=Myef2 PE=1 SV=1	7.78342	4	24	4	1	591	63.335	8.94	2900000	NA	4900000	8400000	7400000	10000000	0.243	154.312	4	3900000	8600000	0.666667	1	0.453488	-0.453488
P84586	RNA-binding motif protein, X chromosome retrogene-like OS=Rattus norvegicus GN=Rbmxrtl PE=1 SV=1	29.1237	13	189	5	1	388	42.178	9.99	9500000	14000000	9900000	NA	18000000	31000000	1.119	2206.12	13	1.11333e+07	24500000	1	0.666667	0.454422	-0.454422
Q8CHN6	Sphingosine-1-phosphate lyase 1 OS=Rattus norvegicus GN=Sgpl1 PE=2 SV=1	13.0282	6	54	6	1	568	63.717	9.17	3200000	3600000	45000000	4600000	47000000	62000000	0.528	757.486	6	1.72667e+07	3.78667e+07	1	1	0.455986	-0.455986
P21913	Succinate dehydrogenase [ubiquinone] iron-sulfur subunit, mitochondrial OS=Rattus norvegicus GN=Sdhb PE=2 SV=2	38.2979	9	162	9	1	282	31.809	8.68	22000000	24000000	21000000	24000000	49000000	73000000	1.555	3121.67	9	2.23333e+07	4.86667e+07	1	1	0.458904	-0.458904
A0A0G2JUX5	Transcriptional activator protein Pur-beta OS=Rattus norvegicus GN=Purb PE=1 SV=1	43.5331	9	139	1	1	317	33.512	5.43	20000000	15000000	19000000	39000000	NA	NA	1.424	3497.73	9	18000000	39000000	1	0.333333	0.461538	-0.461538
A0A0G2QC17	Protein phosphatase 2C, magnesium dependent, catalytic subunit, isoform CRA_a OS=Rattus norvegicus GN=Pdp1 PE=1 SV=1	4.26288	2	13	2	1	563	63.795	6.81	NA	NA	1400000	4400000	3200000	1500000	0.113	128.209	2	1400000	3.03333e+06	0.333333	1	0.461538	-0.461538
P85845	Fascin OS=Rattus norvegicus GN=Fscn1 PE=1 SV=2	41.5822	18	241	7	1	493	54.457	6.74	2300000	12000000	3000000	9000000	8900000	19000000	2.44	5557.64	18	5.76667e+06	12300000	1	1	0.468835	-0.468835
Q6P689	Protein wntless homolog OS=Rattus norvegicus GN=Wls PE=1 SV=1	3.69686	2	8	2	1	541	62.161	7.5	NA	1600000	NA	3400000	NA	NA	0.16	19.02	2	1600000	3400000	0.333333	0.333333	0.470588	-0.470588
P28042	Single-stranded DNA-binding protein, mitochondrial OS=Rattus norvegicus GN=Ssbp1 PE=1 SV=2	27.8146	3	20	3	1	151	17.444	9.83	5000000	NA	NA	12000000	NA	9200000	0.719	263.073	3	5000000	10600000	0.333333	0.666667	0.471698	-0.471698
D4A7L6	Protein Rpia OS=Rattus norvegicus GN=Rpia PE=1 SV=1	29.703	7	56	7	1	303	32.452	8.02	1500000	2200000	3400000	6800000	5200000	3000000	1.371	499.249	7	2.36667e+06	5000000	1	1	0.473333	-0.473333
Q6P503	ATPase, H+ transporting, V1 subunit D, isoform CRA_c OS=Rattus norvegicus GN=Atp6v1d PE=1 SV=1	10.9312	2	10	2	1	247	28.291	9.45	NA	1400000	NA	NA	3100000	2800000	0.212	196.679	2	1400000	2950000	0.333333	0.666667	0.474576	-0.474576
A0A0G2JSM0	DnaJ (Hsp40) homolog, subfamily C, member 2 OS=Rattus norvegicus GN=Dnajc2 PE=1 SV=1	1.28824	1	8	1	1	621	71.824	8.85	NA	2000000	NA	NA	NA	4200000	0.038	36.3213	1	2000000	4200000	0.333333	0.333333	0.47619	-0.47619
O55006	Protein RoBo-1 OS=Rattus norvegicus PE=1 SV=1	19.5833	4	91	4	1	240	26.17	7.33	4300000	12000000	28000000	35000000	37000000	21000000	1.276	3018.99	4	1.47667e+07	31000000	1	1	0.476344	-0.476344
A0A0G2K9B1	Protein LOC299282 OS=Rattus norvegicus GN=LOC299282 PE=1 SV=1	43.75	19	408	19	1	432	48.342	5.57	12000000	18000000	80000000	110000000	55000000	65000000	7.733	8421.22	19	3.66667e+07	7.66667e+07	1	1	0.478261	-0.478261
Q6PCT8	Succinate dehydrogenase [ubiquinone] cytochrome b small subunit, mitochondrial OS=Rattus norvegicus GN=Sdhd PE=2 SV=1	10.6918	2	31	2	1	159	16.965	9.29	5200000	6300000	12000000	17000000	17000000	15000000	0.778	358.571	2	7.83333e+06	1.63333e+07	1	1	0.479592	-0.479592
Q4KM38	FUS interacting protein (Serine-arginine rich) 1 OS=Rattus norvegicus GN=Srsf10 PE=1 SV=1	34.1463	5	22	5	1	164	19.959	10.51	5900000	6700000	NA	NA	14000000	12000000	0.968	222.784	5	6300000	13000000	0.666667	0.666667	0.484615	-0.484615
Q66H94	Peptidyl-prolyl cis-trans isomerase FKBP9 OS=Rattus norvegicus GN=Fkbp9 PE=2 SV=1	10.7018	7	45	7	1	570	63.086	5.1	NA	5000000	5500000	11000000	6000000	15000000	0.655	311.962	7	5250000	1.06667e+07	0.666667	1	0.492188	-0.492188
P62845	40S ribosomal protein S15 OS=Rattus norvegicus GN=Rps15 PE=1 SV=2	8.27586	1	23	1	1	145	17.029	10.39	NA	NA	11000000	26000000	16000000	25000000	0.259	122.99	1	11000000	2.23333e+07	0.333333	1	0.492537	-0.492537
Q498D9	PDZ domain-containing protein GIPC2 OS=Rattus norvegicus GN=Gipc2 PE=2 SV=1	14.3312	3	24	2	1	314	34.181	7.03	3500000	1500000	NA	6500000	3300000	5400000	0.334	196.492	3	2500000	5.06667e+06	0.666667	1	0.493421	-0.493421
A0A0G2K756	Acyl-Coenzyme A binding domain containing 3 OS=Rattus norvegicus GN=Acbd3 PE=1 SV=1	31.9392	11	63	11	1	526	60.283	5.01	4700000	4900000	2500000	13000000	6100000	5400000	1.371	938.125	11	4.03333e+06	8.16667e+06	1	1	0.493878	-0.493878
F7F389	Complement component C9 OS=Rattus norvegicus GN=C9 PE=1 SV=1	34.3103	21	275	21	1	580	65.243	6.1	19000000	13000000	22000000	66000000	20000000	23000000	2.415	4974.11	21	18000000	3.63333e+07	1	1	0.495413	-0.495413
B1H282	Glycosyltransferase 25 domain containing 1 OS=Rattus norvegicus GN=Colgalt1 PE=1 SV=1	11.9935	8	44	8	1	617	71.069	7.12	8000000	NA	3800000	11000000	9700000	15000000	0.48	738.529	8	5900000	11900000	0.666667	1	0.495798	-0.495798
Q5RJR2	Twinfilin-1 OS=Rattus norvegicus GN=Twf1 PE=1 SV=1	38	11	165	9	1	350	40.065	6.67	16000000	16000000	46000000	50000000	47000000	60000000	1.913	2551.43	11	26000000	5.23333e+07	1	1	0.496815	-0.496815
Q91V33	KH domain-containing, RNA-binding, signal transduction-associated protein 1 OS=Rattus norvegicus GN=Khdrbs1 PE=1 SV=1	15.5756	6	80	6	1	443	48.285	8.72	4500000	8500000	17000000	20000000	16000000	24000000	0.751	550.179	6	10000000	20000000	1	1	0.5	-0.993421
P20411	High affinity immunoglobulin epsilon receptor subunit gamma OS=Rattus norvegicus GN=Fcer1g PE=1 SV=1	25.5814	3	22	3	1	86	9.758	6	27000000	21000000	NA	NA	48000000	NA	2.981	182.978	3	24000000	48000000	0.666667	0.333333	0.5	-0.993878
G3V6R5	Sulfite oxidase OS=Rattus norvegicus GN=Suox PE=1 SV=1	10.0733	4	20	4	1	546	60.768	6.8	3600000	2900000	NA	9200000	6100000	4200000	0.324	100.654	4	3250000	6500000	0.666667	1	0.5	-0.995413
F2Z3T0	Parafibromin OS=Rattus norvegicus GN=Cdc73 PE=1 SV=1	3.76648	2	10	2	1	531	60.539	9.61	1600000	NA	1600000	NA	3200000	NA	0.091	53.5883	2	1600000	3200000	0.666667	0.333333	0.5	-0.995798
Q63166	Dynein-like protein 3 (Fragment) OS=Rattus norvegicus GN=Dnah3 PE=2 SV=1	12.7119	1	14	1	1	118	12.772	8.34	14000000	13000000	15000000	NA	28000000	NA	0.259	0	1	14000000	28000000	1	0.333333	0.5	-0.996815

## Sheet: ALI-D5 vs Sham-D5
Accession	Description	Coverage	# Peptides	# PSMs	# Unique Peptides	# Protein Groups	# AAs	MW [kDa]	calc. pI	10p	12p	41p	7p	9p	44p	emPAI	Score Mascot	# Peptides Mascot	Group_ALI_D5.average	Group_Sham_D5.average	Group_ALI_D5.call.percent	Group_Sham_D5.call.percent	Group_ALI_D5.vs.Group_Sham_D5.FC
P70541	Translation initiation factor eIF-2B subunit gamma OS=Rattus norvegicus GN=Eif2b3 PE=2 SV=2	7.30088	3	11	3	1	452	50.403	6.96	NA	NA	260000000	2300000	6700000	4400000	0.205	180.489	3	260000000	4.46667e+06	0.333333	1	14.209	0.993633
F1LYX9	Protein Dsg2 OS=Rattus norvegicus GN=Dsg2 PE=1 SV=2	2.21631	2	10	2	1	1128	122.214	5.24	33000000	NA	NA	NA	NA	2400000	0.064	0	2	33000000	2400000	0.333333	0.333333	13.75	0.961538
Q6MG28	RCG41814 OS=Rattus norvegicus GN=RT1-CE16 PE=3 SV=1	12.4324	4	77	2	0	370	41.189	5.95	5900000	NA	NA	NA	NA	430000	0.61	1206.95	4	5900000	430000	0.333333	0.333333	13.7209	0.959506
Q95459	Mature MHC class I alpha heavy chain (Fragment) OS=Rattus norvegicus GN=RT1.Cg PE=2 SV=2	13.2948	4	78	2	0	346	38.885	5.91	5900000	NA	NA	NA	NA	430000	0.638	1190.95	4	5900000	430000	0.333333	0.333333	13.7209	0.959506
Q6MG66	LSM2 homolog, U6 small nuclear RNA associated [S. cerevisiae] OS=Rattus norvegicus GN=Lsm2 PE=1 SV=1	29.0076	2	2	2	1	131	14.77	7.99	NA	NA	38000000	NA	NA	3000000	0.334	37.94	2	38000000	3000000	0.333333	0.333333	12.6667	0.885781
Q642B4	C-type lectin domain family 14, member a OS=Rattus norvegicus GN=Clec14a PE=1 SV=1	26.0684	9	74	9	1	468	50.147	7.12	14000000	17000000	210000000	6900000	NA	NA	1.212	1362.8	9	8.03333e+07	6900000	1	0.333333	11.6425	0.814162
F1M614	Protein Lama2 OS=Rattus norvegicus GN=Lama2 PE=1 SV=3	4.80615	12	58	12	1	3121	343.637	6.19	2800000	7300000	62000000	NA	2200000	NA	0.134	630.878	12	2.40333e+07	2200000	1	0.333333	10.9242	0.763933
D3ZSY4	Eosinophil peroxidase (Predicted) OS=Rattus norvegicus GN=Epx PE=1 SV=1	27.5524	18	109	15	1	715	81.23	10.14	NA	NA	23000000	NA	NA	2400000	1.025	987.347	18	23000000	2400000	0.333333	0.333333	9.58333	0.670163
D3ZRN3	Connective tissue growth factor OS=Rattus norvegicus PE=1 SV=1	24.2021	10	1555	3	1	376	41.936	5.49	140000000	4400000000	130000000	130000000	170000000	150000000	2.162	623.346	7	30000000	3400000	0.333333	0.333333	8.82353	0.61703
Q9JHY2	Sideroflexin-3 OS=Rattus norvegicus GN=Sfxn3 PE=2 SV=1	37.0717	9	162	1	1	321	35.411	9.74	NA	27000000	31000000	NA	NA	3400000	2.162	3118.81	9	29000000	3400000	0.666667	0.333333	8.52941	0.596462
G3V8D6	Tripartite motif protein 3, isoform CRA_a OS=Rattus norvegicus GN=Trim3 PE=1 SV=1	11.5591	6	31	6	1	744	80.71	7.81	76000000	170000000	13000000	NA	12000000	9800000	0.342	429.05	6	8.63333e+07	10900000	1	0.666667	7.92049	0.55388
B0BNL2	Peptidylprolyl isomerase OS=Rattus norvegicus GN=Pin1 PE=1 SV=1	21.2121	3	14	3	1	165	18.321	8.82	NA	NA	35000000	4800000	NA	NA	0.701	104.996	3	35000000	4800000	0.333333	0.333333	7.29167	0.509907
B4F7A0	Tnxb protein OS=Rattus norvegicus GN=Tnxb PE=2 SV=1	6.35193	5	36	5	1	1165	126.651	5.6	99000000	6100000	6600000	4100000	6400000	6600000	0.212	788.225	5	3.72333e+07	5700000	1	1	6.53216	0.456795
F1LU71	AU RNA binding protein/enoyl-coenzyme A hydratase (Predicted), isoform CRA_a OS=Rattus norvegicus GN=Auh PE=1 SV=2	16.1905	4	22	4	1	315	33.32	9.42	9400000	11000000	9600000	1600000	NA	NA	0.374	37.2168	4	10000000	1600000	1	0.333333	6.25	0.437063
A0A0G2K401	Propionyl-CoA carboxylase alpha chain, mitochondrial OS=Rattus norvegicus GN=Pcca PE=1 SV=1	18.6722	12	76	12	1	723	79.761	7.21	8800000	12000000	170000000	9300000	13000000	9100000	0.633	320.623	12	63600000	1.04667e+07	1	1	6.07643	0.424925
P63074	Eukaryotic translation initiation factor 4E OS=Rattus norvegicus GN=Eif4e PE=1 SV=1	21.659	5	48	5	1	217	25.037	6.15	NA	340000000	NA	90000000	18000000	75000000	1.371	560.616	5	340000000	61000000	0.333333	1	5.57377	0.389774
F1M6W2	Endoplasmic reticulum metallopeptidase 1 OS=Rattus norvegicus GN=Ermp1 PE=1 SV=1	12.6949	9	78	9	1	898	99.916	7.49	7100000	39000000	47000000	6600000	5900000	4400000	0.569	1176.68	9	3.10333e+07	5.63333e+06	1	1	5.50888	0.385236
Q5XIS9	Serine/threonine-protein kinase D2 OS=Rattus norvegicus GN=Prkd2 PE=1 SV=1	5.02857	4	21	4	1	875	96.436	6.86	21000000	NA	NA	NA	3500000	4200000	0.175	97.4052	4	21000000	3850000	0.333333	0.666667	5.45455	0.381437
D3ZBB3	Protein Tmem47 OS=Rattus norvegicus GN=Tmem47 PE=1 SV=1	14.9171	3	17	3	1	181	19.955	6.73	11000000	44000000	8900000	4100000	NA	NA	1.683	247.067	3	21300000	4100000	1	0.333333	5.19512	0.363295
A0A0G2K1G5	Transforming growth factor beta binding protein 2, isoform CRA_a OS=Rattus norvegicus GN=Ltbp2 PE=1 SV=1	7.80994	11	28	11	1	1831	196.993	5.29	NA	25000000	NA	9100000	1300000	6400000	3.642	10534.9	22	38500000	8.03333e+06	1	1	4.79253	0.335142
Q8CHN6	Sphingosine-1-phosphate lyase 1 OS=Rattus norvegicus GN=Sgpl1 PE=2 SV=1	13.0282	6	54	6	1	568	63.717	9.17	120000000	4400000	8000000	7600000	8500000	12000000	0.528	757.486	6	4.41333e+07	9.36667e+06	1	1	4.71174	0.329493
A0A0G2JSI0	Dimethylaniline monooxygenase [N-oxide-forming] OS=Rattus norvegicus GN=Fmo3 PE=1 SV=1	27.6836	14	123	14	1	531	59.937	8.05	23000000	18000000	22000000	2500000	8800000	2600000	1.543	1995.49	14	21000000	4.63333e+06	1	1	4.53237	0.316949
G3V765	Envoplakin (Predicted) OS=Rattus norvegicus GN=Evpl PE=1 SV=1	16.5599	29	183	29	1	2029	230.971	6.58	24000000	36000000	33000000	5000000	10000000	5700000	0.428	1668.79	29	31000000	6900000	1	1	4.49275	0.314179
D3ZXP3	Histone H2A OS=Rattus norvegicus GN=H2afx PE=1 SV=1	37.7622	5	489	1	1	143	15.105	10.74	46000000	NA	3800000	5600000	51000	11000000	2.162	8766.43	5	24900000	5.55033e+06	0.666667	1	4.48622	0.313721
D3ZCV0	Protein Actn2 OS=Rattus norvegicus GN=Actn2 PE=1 SV=1	43.2886	33	619	20	1	894	103.768	5.45	NA	58000000	NA	4600000	NA	NA	1.276	2342.06	8	34000000	7.66667e+06	0.666667	1	4.43478	0.310125
Q4QQV8	Charged multivesicular body protein 5 OS=Rattus norvegicus GN=Chmp5 PE=2 SV=1	20.0913	3	31	3	1	219	24.56	4.79	NA	80000000	11000000	12000000	9000000	9900000	0.638	339.206	3	45500000	10300000	0.666667	1	4.41748	0.308914
G3V7M3	Protein Krt23 OS=Rattus norvegicus GN=Krt23 PE=3 SV=1	3.79147	2	5	2	0	422	48.053	6.05	71000000	NA	NA	NA	NA	17000000	0.125	75.234	2	71000000	17000000	0.333333	0.333333	4.17647	0.292061
D3ZAI0	Protein U2surp OS=Rattus norvegicus GN=U2surp PE=1 SV=1	2.91545	3	26	3	1	1029	118.161	8.47	16000000	20000000	18000000	5200000	3400000	4400000	0.11	361.984	3	18000000	4.33333e+06	1	1	4.15385	0.290479
Q64716	Insulin receptor-related protein OS=Rattus norvegicus GN=Insrr PE=1 SV=3	0.538462	1	6	1	1	1300	144.753	6.6	130000000	NA	NA	NA	NA	32000000	0.025	133.282	1	130000000	32000000	0.333333	0.333333	4.0625	0.284091
Q5PQN0	Neurocalcin-delta OS=Rattus norvegicus GN=Ncald PE=1 SV=3	29.0155	7	115	2	1	193	22.231	5.35	6700000	33000000	7500000	4100000	4000000	4100000	2.875	1170.93	7	1.57333e+07	4.06667e+06	1	1	3.86885	0.270549
Q5EBD0	SEC14-like 2 (S. cerevisiae) OS=Rattus norvegicus GN=Sec14l2 PE=1 SV=1	24.3176	8	249	3	1	403	46.176	7.4	3700000	21000000	NA	NA	NA	3200000	1.31	5628.67	8	12350000	3200000	0.666667	0.333333	3.85938	0.269886
Q76LU9	Glutathione peroxidase OS=Rattus norvegicus GN=Gpx4 PE=2 SV=2	17.3913	4	24	4	1	253	29.244	10.29	14000000	16000000	18000000	NA	NA	4200000	0.445	327.68	4	16000000	4200000	1	0.333333	3.80952	0.2664
Q5XIF3	NADH dehydrogenase [ubiquinone] iron-sulfur protein 4, mitochondrial OS=Rattus norvegicus GN=Ndufs4 PE=1 SV=1	14.2857	2	15	2	1	175	19.728	10.14	NA	NA	13000000	3700000	NA	3300000	0.501	17.7	2	13000000	3500000	0.333333	0.666667	3.71429	0.25974
G3V615	Complement factor B, isoform CRA_b OS=Rattus norvegicus GN=Cfb PE=1 SV=1	49.1481	31	538	31	1	763	85.299	6.96	46000000	51000000	420000000	80000000	79000000	47000000	0.036	30.11	1	9200000	2500000	0.333333	1	3.68	0.257343
A0A0G2K9Q9	Keratin, type I cytoskeletal 17 OS=Rattus norvegicus GN=Krt17 PE=1 SV=1	24.3848	16	352	4	1	447	49.544	5.11	54000000	NA	NA	NA	NA	15000000	2.162	5446.91	16	54000000	15000000	0.333333	0.333333	3.6	0.251748
Q5XIH1	Asporin OS=Rattus norvegicus GN=Aspn PE=1 SV=1	18.9333	5	50	5	1	375	42.74	8.29	11000000	16000000	14000000	NA	2900000	4700000	0.585	314.968	5	1.36667e+07	3800000	1	0.666667	3.59649	0.251503
Q6IFV1	Keratin, type I cytoskeletal 14 OS=Rattus norvegicus GN=Krt14 PE=2 SV=1	16.2887	10	197	3	0	485	52.651	5.16	46000000	NA	NA	NA	NA	13000000	0.947	3927.73	10	46000000	13000000	0.333333	0.333333	3.53846	0.247445
Q4KLG2	GTPase IMAP family member 8 OS=Rattus norvegicus GN=Gimap8 PE=2 SV=1	18.0233	7	30	7	1	688	77.023	8.19	27000000	8800000	5300000	3300000	3700000	4700000	0.327	138.718	7	13700000	3900000	1	1	3.51282	0.245652
Q5UT97	MHC class II antigen OS=Rattus norvegicus GN=RT1-Bb PE=2 SV=1	28.5171	6	59	2	0	263	30.089	7.83	NA	NA	27000000	7900000	NA	NA	1.336	536.163	6	27000000	7900000	0.333333	0.333333	3.41772	0.239002
Q8VI32	Activated B cell RT1Bl alpha chain OS=Rattus norvegicus PE=2 SV=1	29.6875	4	36	2	1	256	28.456	4.94	28000000	NA	NA	6500000	NA	10000000	0.848	248.121	4	28000000	8250000	0.333333	0.666667	3.39394	0.237338
Q6Q7Y5	Guanine nucleotide-binding protein subunit alpha-13 OS=Rattus norvegicus GN=Gna13 PE=1 SV=1	41.3793	13	198	11	1	377	43.984	8.21	200000000	210000000	240000000	160000000	15000000	17000000	1.783	3707.42	13	2.16667e+08	64000000	1	1	3.38542	0.236742
F1SW39	PC4 and SFRS1 interacting protein 1 OS=Rattus norvegicus GN=Psip1 PE=1 SV=1	7.95455	4	26	3	1	528	59.579	9.13	NA	NA	21000000	5700000	NA	6900000	0.198	202.799	4	21000000	6300000	0.333333	0.666667	3.33333	0.2331
F1LRV6	GMP reductase OS=Rattus norvegicus GN=Gmpr PE=3 SV=1	8.4058	2	14	2	1	345	37.434	6.98	15000000	NA	NA	NA	4500000	NA	0.194	53.79	2	15000000	4500000	0.333333	0.333333	3.33333	0.2331
P17559	Uteroglobin OS=Rattus norvegicus GN=Scgb1a1 PE=1 SV=2	25	4	267	4	1	96	10.443	5.01	1800000000	2200000000	1400000000	490000000	580000000	560000000	55.234	7119.17	4	1800000000	5.43333e+08	1	1	3.31288	0.23167
D3ZNJ5	Protein Inmt OS=Rattus norvegicus GN=Inmt PE=1 SV=1	43.9394	9	139	9	1	264	29.476	6.01	130000000	36000000	57000000	31000000	NA	15000000	4.995	2995.17	9	7.43333e+07	23000000	1	0.666667	3.23188	0.226006
Q9TQA7	Class II MHC RT1.D(A) beta chain OS=Rattus norvegicus GN=RT1.D(a) PE=2 SV=1	16.4751	5	49	2	0	261	29.477	8.53	NA	NA	30000000	NA	NA	10000000	0.65	375.872	5	30000000	10000000	0.333333	0.333333	3	0.20979
P63095	Guanine nucleotide-binding protein G(s) subunit alpha isoforms short OS=Rattus norvegicus GN=Gnas PE=1 SV=1	39.0863	13	142	12	1	394	45.635	5.96	22000000	16000000	25000000	4400000	9400000	7800000	1.512	2015.63	13	21000000	7200000	1	1	2.91667	0.203963
D4A702	Protein Synpo2 OS=Rattus norvegicus GN=Synpo2 PE=1 SV=2	9.03328	8	24	8	1	1262	135.941	8.51	NA	6400000	NA	NA	2200000	NA	0.27	397.531	8	6400000	2200000	0.333333	0.333333	2.90909	0.203433
M0R4V1	Protein Pcdhb7 OS=Rattus norvegicus GN=Pcdhb7 PE=4 SV=2	2.41838	1	14	1	1	827	90.46	4.92	6000000	5200000	5000000	NA	NA	1900000	0.055	0	1	5400000	1900000	1	0.333333	2.84211	0.198749
Q5M7A4	Ubiquitin-like modifier-activating enzyme 5 OS=Rattus norvegicus GN=Uba5 PE=1 SV=1	7.19603	2	4	2	1	403	44.866	4.96	NA	NA	4800000	NA	1700000	NA	0.233	62.5055	2	4800000	1700000	0.333333	0.333333	2.82353	0.19745
Q6P7D2	Arginyl aminopeptidase (Aminopeptidase B) OS=Rattus norvegicus GN=Rnpep PE=2 SV=1	40	20	281	20	1	650	72.557	5.67	28000000	110000000	28000000	20000000	19000000	20000000	2.981	4372.93	20	5.53333e+07	1.96667e+07	1	1	2.81356	0.196752
B2B9A9	Ephrin B2 OS=Rattus norvegicus GN=Efnb2 PE=2 SV=1	10.7143	3	19	3	1	336	37.258	8.88	16000000	11000000	8700000	6300000	NA	2200000	0.334	286.328	3	11900000	4250000	1	0.666667	2.8	0.195804
Q9WUW2	Vesicle associated membrane protein 2B OS=Rattus norvegicus GN=Vamp2 PE=2 SV=1	29.6296	4	93	1	1	135	14.5	5.55	9800000	12000000	9100000	4600000	3000000	3700000	2.594	2925.16	4	10300000	3.76667e+06	1	1	2.73451	0.191225
D4A164	Protein Nebl OS=Rattus norvegicus GN=Nebl PE=1 SV=2	10.0493	9	125	9	1	1015	116.026	7.83	45000000	68000000	29000000	19000000	10000000	23000000	0.411	2347.38	9	4.73333e+07	1.73333e+07	1	1	2.73077	0.190963
F1LN42	Protein Tns1 OS=Rattus norvegicus GN=Tns1 PE=1 SV=2	53.955	67	1631	64	1	1909	203.784	7.77	170000000	210000000	130000000	65000000	75000000	47000000	5.432	24191.8	67	170000000	6.23333e+07	1	1	2.72727	0.190718
D3ZKP9	Voltage-dependent calcium channel subunit alpha-2/delta-1 OS=Rattus norvegicus GN=Cacna2d1 PE=1 SV=3	13.1868	12	120	12	1	1092	123.622	5.31	11000000	14000000	14000000	4100000	5600000	4800000	0.432	986.783	12	13000000	4.83333e+06	1	1	2.68966	0.188088
M0RBA8	Protein Eng OS=Rattus norvegicus GN=Eng PE=1 SV=2	27.7539	14	211	14	1	699	74.882	6.27	56000000	34000000	36000000	22000000	15000000	9900000	1.448	2544.09	14	42000000	1.56333e+07	1	1	2.68657	0.187872
D3ZWA8	Protein Appl1 OS=Rattus norvegicus GN=Appl1 PE=1 SV=3	27.4218	13	97	13	1	671	75.355	5.68	9800000	25000000	14000000	4300000	NA	8000000	1.054	1077.46	13	1.62667e+07	6150000	1	0.666667	2.64499	0.184964
O35353	Guanine nucleotide-binding protein subunit beta-4 OS=Rattus norvegicus GN=Gnb4 PE=2 SV=4	47.3529	12	371	5	1	340	37.339	6.16	NA	15000000	17000000	8700000	NA	3500000	3.489	7542.59	12	16000000	6100000	0.666667	0.666667	2.62295	0.183423
Q499V8	Specifically androgen-regulated gene protein OS=Rattus norvegicus GN=Sarg PE=1 SV=2	13.0795	6	50	6	1	604	64.573	9.44	20000000	20000000	12000000	4600000	NA	8800000	0.326	691.481	6	1.73333e+07	6700000	1	0.666667	2.58706	0.180914
D2E6K0	NADH-ubiquinone oxidoreductase chain 4 OS=Rattus norvegicus GN=ND4 PE=3 SV=1	5.22876	2	9	2	1	459	51.798	9.41	6700000	NA	NA	NA	2600000	NA	0.359	129.713	2	6700000	2600000	0.333333	0.333333	2.57692	0.180204
Q3B8Q1	Nucleolar RNA helicase 2 OS=Rattus norvegicus GN=Ddx21 PE=2 SV=1	12.9156	9	30	9	1	782	85.913	9.33	NA	14000000	NA	5000000	5700000	5700000	0.35	478.185	9	14000000	5.46667e+06	0.333333	1	2.56098	0.179089
A0A0G2JVT8	Protein LOC500013 OS=Rattus norvegicus GN=LOC500013 PE=1 SV=1	2.97158	4	12	4	1	1548	178.658	7.47	NA	5200000	7000000	NA	2400000	NA	0.093	165.58	4	6100000	2400000	0.666667	0.333333	2.54167	0.177739
P36365	Dimethylaniline monooxygenase [N-oxide-forming] 1 OS=Rattus norvegicus GN=Fmo1 PE=1 SV=2	38.7218	18	371	18	1	532	59.787	8.28	84000000	60000000	88000000	44000000	25000000	23000000	2.665	8817.38	18	7.73333e+07	3.06667e+07	1	1	2.52174	0.176345
P16970	ATP-binding cassette sub-family D member 3 OS=Rattus norvegicus GN=Abcd3 PE=1 SV=3	14.871	7	68	7	1	659	75.267	9.25	51000000	33000000	25000000	20000000	17000000	7100000	0.389	532.983	7	3.63333e+07	14700000	1	1	2.47166	0.172843
Q710E6	SUN domain-containing ossification factor OS=Rattus norvegicus GN=Suco PE=2 SV=1	2.63368	1	8	1	1	1253	139.173	5.08	9500000	9700000	NA	NA	NA	3900000	0.06	0	1	9600000	3900000	0.666667	0.333333	2.46154	0.172136
Q63910	Alpha globin OS=Rattus norvegicus GN=Hba-a3 PE=1 SV=2	61.2676	8	193	6	1	142	15.515	8.22	NA	8100000	16000000	NA	4900000	NA	9	1233.24	8	12050000	4900000	0.666667	0.333333	2.45918	0.171971
D3ZCF8	Protein Abca8 OS=Rattus norvegicus GN=Abca8a PE=1 SV=3	19.0887	23	251	23	1	1624	184.775	7.25	27000000	24000000	20000000	11000000	12000000	5900000	0.768	3885.7	23	2.36667e+07	9.63333e+06	1	1	2.45675	0.171801
D3ZMX6	Protein Sntb2 OS=Rattus norvegicus GN=Sntb2 PE=1 SV=3	40.4215	19	306	18	1	522	56.49	8.69	39000000	44000000	42000000	18000000	20000000	13000000	3.375	4290.65	19	4.16667e+07	17000000	1	1	2.45098	0.171397
G3V6B0	Protein LOC103689979 OS=Rattus norvegicus GN=Pdxdc1 PE=1 SV=1	8.40764	5	49	5	1	785	86.916	5.53	9000000	15000000	120000000	20000000	17000000	22000000	0.243	556.736	5	48000000	1.96667e+07	1	1	2.44068	0.170677
A0A0A0MXX8	F-BAR domain only protein 2 OS=Rattus norvegicus GN=Fcho2 PE=1 SV=2	10.2596	6	76	6	1	809	88.657	6.89	19000000	5900000	27000000	7200000	7900000	6300000	0.259	373.795	6	17300000	7.13333e+06	1	1	2.42523	0.169597
A0A0G2K0Q8	Protein Susd2 OS=Rattus norvegicus GN=Susd2 PE=1 SV=1	30.9091	19	293	19	1	825	90.617	6.39	58000000	91000000	71000000	42000000	32000000	17000000	2.675	6753.04	19	7.33333e+07	3.03333e+07	1	1	2.41758	0.169062
A0A0G2JSI1	4-trimethylaminobutyraldehyde dehydrogenase OS=Rattus norvegicus GN=Aldh9a1 PE=1 SV=1	49.497	19	401	19	1	497	54.015	6.67	270000000	150000000	96000000	71000000	76000000	67000000	2.849	8685.12	19	172000000	7.13333e+07	1	1	2.41121	0.168616
A0A0U1RS13	SH3 and multiple ankyrin repeat domains protein 3 (Fragment) OS=Rattus norvegicus GN=Shank3 PE=1 SV=1	7.95386	10	64	1	1	1647	174.913	8.54	18000000	17000000	14000000	6700000	8200000	5500000	0.243	827.212	10	1.63333e+07	6800000	1	1	2.40196	0.167969
Q68FQ9	LanC lantibiotic synthetase component C-like 2 (Bacterial) OS=Rattus norvegicus GN=Lancl2 PE=1 SV=1	7.55556	3	8	3	1	450	50.936	7.46	NA	4800000	NA	2000000	NA	NA	0.259	91.0403	3	4800000	2000000	0.333333	0.333333	2.4	0.167832
Q5I0E1	Leucine-rich alpha-2-glycoprotein 1 OS=Rattus norvegicus GN=Lrg1 PE=2 SV=1	18.3735	5	22	5	1	332	36.297	7.23	4100000	10000000	65000000	NA	NA	11000000	0.778	351.493	5	2.63667e+07	11000000	1	0.333333	2.39697	0.16762
D3ZD19	Extracellular link domain-containing 1 (Predicted) OS=Rattus norvegicus GN=Lyve1 PE=1 SV=1	12.828	4	80	4	1	343	37.244	7.72	36000000	31000000	27000000	12000000	19000000	8800000	0.492	2007.15	4	3.13333e+07	1.32667e+07	1	1	2.36181	0.165161
Q5EB94	Myocardial zonula adherens protein OS=Rattus norvegicus GN=Myzap PE=1 SV=1	37.5536	15	145	15	1	466	53.922	6.6	16000000	23000000	18000000	9500000	6700000	8000000	1.424	3005.33	15	19000000	8.06667e+06	1	1	2.35537	0.164711
D3ZVB7	Osteoglycin (Predicted) OS=Rattus norvegicus GN=Ogn PE=1 SV=1	33.8926	8	435	8	1	298	34.048	6.19	160000000	140000000	170000000	94000000	69000000	37000000	1.721	7458.4	8	1.56667e+08	6.66667e+07	1	1	2.35	0.164336
Q6P6R6	Transglutaminase 2, C polypeptide OS=Rattus norvegicus GN=Tgm2 PE=2 SV=1	59.9125	35	1443	1	1	686	76.887	5.07	NA	NA	360000000	140000000	170000000	150000000	10.007	36851	35	360000000	1.53333e+08	0.333333	1	2.34783	0.164184
P00770	Mast cell protease 2 OS=Rattus norvegicus GN=Mcpt2 PE=1 SV=1	29.1498	6	95	6	1	247	27.084	8.03	17000000	90000000	15000000	14000000	14000000	24000000	2.162	1297.8	6	4.06667e+07	1.73333e+07	1	1	2.34615	0.164067
D3ZL10	Protein Col6a6 OS=Rattus norvegicus GN=Col6a6 PE=1 SV=3	23.4541	41	506	34	1	2264	246.641	6.71	32000000	33000000	31000000	13000000	17000000	11000000	1.083	8357.46	41	32000000	1.36667e+07	1	1	2.34146	0.163739
Q5QD51	A-kinase anchor protein 12 OS=Rattus norvegicus GN=Akap12 PE=1 SV=1	16.7161	24	254	24	1	1687	181.001	4.4	48000000	41000000	28000000	17000000	21000000	12000000	0.886	3377.14	24	39000000	1.66667e+07	1	1	2.34	0.163636
D4A582	Protein Zdbf2 OS=Rattus norvegicus GN=Zdbf2 PE=4 SV=3	0.631313	2	14	2	1	2376	261.789	5.08	100000000	NA	NA	NA	43000000	NA	0.032	57.5137	2	100000000	43000000	0.333333	0.333333	2.32558	0.162628
A0A0G2JZ40	Protein Reck OS=Rattus norvegicus GN=Reck PE=4 SV=1	9.77366	7	41	7	1	972	105.901	6.84	11000000	8300000	13000000	4500000	5600000	3900000	0.267	1396.75	7	1.07667e+07	4.66667e+06	1	1	2.30714	0.161339
F1M865	Sorbin and SH3 domain-containing protein 1 OS=Rattus norvegicus GN=Sorbs1 PE=1 SV=1	26.6216	17	123	17	1	740	83.001	7.64	12000000	14000000	12000000	NA	6800000	4200000	0.856	837.37	17	1.26667e+07	5500000	1	0.666667	2.30303	0.161051
P63219	Guanine nucleotide-binding protein G(I)/G(S)/G(O) subunit gamma-5 OS=Rattus norvegicus GN=Gng5 PE=3 SV=1	77.9412	4	95	4	1	68	7.314	9.85	100000000	89000000	130000000	45000000	55000000	40000000	5.813	1676.48	4	1.06333e+08	4.66667e+07	1	1	2.27857	0.159341
O46875	MHC class Ib alpha chain (Fragment) OS=Rattus norvegicus PE=2 SV=1	13.2184	4	82	2	1	348	39.083	5.78	6600000	NA	NA	NA	NA	2900000	0.668	1306.42	4	6600000	2900000	0.333333	0.333333	2.27586	0.159151
P06238	Alpha-2-macroglobulin OS=Rattus norvegicus GN=A2m PE=2 SV=2	46.9429	55	373	19	1	1472	163.682	6.29	NA	NA	300000000	8100000	NA	NA	1.069	126.037	6	81000000	3.56667e+07	0.666667	1	2.27103	0.158813
Q7TP38	Amine oxidase OS=Rattus norvegicus GN=Psme3 PE=2 SV=1	15.6707	19	631	17	1	1640	183.415	7.46	280000000	270000000	290000000	150000000	110000000	110000000	0.986	11885.1	19	280000000	1.23333e+08	1	1	2.27027	0.15876
P61354	60S ribosomal protein L27 OS=Rattus norvegicus GN=Rpl27 PE=2 SV=2	17.6471	3	26	3	1	136	15.788	10.56	11000000	33000000	4700000	3300000	13000000	5200000	0.638	131.92	3	1.62333e+07	7.16667e+06	1	1	2.26512	0.1584
P19686	Guanylate cyclase soluble subunit alpha-3 OS=Rattus norvegicus GN=Gucy1a3 PE=1 SV=1	38.8406	22	284	22	1	690	77.517	7.06	25000000	38000000	38000000	16000000	17000000	12000000	2.495	3716.05	22	3.36667e+07	15000000	1	1	2.24444	0.156954
B5DF05	Protein Rasip1 OS=Rattus norvegicus GN=Rasip1 PE=1 SV=1	30.8562	12	139	12	1	619	67.773	5.44	18000000	26000000	35000000	9100000	17000000	9100000	1.581	2114.73	12	2.63333e+07	1.17333e+07	1	1	2.24432	0.156945
Q920Q0	Paralemmin-1 OS=Rattus norvegicus GN=Palm PE=1 SV=1	6.26632	2	19	2	1	383	41.901	4.91	8800000	18000000	23000000	8200000	8200000	5800000	0.172	430.241	2	16600000	7400000	1	1	2.24324	0.15687
Q6P762	Alpha-mannosidase OS=Rattus norvegicus GN=Man2b1 PE=1 SV=1	8.6224	6	29	6	1	1009	114.255	8.66	NA	9300000	120000000	NA	NA	3800000	0.239	549.41	4	24000000	10700000	0.666667	1	2.24299	0.156852
P41562	Isocitrate dehydrogenase [NADP] cytoplasmic OS=Rattus norvegicus GN=Idh1 PE=1 SV=1	55.7971	20	405	18	1	414	46.705	6.99	60000000	82000000	460000000	77000000	93000000	99000000	3.375	5993.86	20	2.00667e+08	8.96667e+07	1	1	2.23792	0.156498
P20595	Guanylate cyclase soluble subunit beta-1 OS=Rattus norvegicus GN=Gucy1b3 PE=1 SV=2	40.5493	22	323	22	1	619	70.412	5.4	26000000	50000000	46000000	19000000	19000000	17000000	2.907	4732.3	22	4.06667e+07	1.83333e+07	1	1	2.21818	0.155118
Q9QYQ1	A1q (Fragment) OS=Rattus norvegicus GN=RT1-A1q PE=2 SV=1	19.7101	6	158	1	0	345	38.817	5.33	23000000	NA	NA	8800000	NA	12000000	0.978	3110.71	6	23000000	10400000	0.333333	0.666667	2.21154	0.154653
Q9JHM2	MHC class I protein OS=Rattus norvegicus GN=RT1-A3 PE=3 SV=1	19.7832	7	124	1	1	369	41.691	7.4	23000000	NA	NA	8800000	NA	12000000	1.043	2285.97	7	23000000	10400000	0.333333	0.666667	2.21154	0.154653
Q9TP50	Ak (Fragment) OS=Rattus norvegicus GN=RT1-Ak PE=2 SV=1	15.3623	5	104	2	0	345	38.725	5.77	23000000	NA	NA	8800000	NA	12000000	0.468	1851.25	5	23000000	10400000	0.333333	0.666667	2.21154	0.154653
B1PLB1	CD34 antigen (Predicted) OS=Rattus norvegicus GN=Cd34 PE=1 SV=1	23.5751	7	169	7	1	386	41.213	5.49	110000000	120000000	130000000	62000000	59000000	42000000	2.384	2549.49	7	120000000	5.43333e+07	1	1	2.20859	0.154447
A0A0G2K1M7	Anoctamin OS=Rattus norvegicus GN=Ano6 PE=1 SV=1	19.3619	15	151	15	1	909	105.771	7.74	15000000	27000000	23000000	12000000	7500000	10000000	0.795	1786.99	15	2.16667e+07	9.83333e+06	1	1	2.20339	0.154083
D3Z9P1	Follicular lymphoma variant translocation 1 (Predicted), isoform CRA_a OS=Rattus norvegicus GN=Kdsr PE=1 SV=1	15.3614	4	47	4	1	332	36.013	8.29	27000000	29000000	30000000	8200000	24000000	6900000	0.65	797.43	4	2.86667e+07	1.30333e+07	1	1	2.19949	0.15381
G3V6D8	Myosin-3 OS=Rattus norvegicus GN=Myh3 PE=1 SV=1	14.8969	30	175	2	0	1940	223.647	5.81	NA	89000000	NA	NA	4500000	NA	2.162	244.018	2	510000000	2.33333e+08	0.333333	1	2.18571	0.152847
P07687	Epoxide hydrolase 1 OS=Rattus norvegicus GN=Ephx1 PE=1 SV=1	47.4725	18	201	18	1	455	52.548	8.51	35000000	34000000	40000000	15000000	20000000	15000000	2.831	1989.62	18	3.63333e+07	1.66667e+07	1	1	2.18	0.152448
Q4VBH1	Ighg protein OS=Rattus norvegicus GN=Ighg PE=1 SV=1	26.7666	8	196	5	1	467	51.618	6.6	33000000	NA	450000000	8000000	NA	NA	1.462	416.324	8	2.86667e+07	13300000	1	0.666667	2.15539	0.150726
D3ZM97	Olfactory receptor OS=Rattus norvegicus GN=Olr1121 PE=3 SV=1	2.23642	1	31	1	1	313	34.764	8.79	290000000	300000000	300000000	190000000	130000000	95000000	0.155	606.535	1	2.96667e+08	1.38333e+08	1	1	2.14458	0.149971
P15129	Cytochrome P450 4B1 OS=Rattus norvegicus GN=Cyp4b1 PE=1 SV=3	35.6164	15	262	15	1	511	58.898	8.65	59000000	58000000	95000000	30000000	40000000	29000000	1.683	4671.88	15	7.06667e+07	33000000	1	1	2.14141	0.149749
Q66H98	Serum deprivation-response protein OS=Rattus norvegicus GN=Sdpr PE=1 SV=3	49.1607	19	673	19	1	417	46.358	5.29	770000000	840000000	690000000	420000000	310000000	350000000	4.532	13237.4	19	7.66667e+08	360000000	1	1	2.12963	0.148925
A0A096MK41	Protein LOC259246 OS=Rattus norvegicus GN=LOC259245 PE=1 SV=1	13.8122	2	18	2	1	181	20.905	5.92	NA	16000000	6400000	NA	5600000	5000000	0.585	167.459	2	11200000	5300000	0.666667	0.666667	2.11321	0.147777
P07483	Fatty acid-binding protein, heart OS=Rattus norvegicus GN=Fabp3 PE=1 SV=2	48.8722	6	45	6	1	133	14.766	6.33	NA	150000000	NA	16000000	7300000	NA	0.675	1026.9	12	17500000	8300000	1	1	2.10843	0.147443
Q9WVH8	Fibulin-5 OS=Rattus norvegicus GN=Fbln5 PE=2 SV=1	26.3393	10	405	10	1	448	50.127	4.67	220000000	250000000	210000000	90000000	140000000	94000000	3.062	11591.9	10	2.26667e+08	108000000	1	1	2.09877	0.146767
P97519	Hydroxymethylglutaryl-CoA lyase, mitochondrial OS=Rattus norvegicus GN=Hmgcl PE=2 SV=1	18.4615	5	34	5	1	325	34.17	8.41	4500000	NA	17000000	6700000	7600000	1100000	0.778	506.59	5	10750000	5.13333e+06	0.666667	1	2.09416	0.146444
Q5M876	N-acyl-aromatic-L-amino acid amidohydrolase (carboxylate-forming) OS=Rattus norvegicus GN=Acy3 PE=1 SV=1	7.52351	2	24	2	1	319	35.397	5.64	12000000	14000000	11000000	5900000	NA	NA	0.468	673.283	2	1.23333e+07	5900000	1	0.333333	2.0904	0.146182
B1WBN8	Caveolin OS=Rattus norvegicus GN=Cav1 PE=2 SV=1	63.9456	8	329	1	1	147	17.092	5.49	84000000	110000000	83000000	46000000	54000000	33000000	7.254	2403.85	8	9.23333e+07	4.43333e+07	1	1	2.08271	0.145644
G3V617	Mitogen-activated protein kinase OS=Rattus norvegicus GN=Mapk14 PE=1 SV=1	24.7222	8	116	7	1	360	41.247	5.88	72000000	NA	3000000	7900000	11000000	4700000	0.861	4634.71	30	27000000	1.29667e+07	1	1	2.08226	0.145613
A0A0G2JTX7	Protein Col6a5 OS=Rattus norvegicus GN=Col6a5 PE=1 SV=1	34.8404	79	1831	72	1	2632	288.803	6.39	160000000	260000000	200000000	96000000	110000000	92000000	3.001	34749.1	79	2.06667e+08	9.93333e+07	1	1	2.08054	0.145492
Q68FR2	Bridging integrator 2 OS=Rattus norvegicus GN=Bin2 PE=1 SV=1	8.6785	4	30	3	1	507	55.085	4.88	NA	NA	24000000	4200000	3500000	27000000	0.283	206.174	4	24000000	1.15667e+07	0.333333	1	2.07493	0.1451
Q99MA2	Membrane-bound aminopeptidase P OS=Rattus norvegicus GN=Xpnpep2 PE=1 SV=1	44.8071	22	539	22	1	674	76.032	5.74	130000000	120000000	140000000	72000000	57000000	59000000	3.19	11180.5	22	130000000	6.26667e+07	1	1	2.07447	0.145068
G3V885	Myosin-6 OS=Rattus norvegicus GN=Myh6 PE=1 SV=2	61.4035	119	840	33	1	1938	223.243	5.73	NA	480000000	NA	70000000	25000000	NA	0.701	1892.04	2	11200000	5400000	1	1	2.07407	0.14504
P10824	Guanine nucleotide-binding protein G(i) subunit alpha-1 OS=Rattus norvegicus GN=Gnai1 PE=1 SV=3	30.5085	9	251	4	1	354	40.319	5.97	5300000	7300000	10000000	3000000	5800000	2100000	1.471	4346.04	9	7.53333e+06	3.63333e+06	1	1	2.07339	0.144993
Q920H8	Hephaestin OS=Rattus norvegicus GN=Heph PE=1 SV=1	1.1236	1	6	1	1	1157	129.511	6.15	73000000	NA	NA	NA	NA	2600000	0.484	454.375	6	1.34667e+07	6500000	1	1	2.07179	0.144881
Q4V8C3	Echinoderm microtubule-associated protein-like 1 OS=Rattus norvegicus GN=Eml1 PE=1 SV=2	36.2408	22	211	21	1	814	89.746	7.02	29000000	30000000	28000000	14000000	14000000	14000000	1.859	2123.85	22	29000000	14000000	1	1	2.07143	0.144855
A0A0G2K290	Uncharacterized protein OS=Rattus norvegicus PE=4 SV=1	30.6452	3	71	3	0	124	13.896	8.16	35000000	47000000	20000000	14000000	9300000	26000000	1.512	2048.43	3	34000000	1.64333e+07	1	1	2.06897	0.144683
P63025	Vesicle-associated membrane protein 3 OS=Rattus norvegicus GN=Vamp3 PE=1 SV=1	54.3689	5	104	2	1	103	11.473	8.5	40000000	32000000	27000000	17000000	19000000	12000000	4.623	3601.9	5	33000000	16000000	1	1	2.0625	0.144231
F1M0G3	Ectonucleoside triphosphate diphosphohydrolase 1 OS=Rattus norvegicus GN=Entpd1 PE=3 SV=3	28.9628	12	251	12	1	511	57.3	7.55	67000000	63000000	61000000	31000000	31000000	31000000	2.415	4432.61	12	6.36667e+07	31000000	1	1	2.05376	0.14362
Q6AYS8	Estradiol 17-beta-dehydrogenase 11 OS=Rattus norvegicus GN=Hsd17b11 PE=2 SV=1	26.1745	7	111	7	1	298	32.917	8.63	59000000	26000000	32000000	20000000	14000000	23000000	1.848	1564.39	7	39000000	19000000	1	1	2.05263	0.143541
D3ZRN3	Protein Actbl2 OS=Rattus norvegicus GN=Actbl2 PE=1 SV=1	24.2021	10	1555	3	1	376	41.936	5.49	5600000000	5100000000	2800000000	180000000	190000000	3500000000	0.274	57.9578	1	5.53333e+06	2700000	1	0.333333	2.04938	0.143313
P18614	Integrin alpha-1 OS=Rattus norvegicus GN=Itga1 PE=1 SV=1	20.339	23	390	22	1	1180	130.726	5.96	63000000	85000000	89000000	41000000	41000000	34000000	1.198	7288.35	23	79000000	3.86667e+07	1	1	2.0431	0.142874
A0A0G2K016	Protein Sun1 OS=Rattus norvegicus GN=Sun1 PE=1 SV=1	12.459	9	66	9	1	915	102.336	6.65	5500000	7100000	7000000	3300000	3100000	NA	0.534	575.977	9	6.53333e+06	3200000	1	0.666667	2.04167	0.142774
F1LNL2	Protein Smarca5 OS=Rattus norvegicus GN=Smarca5 PE=1 SV=2	11.5578	10	48	10	1	995	116.581	8.41	NA	7800000	2200000	6600000	30000000	4000000	1.918	5061.57	33	5300000	2600000	0.333333	0.333333	2.03846	0.14255
P16303	Carboxylesterase 1D OS=Rattus norvegicus GN=Ces1d PE=1 SV=2	43.0088	23	1103	7	1	565	62.108	6.54	530000000	590000000	590000000	380000000	230000000	230000000	7.767	15860	23	570000000	280000000	1	1	2.03571	0.142358
Q5I0E1	Leucine-rich alpha-2-glycoprotein 1 OS=Rattus norvegicus GN=Lrg1 PE=2 SV=1	18.3735	5	22	5	1	332	36.297	7.23	NA	NA	21000000	NA	2100000	NA	7.209	13223.1	21	570000000	280000000	1	1	2.03571	0.142358
D4AAV9	Tetraspanin OS=Rattus norvegicus GN=Tspan9 PE=1 SV=1	20	5	97	5	1	330	36.678	8.09	22000000	27000000	24000000	13000000	11000000	12000000	0.73	2192.71	5	2.43333e+07	12000000	1	1	2.02778	0.141803
A0A0G2K1P8	Protein Triobp OS=Rattus norvegicus GN=Triobp PE=1 SV=1	7.28805	14	138	13	1	2017	223.787	7.87	22000000	13000000	12000000	6900000	8900000	7600000	0.207	1478.45	14	1.56667e+07	7800000	1	1	2.00855	0.140458
Q9WUH9	Fibrillin-2 OS=Rattus norvegicus GN=Fbn2 PE=2 SV=1	1.82381	5	189	4	0	2906	313.158	4.87	77000000	120000000	110000000	49000000	55000000	49000000	0.116	4102.54	5	1.02333e+08	51000000	1	1	2.00654	0.140317
A0A0G2K654	RCG45246 OS=Rattus norvegicus GN=Hist1h1c PE=1 SV=1	46.2264	14	698	4	1	212	21.304	11	760000000	1000000000	820000000	350000000	480000000	460000000	5.449	12097.9	14	860000000	430000000	1	1	2	0.13986
F1M3A0	Protein Fbrsl1 OS=Rattus norvegicus GN=Fbrsl1 PE=4 SV=3	0.855746	1	15	1	1	818	87.586	9.09	14000000	17000000	20000000	NA	3700000000	NA	0.045	223.154	1	17000000	3700000000	1	0.333333	0.00459459	-0.00459459
Q4G075	Leukocyte elastase inhibitor A OS=Rattus norvegicus GN=Serpinb1a PE=1 SV=1	47.4934	19	220	14	1	379	42.7	6.32	4000000	9500000	13000000	140000000	150000000	200000000	9.857	4598.4	19	8.83333e+06	1.63333e+08	1	1	0.0540816	-0.0540816
A0A0G2K929	Protein Cep290 OS=Rattus norvegicus GN=Cep290 PE=4 SV=1	0.253991	1	17	1	1	2756	320.536	6.24	2900000	NA	5000000	NA	73000000	NA	0.008	69.1859	1	3950000	73000000	0.666667	0.333333	0.0541096	-0.0541096
D3ZX42	G protein-coupled receptor 21 (Predicted), isoform CRA_a OS=Rattus norvegicus GN=Rabgap1 PE=1 SV=1	5.07042	5	23	5	1	1065	120.89	5.27	8700000	8700000	9000000	NA	6500000	300000000	0.135	200.107	5	8800000	153250000	1	0.666667	0.0574225	-0.0574225
A0A0H2UI19	Coagulation factor XII OS=Rattus norvegicus GN=F12 PE=1 SV=1	18.0763	10	37	10	1	603	66.674	7.3	1900000	NA	NA	NA	6000000	38000000	1.069	223.29	10	1900000	22000000	0.333333	0.666667	0.0863636	-0.0863636
Q5RKH1	Serine/threonine-protein kinase PRP4 homolog OS=Rattus norvegicus GN=Prpf4b PE=1 SV=1	2.78054	2	13	2	1	1007	116.935	10.23	2600000	NA	2800000	24000000	30000000	NA	0.053	31.4901	2	2700000	27000000	0.666667	0.666667	0.1	-0.1
B1H282	Glycosyltransferase 25 domain containing 1 OS=Rattus norvegicus GN=Colgalt1 PE=1 SV=1	11.9935	8	44	8	1	617	71.069	7.12	NA	NA	1100000	9800000	11000000	8000000	0.48	738.529	8	1100000	9600000	0.333333	1	0.114583	-0.114583
A0A0H2UI19	Coagulation factor XII OS=Rattus norvegicus GN=F12 PE=1 SV=1	18.0763	10	37	10	1	603	66.674	7.3	10000000	7400000	18000000	5700000	NA	NA	5.813	1985.62	3	24300000	1.63333e+08	1	1	0.148776	-0.148776
G3V7Z8	Poly(A) binding protein, nuclear 1, isoform CRA_a OS=Rattus norvegicus GN=Pabpn1 PE=1 SV=1	20.1987	4	41	4	1	302	32.291	5.17	8300000	10000000	12000000	35000000	58000000	52000000	0.585	1102.58	4	10100000	4.83333e+07	1	1	0.208966	-0.208966
Q811Y3	Neutrophil cytosolic factor 1 OS=Rattus norvegicus GN=Ncf1 PE=2 SV=1	30.3342	11	55	11	1	389	44.652	9.17	NA	4700000	NA	8800000	28000000	30000000	1.352	494.598	11	4700000	2.22667e+07	0.333333	1	0.211078	-0.211078
P18445	60S ribosomal protein L27a OS=Rattus norvegicus GN=Rpl27a PE=1 SV=3	34.4595	5	58	5	1	148	16.608	11.12	NA	1600000	13000000	31000000	38000000	33000000	0.896	970.277	5	7300000	34000000	0.666667	1	0.214706	-0.214706
B0BNC0	Ckmt2 protein OS=Rattus norvegicus GN=Ckmt2 PE=2 SV=1	44.6301	15	112	13	1	419	47.443	8.4	NA	85000000	NA	4700000	NA	NA	0.075	124.065	1	520000	2300000	0.333333	0.333333	0.226087	-0.226087
A0A0G2K3L9	Protein Ppfia1 OS=Rattus norvegicus GN=Ppfia1 PE=1 SV=1	3.26264	4	27	3	1	1226	137.901	6.37	2300000	3500000	3200000	2000000	29000000	8700000	0.087	314.701	4	3000000	1.32333e+07	1	1	0.2267	-0.2267
A0A0G2JVM2	Protein Mia3 OS=Rattus norvegicus GN=Mia3 PE=1 SV=1	2.54176	4	9	4	1	1377	153.375	5.21	NA	1500000	NA	NA	NA	6600000	0.084	39.6871	4	1500000	6600000	0.333333	0.333333	0.227273	-0.227273
Q53Z83	Metallothionein OS=Rattus norvegicus GN=Mt1 PE=1 SV=1	55.7377	2	17	2	1	61	6.001	7.96	NA	NA	7300000	22000000	29000000	43000000	1.154	682.41	2	7300000	3.13333e+07	0.333333	1	0.232979	-0.232979
P50753	Troponin T, cardiac muscle OS=Rattus norvegicus GN=Tnnt2 PE=1 SV=2	30.7692	8	42	8	1	299	35.709	4.98	NA	55000000	NA	6200000	5000000	NA	0.546	434.237	7	5.03333e+06	20500000	1	1	0.245528	-0.245528
D4A565	NADH dehydrogenase (Ubiquinone) 1 beta subcomplex, 5 (Predicted), isoform CRA_b OS=Rattus norvegicus GN=Ndufb5 PE=1 SV=1	16.9312	3	31	3	1	189	21.65	9.47	NA	NA	3600000	23000000	4000000	15000000	0.438	228.29	3	3600000	14000000	0.333333	1	0.257143	-0.257143
D3ZIY3	Protein Ythdf3 OS=Rattus norvegicus GN=Ythdf3 PE=1 SV=1	13.1624	7	48	5	1	585	63.895	9.04	1500000	NA	NA	2700000	7500000	7200000	0.911	274.119	7	1500000	5800000	0.333333	1	0.258621	-0.258621
Q9WTV1	Chitinase-3-like protein 1 OS=Rattus norvegicus GN=Chi3l1 PE=2 SV=3	43.0446	13	70	13	1	381	42.365	8.78	NA	NA	6700000	22000000	22000000	30000000	2.455	1271.8	13	6700000	2.46667e+07	0.333333	1	0.271622	-0.271622
Q5PPJ6	Leucyl-tRNA synthetase OS=Rattus norvegicus GN=Lars PE=1 SV=1	11.8846	11	92	11	1	1178	134.192	7.28	6900000	5000000	7400000	45000000	16000000	9900000	0.342	420.241	11	6.43333e+06	2.36333e+07	1	1	0.272214	-0.272214
D3Z9J8	Sodium-coupled neutral amino acid transporter 2 OS=Rattus norvegicus GN=Sat2 PE=1 SV=1	8.82353	2	21	2	1	170	19.277	7.21	3400000	3000000	23000000	39000000	NA	32000000	0.359	339.575	2	9800000	35500000	1	0.666667	0.276056	-0.276056
G3V8L7	Integrin alpha M OS=Rattus norvegicus GN=Itgam PE=1 SV=1	32.841	29	167	29	1	1151	127.112	6.76	4400000	6100000	13000000	23000000	25000000	37000000	1.705	3639.05	29	7.83333e+06	2.83333e+07	1	1	0.276471	-0.276471
G3V8T9	Apoptosis regulator BAX OS=Rattus norvegicus GN=Bax PE=1 SV=1	24.4792	4	23	4	1	192	21.431	5.01	4400000	NA	NA	NA	18000000	13000000	0.931	436.404	4	4400000	15500000	0.333333	0.666667	0.283871	-0.283871
G3V885	Myosin-6 OS=Rattus norvegicus GN=Myh6 PE=1 SV=2	61.4035	119	840	33	1	1938	223.243	5.73	NA	480000000	NA	70000000	25000000	NA	1.352	3597.66	12	13200000	4.48667e+07	0.666667	1	0.294205	-0.294205
P70617	Ninjurin-1 OS=Rattus norvegicus GN=Ninj1 PE=1 SV=1	7.89474	1	13	1	1	152	16.529	6.55	2700000	NA	2300000	NA	11000000	5900000	0.931	97.5994	1	2500000	8450000	0.666667	0.666667	0.295858	-0.295858
A4D0F6	Ac2-059 OS=Rattus norvegicus PE=2 SV=1	1.48196	3	12	3	0	1552	173.081	6.27	NA	3800000	NA	9500000	NA	16000000	0.068	126.394	3	3800000	12750000	0.333333	0.666667	0.298039	-0.298039
D3ZDE4	Deoxyguanosine kinase (Predicted), isoform CRA_a OS=Rattus norvegicus GN=Dguok PE=1 SV=1	16.9065	3	19	3	1	278	32.207	7.96	NA	9400000	NA	NA	NA	31000000	0.186	196.845	3	9400000	31000000	0.333333	0.333333	0.303226	-0.303226
D3ZXA6	Protein Pdpr OS=Rattus norvegicus GN=Pdpr PE=1 SV=1	5.01139	4	40	4	1	878	98.756	6.48	110000000	7600000	NA	5700000	6900000	3700000	1.825	2642.57	20	11700000	38500000	1	0.666667	0.303896	-0.303896
Q5BJP9	Phytanoyl-CoA dioxygenase domain-containing protein 1 OS=Rattus norvegicus GN=Phyhd1 PE=2 SV=1	9.96564	1	12	1	1	291	32.532	5.83	2500000	NA	NA	5400000	NA	11000000	0.136	152.327	1	2500000	8200000	0.333333	0.666667	0.304878	-0.304878
G3V9N0	Polyadenylate-binding protein OS=Rattus norvegicus GN=Pabpc4 PE=1 SV=2	15.3727	8	87	2	1	644	70.789	9.26	NA	4400000	6000000	29000000	12000000	10000000	0.468	2021.59	8	5200000	17000000	0.666667	1	0.305882	-0.305882
Q09167	Serine/arginine-rich splicing factor 5 OS=Rattus norvegicus GN=Srsf5 PE=1 SV=1	19.7026	5	62	4	1	269	30.873	11.56	5200000	3900000	NA	12000000	16000000	16000000	0.585	906.91	5	4550000	1.46667e+07	0.666667	1	0.310227	-0.310227
A0A0G2QC17	Protein phosphatase 2C, magnesium dependent, catalytic subunit, isoform CRA_a OS=Rattus norvegicus GN=Pdp1 PE=1 SV=1	4.26288	2	13	2	1	563	63.795	6.81	1700000	1500000	1200000	4300000	5100000	NA	0.113	128.209	2	1.46667e+06	4700000	1	0.666667	0.312057	-0.312057
O88496	Vitamin K-dependent gamma-carboxylase OS=Rattus norvegicus GN=Ggcx PE=1 SV=1	5.93668	3	17	3	1	758	87.423	7.91	NA	2400000	NA	5300000	11000000	6600000	0.245	447.688	3	2400000	7.63333e+06	0.333333	1	0.31441	-0.31441
O35095	Neurochondrin OS=Rattus norvegicus GN=Ncdn PE=1 SV=2	5.34979	3	20	3	1	729	78.873	5.62	NA	1600000	1300000	3700000	5400000	NA	0.212	71.497	3	1450000	4550000	0.666667	0.666667	0.318681	-0.318681
F1LRI5	Protein Gcn1l1 OS=Rattus norvegicus GN=Gcn1l1 PE=1 SV=3	12.7293	25	178	25	1	2671	292.886	7.3	5500000	6000000	7900000	40000000	10000000	9300000	0.321	2116.67	25	6.46667e+06	1.97667e+07	1	1	0.32715	-0.32715
B2RYI8	Papss1 protein OS=Rattus norvegicus GN=Papss1 PE=2 SV=1	10.2564	4	34	4	1	624	70.742	6.83	1400000	NA	3400000	6400000	12000000	3200000	0.278	945.64	4	2400000	7200000	0.666667	1	0.333333	-0.333333
D3ZHG3	Protein Ptk7 OS=Rattus norvegicus GN=Ptk7 PE=1 SV=3	24.036	14	106	14	1	778	86.21	7.9	16000000	26000000	31000000	93000000	24000000	100000000	0.73	1236.02	14	2.43333e+07	7.23333e+07	1	1	0.336406	-0.336406
F1M062	Protein Larp1 OS=Rattus norvegicus GN=Larp1 PE=1 SV=3	2.7927	2	7	2	1	931	106.874	8.21	NA	NA	2800000	NA	5600000	11000000	0.059	63.528	2	2800000	8300000	0.333333	0.666667	0.337349	-0.337349
M0R8T2	10-formyltetrahydrofolate dehydrogenase OS=Rattus norvegicus GN=Aldh1l1 PE=1 SV=2	3.96913	3	8	3	1	907	99.061	5.54	3100000	3000000	NA	NA	3000000	15000000	0.102	16.5767	3	3050000	9000000	0.666667	0.666667	0.338889	-0.338889
Q4V7C6	GMP synthase [glutamine-hydrolyzing] OS=Rattus norvegicus GN=Gmps PE=1 SV=1	20.3463	11	74	11	1	693	76.709	6.64	5400000	12000000	8200000	11000000	48000000	16000000	0.743	654.771	11	8.53333e+06	25000000	1	1	0.341333	-0.341333
P50115	Protein S100-A8 OS=Rattus norvegicus GN=S100a8 PE=1 SV=3	58.427	6	406	6	1	89	10.232	6.05	660000000	920000000	1000000000	2100000000	1500000000	3900000000	20.544	8213.79	6	860000000	2500000000	1	1	0.344	-0.344
G3V7D0	Matrix metallopeptidase 8 OS=Rattus norvegicus GN=Mmp8 PE=1 SV=1	27.0386	9	45	9	1	466	53.229	6.64	4100000	6200000	4400000	NA	NA	14000000	1.043	718.891	9	4900000	14000000	1	0.333333	0.35	-0.35
D3ZFP4	DNA helicase OS=Rattus norvegicus GN=Mcm3 PE=1 SV=3	15.6212	10	31	10	1	813	91.602	5.48	NA	NA	4900000	12000000	16000000	13000000	0.436	273.512	10	4900000	1.36667e+07	0.333333	1	0.358537	-0.358537
P04961	Proliferating cell nuclear antigen OS=Rattus norvegicus GN=Pcna PE=1 SV=1	44.8276	10	132	10	1	261	28.73	4.69	15000000	19000000	21000000	45000000	62000000	44000000	1.994	1636.61	10	1.83333e+07	5.03333e+07	1	1	0.364238	-0.364238
A0A0G2K022	Protein Rcn3 OS=Rattus norvegicus GN=Rcn3 PE=1 SV=1	33.8279	9	48	9	1	337	38.919	4.86	2900000	8700000	4800000	15000000	21000000	8900000	1.848	1352.95	9	5.46667e+06	1.49667e+07	1	1	0.365256	-0.365256
B5DEP7	Protein LOC687679 OS=Rattus norvegicus GN=Snrpg PE=1 SV=1	26.3158	3	37	3	1	76	8.49	8.88	18000000	27000000	19000000	65000000	58000000	52000000	1.683	417.189	3	2.13333e+07	5.83333e+07	1	1	0.365714	-0.365714
A0A0H2UHJ1	Protein S100-A9 OS=Rattus norvegicus GN=S100a9 PE=1 SV=1	69.9248	10	595	10	1	133	15.21	8.05	490000000	710000000	710000000	1300000000	1100000000	2800000000	9	6640.19	10	6.36667e+08	1.73333e+09	1	1	0.367308	-0.367308
G3V9W2	Tyrosine-protein kinase OS=Rattus norvegicus GN=Jak1 PE=1 SV=1	2.77537	2	13	2	1	1153	133.175	7.4	19000000	44000000	2300000	59000000	NA	NA	0.047	31.85	2	2.17667e+07	59000000	1	0.333333	0.368927	-0.368927
Q6LE95	Kininogen OS=Rattus norvegicus GN=Kng1l1 PE=4 SV=1	50	4	96	2	1	56	6.01	8.98	12000000	14000000	13000000	35000000	53000000	17000000	14.849	769.241	4	13000000	35000000	1	1	0.371429	-0.371429
P63326	40S ribosomal protein S10 OS=Rattus norvegicus GN=Rps10 PE=2 SV=1	53.3333	9	177	9	1	165	18.904	10.15	9000000	11000000	21000000	28000000	44000000	38000000	2.793	1277.4	9	1.36667e+07	3.66667e+07	1	1	0.372727	-0.372727
Q62715	Neutrophil antibiotic peptide NP-2 OS=Rattus norvegicus GN=Defa PE=1 SV=1	8.51064	1	20	1	1	94	10.295	7.65	130000000	140000000	270000000	NA	NA	480000000	0.389	323.25	1	180000000	480000000	1	0.333333	0.375	-0.375
M0R9I6	Aminomethyltransferase OS=Rattus norvegicus GN=Amt PE=1 SV=2	2.72953	1	4	1	1	403	44.459	9.96	NA	NA	2600000	NA	NA	6900000	0.166	48.89	1	2600000	6900000	0.333333	0.333333	0.376812	-0.376812
Q641X3	Beta-hexosaminidase subunit alpha OS=Rattus norvegicus GN=Hexa PE=2 SV=1	14.0152	6	52	5	1	528	60.499	7.24	2500000	5900000	9600000	16000000	23000000	8700000	0.484	536.394	6	6000000	15900000	1	1	0.377358	-0.377358
D3ZRE7	Protein Swap70 OS=Rattus norvegicus GN=Swap70 PE=1 SV=1	6.66667	4	21	4	1	585	68.73	6.04	NA	8300000	6600000	6400000	7700000	45000000	0.248	75.3055	4	7450000	19700000	0.666667	1	0.378173	-0.378173
Q05982	Nucleoside diphosphate kinase A OS=Rattus norvegicus GN=Nme1 PE=1 SV=1	79.6053	10	338	5	1	152	17.182	6.33	14000000	7700000	25000000	39000000	43000000	41000000	9	6405.17	10	1.55667e+07	41000000	1	1	0.379675	-0.379675
P06762	Heme oxygenase 1 OS=Rattus norvegicus GN=Hmox1 PE=1 SV=1	32.872	5	16	5	1	289	32.985	6.54	NA	NA	2000000	NA	5700000	4800000	1.081	159.922	5	2000000	5250000	0.333333	0.666667	0.380952	-0.380952
Q56A27	Nuclear cap-binding protein subunit 1 OS=Rattus norvegicus GN=Ncbp1 PE=1 SV=1	10	6	41	6	1	790	91.852	6.64	1400000	NA	3200000	2300000	9300000	6500000	0.341	484.873	6	2300000	6.03333e+06	0.666667	1	0.381215	-0.381215
O08628	Procollagen C-endopeptidase enhancer 1 OS=Rattus norvegicus GN=Pcolce PE=1 SV=1	2.77778	1	7	1	1	468	50.153	8.06	NA	4200000	NA	NA	11000000	NA	0.166	139.538	1	4200000	11000000	0.333333	0.333333	0.381818	-0.381818
F1LPK5	Acidic mammalian chitinase OS=Rattus norvegicus GN=Chia PE=3 SV=3	44.3836	11	210	11	1	365	39.85	4.77	36000000	34000000	66000000	96000000	110000000	150000000	5.158	2592.83	11	4.53333e+07	1.18667e+08	1	1	0.382022	-0.382022
Q6P503	ATPase, H+ transporting, V1 subunit D, isoform CRA_c OS=Rattus norvegicus GN=Atp6v1d PE=1 SV=1	10.9312	2	10	2	1	247	28.291	9.45	NA	1800000	NA	NA	4200000	5200000	0.212	196.679	2	1800000	4700000	0.333333	0.666667	0.382979	-0.382979
Q499V0	COMM domain containing 7 OS=Rattus norvegicus GN=Commd7 PE=1 SV=1	24.5	4	15	4	1	200	22.581	6.33	2000000	2200000	6300000	NA	9100000	NA	0.848	23.2	4	3500000	9100000	1	0.333333	0.384615	-0.384615
D3ZM33	Protein LOC100362298 OS=Rattus norvegicus GN=LOC100362298 PE=3 SV=3	43.4211	8	125	8	1	152	17.788	10.99	25000000	13000000	60000000	78000000	90000000	85000000	2.162	2372.66	8	3.26667e+07	8.43333e+07	1	1	0.387352	-0.387352
P0C5H9	Mesencephalic astrocyte-derived neurotrophic factor OS=Rattus norvegicus GN=Manf PE=1 SV=1	45.8101	8	65	8	1	179	20.375	8.25	NA	13000000	18000000	61000000	30000000	29000000	2.162	247.889	8	15500000	40000000	0.666667	1	0.3875	-0.3875
D3ZZR9	Peptidyl-prolyl cis-trans isomerase OS=Rattus norvegicus GN=Fkbp2 PE=1 SV=1	63.5714	7	83	7	1	140	15.378	8.88	3100000	15000000	35000000	41000000	49000000	47000000	6.743	1359.33	7	17700000	4.56667e+07	1	1	0.387591	-0.387591
Q5PPG2	Legumain OS=Rattus norvegicus GN=Lgmn PE=1 SV=1	14.9425	4	68	4	1	435	49.448	6.58	13000000	17000000	34000000	41000000	62000000	61000000	0.682	1444.51	4	2.13333e+07	5.46667e+07	1	1	0.390244	-0.390244
B0K008	Eukaryotic translation initiation factor 1 OS=Rattus norvegicus GN=Eif1 PE=1 SV=1	64.6018	6	70	6	1	113	12.739	7.44	3600000	3500000	11000000	15000000	14000000	17000000	6.499	1935.6	6	6.03333e+06	1.53333e+07	1	1	0.393478	-0.393478
P22509	rRNA 2'-O-methyltransferase fibrillarin OS=Rattus norvegicus GN=Fbl PE=1 SV=2	22.63	6	64	6	1	327	34.201	10.24	5000000	6300000	8500000	21000000	9600000	19000000	0.978	553.63	6	6600000	1.65333e+07	1	1	0.399194	-0.399194
G3V7V6	All-trans-13,14-dihydroretinol saturase, isoform CRA_b OS=Rattus norvegicus GN=Retsat PE=1 SV=1	11.6585	5	21	5	1	609	67.434	8.81	6400000	3900000	7700000	NA	15000000	NA	0.315	509.481	5	6000000	15000000	1	0.333333	0.4	-0.4
D4A510	Protein Smarcc2 OS=Rattus norvegicus GN=Smarcc2 PE=1 SV=3	14.185	14	141	7	1	1135	124.661	5.44	6800000	8200000	6400000	24000000	5300000	24000000	0.614	1703.67	14	7.13333e+06	1.77667e+07	1	1	0.401501	-0.401501
Q5M9H2	Acyl-Coenzyme A dehydrogenase, very long chain OS=Rattus norvegicus GN=Acadvl PE=1 SV=1	45.1908	23	245	23	1	655	70.777	8.81	19000000	35000000	38000000	160000000	33000000	36000000	2.094	2317.22	23	3.06667e+07	7.63333e+07	1	1	0.401747	-0.401747
P04638	Apolipoprotein A-II OS=Rattus norvegicus GN=Apoa2 PE=2 SV=1	30.3922	3	26	3	1	102	11.432	6.65	NA	4200000	NA	6900000	15000000	9300000	1.371	323.752	3	4200000	10400000	0.333333	1	0.403846	-0.403846
Q63691	Monocyte differentiation antigen CD14 OS=Rattus norvegicus GN=Cd14 PE=2 SV=2	20.9677	6	55	6	1	372	40.029	5.52	14000000	7000000	15000000	37000000	27000000	25000000	1.069	1841.07	6	12000000	2.96667e+07	1	1	0.404494	-0.404494
P17425	Hydroxymethylglutaryl-CoA synthase, cytoplasmic OS=Rattus norvegicus GN=Hmgcs1 PE=1 SV=1	3.65385	2	13	2	1	520	57.397	5.88	NA	3400000	NA	9000000	11000000	5200000	0.141	197.326	2	3400000	8400000	0.333333	1	0.404762	-0.404762
P62832	60S ribosomal protein L23 OS=Rattus norvegicus GN=Rpl23 PE=2 SV=1	37.8571	4	74	4	1	140	14.856	10.51	NA	11000000	19000000	26000000	52000000	32000000	1.848	1070.3	4	15000000	3.66667e+07	0.666667	1	0.409091	-0.409091
Q91V33	KH domain-containing, RNA-binding, signal transduction-associated protein 1 OS=Rattus norvegicus GN=Khdrbs1 PE=1 SV=1	15.5756	6	80	6	1	443	48.285	8.72	9700000	11000000	23000000	23000000	38000000	45000000	0.751	550.179	6	1.45667e+07	3.53333e+07	1	1	0.412264	-0.412264
D4AEK9	Protein Ccdc6 OS=Rattus norvegicus GN=Ccdc6 PE=1 SV=3	3.61702	2	5	2	1	470	52.941	7.34	NA	5000000	NA	NA	NA	12000000	0.16	53.8921	2	5000000	12000000	0.333333	0.333333	0.416667	-0.416667
Q6PDV7	60S ribosomal protein L10 OS=Rattus norvegicus GN=Rpl10 PE=1 SV=3	48.1308	9	108	9	1	214	24.588	10.08	6900000	22000000	35000000	43000000	54000000	56000000	1.873	883.288	9	21300000	51000000	1	1	0.417647	-0.417647
Q6AYQ9	Peptidyl-prolyl cis-trans isomerase OS=Rattus norvegicus GN=Ppic PE=1 SV=1	8.49057	2	38	2	1	212	22.995	8.13	4600000	NA	5600000	8400000	13000000	15000000	0.311	534.119	2	5100000	1.21333e+07	0.666667	1	0.42033	-0.42033
P07895	Superoxide dismutase [Mn], mitochondrial OS=Rattus norvegicus GN=Sod2 PE=1 SV=2	51.3514	9	470	9	1	222	24.659	8.81	140000000	130000000	270000000	380000000	420000000	480000000	9	7439.81	9	180000000	4.26667e+08	1	1	0.421875	-0.421875
A0A0H2UHX3	40S ribosomal protein S4 OS=Rattus norvegicus GN=Rps4x PE=1 SV=1	45.1724	13	299	13	1	290	32.467	10.07	15000000	24000000	82000000	100000000	76000000	110000000	2.857	3474.49	13	4.03333e+07	9.53333e+07	1	1	0.423077	-0.423077
A0A0G2K199	Leprecan 1, isoform CRA_c OS=Rattus norvegicus GN=P3h1 PE=1 SV=1	1.75913	1	11	1	1	739	83.461	5.21	3100000	NA	NA	6700000	8800000	6400000	0.047	210.308	1	3100000	7300000	0.333333	1	0.424658	-0.424658
D3ZQI1	Glutathione peroxidase OS=Rattus norvegicus GN=Gpx7 PE=1 SV=1	38.7097	5	48	5	1	186	21.076	7.85	5800000	9000000	8400000	18000000	23000000	13000000	1.929	683.441	5	7.73333e+06	18000000	1	1	0.42963	-0.42963
G3V6C4	UDP-glucose 6-dehydrogenase OS=Rattus norvegicus GN=Ugdh PE=1 SV=1	29.4118	10	44	10	1	493	54.852	7.34	NA	NA	4900000	11000000	11000000	12000000	0.778	599.963	10	4900000	1.13333e+07	0.333333	1	0.432353	-0.432353
D4A488	Elastase 2, neutrophil (Predicted) OS=Rattus norvegicus GN=Elane PE=1 SV=1	28.4133	8	100	8	1	271	29.538	9.28	16000000	31000000	24000000	55000000	34000000	75000000	6.017	2366.07	8	2.36667e+07	5.46667e+07	1	1	0.432927	-0.432927
P07340	Sodium/potassium-transporting ATPase subunit beta-1 OS=Rattus norvegicus GN=Atp1b1 PE=1 SV=1	23.3553	7	106	7	1	304	35.179	8.65	22000000	20000000	36000000	55000000	61000000	64000000	0.859	1459.86	7	26000000	60000000	1	1	0.433333	-0.433333
Q5BJP4	Protein LOC100910882 OS=Rattus norvegicus GN=Rbm39 PE=1 SV=1	29.0076	11	94	11	1	524	58.647	10.13	4600000	5600000	13000000	17000000	16000000	19000000	1.202	2021.11	11	7.73333e+06	1.73333e+07	1	1	0.446154	-0.446154
P17077	60S ribosomal protein L9 OS=Rattus norvegicus GN=Rpl9 PE=1 SV=1	46.3542	7	115	7	1	192	21.88	9.95	5100000	58000000	62000000	76000000	94000000	110000000	3.394	2091.41	7	41700000	9.33333e+07	1	1	0.446786	-0.446786
D3ZCH6	Protein Rnaset2 OS=Rattus norvegicus GN=Rnaset2 PE=1 SV=1	21.875	4	61	4	1	256	29.497	6.44	2800000	6100000	7100000	9800000	13000000	13000000	1.154	1338.43	4	5.33333e+06	1.19333e+07	1	1	0.446927	-0.446927
Q6P7C7	Transmembrane glycoprotein NMB OS=Rattus norvegicus GN=Gpnmb PE=2 SV=1	1.22378	1	35	1	1	572	63.691	7.11	23000000	18000000	79000000	69000000	89000000	110000000	0.08	102.997	1	40000000	8.93333e+07	1	1	0.447761	-0.447761
Q6AYI5	Leucine-rich repeat protein SHOC-2 OS=Rattus norvegicus GN=Shoc2 PE=2 SV=1	3.78007	2	10	2	1	582	64.881	8.46	NA	4500000	NA	9000000	11000000	NA	0.129	248.371	2	4500000	10000000	0.333333	0.666667	0.45	-0.45
D3ZUN5	Protein O-fucosyltransferase 2 (Predicted), isoform CRA_a OS=Rattus norvegicus GN=Pofut2 PE=1 SV=1	4.4289	2	18	2	1	429	49.512	6.38	3000000	NA	NA	6300000	7900000	5800000	0.129	241.798	2	3000000	6.66667e+06	0.333333	1	0.45	-0.45
F1LMY4	Ryanodine receptor 1 OS=Rattus norvegicus GN=Ryr1 PE=1 SV=1	1.13208	2	23	2	1	5035	565.122	5.3	NA	5400000	NA	NA	NA	12000000	0.014	0	2	5400000	12000000	0.333333	0.333333	0.45	-0.45
A0A0G2K2V6	Keratin, type I cytoskeletal 10 OS=Rattus norvegicus GN=Krt10 PE=1 SV=1	13.7746	11	166	9	1	559	56.779	5.11	85000000	49000000	43000000	23000000	27000000	340000000	1.738	3488.75	11	59000000	130000000	1	1	0.453846	-0.453846
Q6P7Q1	BRCA1-A complex subunit BRE OS=Rattus norvegicus GN=Bre PE=1 SV=1	13.3159	4	36	4	1	383	43.531	5.94	5400000	7400000	3800000	7300000	NA	17000000	0.616	292.168	4	5.53333e+06	12150000	1	0.666667	0.455418	-0.455418
Q7TP61	Ab2-076 OS=Rattus norvegicus GN=Acat2 PE=2 SV=1	19.4185	11	96	11	1	963	103.244	6.54	13000000	10000000	19000000	29000000	36000000	27000000	0.662	1619.8	11	14000000	3.06667e+07	1	1	0.456522	-0.456522
D3ZAR1	Protein Ldlrap1 OS=Rattus norvegicus GN=Ldlrap1 PE=1 SV=2	7.51634	2	21	2	1	306	33.764	7.36	NA	6000000	15000000	21000000	25000000	NA	0.202	184.242	2	10500000	23000000	0.666667	0.666667	0.456522	-0.456522
Q5U2V4	Phospholipase B-like 1 OS=Rattus norvegicus GN=Plbd1 PE=2 SV=1	27.6364	12	128	12	1	550	62.987	8.6	14000000	11000000	47000000	47000000	30000000	80000000	1.154	2627.54	12	24000000	5.23333e+07	1	1	0.458599	-0.458599
P45592	Cofilin-1 OS=Rattus norvegicus GN=Cfl1 PE=1 SV=3	78.9157	15	737	12	1	166	18.521	8.09	170000000	360000000	470000000	710000000	770000000	700000000	53.117	16003.1	15	3.33333e+08	7.26667e+08	1	1	0.458716	-0.458716
Q63581	Rat T-kininogen (T-KG) OS=Rattus norvegicus PE=4 SV=1	41.8605	16	626	5	0	430	47.588	6.52	96000000	98000000	110000000	260000000	260000000	130000000	11.69	14597.9	16	1.01333e+08	2.16667e+08	1	1	0.467692	-0.467692
A0A0G2K1A2	Protein Mpo OS=Rattus norvegicus GN=Mpo PE=1 SV=1	44.7075	28	454	25	1	718	80.832	9.52	42000000	43000000	46000000	79000000	70000000	130000000	2.609	7753.47	28	4.36667e+07	93000000	1	1	0.469534	-0.469534
D4AAM0	Protein Tnpo3 OS=Rattus norvegicus GN=Tnpo3 PE=1 SV=2	6.06717	5	12	5	1	923	104.117	5.52	2600000	NA	NA	4000000	6900000	5700000	0.212	75.864	5	2600000	5.53333e+06	0.333333	1	0.46988	-0.46988
G3V9Q7	Cathepsin G OS=Rattus norvegicus GN=Ctsg PE=1 SV=1	56	11	164	11	1	250	27.786	10.54	13000000	21000000	20000000	33000000	28000000	53000000	14.849	3668	11	18000000	38000000	1	1	0.473684	-0.473684
Q63400	Claudin-3 OS=Rattus norvegicus GN=Cldn3 PE=1 SV=2	11.8721	2	17	2	1	219	23.299	7.77	NA	4200000	3900000	8600000	8100000	8900000	0.585	166.582	2	4050000	8.53333e+06	0.666667	1	0.474609	-0.474609
O35303	Dynamin-1-like protein OS=Rattus norvegicus GN=Dnm1l PE=1 SV=1	24.7682	14	101	14	1	755	83.856	7.08	3500000	10000000	7400000	14000000	13000000	17000000	0.642	1339.46	14	6.96667e+06	1.46667e+07	1	1	0.475	-0.475
P20417	Tyrosine-protein phosphatase non-receptor type 1 OS=Rattus norvegicus GN=Ptpn1 PE=1 SV=1	21.0648	8	30	8	1	432	49.643	6.16	5100000	NA	NA	9200000	10000000	13000000	0.778	340.293	8	5100000	1.07333e+07	0.333333	1	0.475155	-0.475155
D3ZIE9	Protein Aldh18a1 OS=Rattus norvegicus GN=Aldh18a1 PE=3 SV=1	3.6478	3	16	3	1	795	87.275	7.56	NA	NA	1700000	2800000	5300000	2600000	0.122	367.652	3	1700000	3.56667e+06	0.333333	1	0.476636	-0.476636
P55314	Complement component C8 beta chain OS=Rattus norvegicus GN=C8b PE=2 SV=2	24.618	11	36	11	1	589	66.623	8.05	2100000	NA	6900000	9700000	15000000	3600000	0.778	421.055	11	4500000	9.43333e+06	0.666667	1	0.477032	-0.477032
M0R665	Uncharacterized protein OS=Rattus norvegicus PE=4 SV=1	12.1795	2	21	2	1	156	17.335	11.69	10000000	NA	5600000	12000000	20000000	17000000	0.438	53.1372	2	7800000	1.63333e+07	0.666667	1	0.477551	-0.477551
Q6IN22	Cathepsin B OS=Rattus norvegicus GN=Ctsb PE=1 SV=1	39.233	12	342	12	1	339	37.52	5.76	43000000	51000000	88000000	110000000	120000000	150000000	13.125	10172.1	12	6.06667e+07	1.26667e+08	1	1	0.478947	-0.478947
Q7TP05	Da1-24 OS=Rattus norvegicus GN=Cfb PE=1 SV=1	36.2903	35	522	35	0	1116	123.96	7.11	55000000	50000000	77000000	140000000	110000000	130000000	3.187	8693.1	35	6.06667e+07	1.26667e+08	1	1	0.478947	-0.478947
B2GV31	Muc1 protein OS=Rattus norvegicus GN=Muc1 PE=2 SV=1	7.0229	4	67	4	1	655	66.038	5.27	35000000	34000000	46000000	69000000	87000000	84000000	1.031	1769.55	4	3.83333e+07	80000000	1	1	0.479167	-0.479167
A0A0G2JT06	COP9 signalosome complex subunit 1 OS=Rattus norvegicus GN=Gps1 PE=1 SV=1	15.5894	8	61	8	1	526	58.84	6.74	12000000	15000000	13000000	17000000	9400000	57000000	0.492	602.086	8	1.33333e+07	27800000	1	1	0.479616	-0.479616
P08932	T-kininogen 2 OS=Rattus norvegicus PE=1 SV=2	65.814	23	798	8	1	430	47.673	6.35	53000000	45000000	49000000	120000000	140000000	46000000	28.427	16310.3	23	49000000	102000000	1	1	0.480392	-0.480392
A0A0G2JYE0	Protein Atxn2l OS=Rattus norvegicus GN=Atxn2l PE=1 SV=1	6.7718	7	61	7	1	1078	113.507	8.81	4100000	7500000	10000000	26000000	10000000	8900000	0.314	489.549	7	7200000	1.49667e+07	1	1	0.481069	-0.481069
F1LZX7	60S ribosomal protein L17 OS=Rattus norvegicus GN=Rpl17 PE=1 SV=2	26.4706	5	87	4	1	204	23.5	10.17	18000000	25000000	28000000	54000000	30000000	63000000	1.154	872.08	5	2.36667e+07	49000000	1	1	0.482993	-0.482993
G3V8S9	Cathelicidin antimicrobial peptide OS=Rattus norvegicus GN=Camp PE=1 SV=1	42.2857	4	38	1	1	175	19.743	8.13	2800000	5900000	NA	NA	NA	9000000	1.054	2042.56	4	4350000	9000000	0.666667	0.333333	0.483333	-0.483333
F1M861	Uncharacterized protein OS=Rattus norvegicus GN=Stfa2l2 PE=4 SV=3	49.5146	5	32	1	1	103	11.703	5.5	7300000	NA	NA	NA	NA	15000000	4.012	539.056	5	7300000	15000000	0.333333	0.333333	0.486667	-0.486667
Q6AYC4	Macrophage-capping protein OS=Rattus norvegicus GN=Capg PE=1 SV=1	55.3009	12	288	12	1	349	38.775	6.55	62000000	46000000	150000000	150000000	190000000	190000000	5.062	5476.74	12	86000000	1.76667e+08	1	1	0.486792	-0.486792
Q5XI81	Fragile X mental retardation syndrome-related protein 1 OS=Rattus norvegicus GN=Fxr1 PE=1 SV=1	6.8662	4	40	3	1	568	63.908	6.39	1700000	2500000	9000000	2300000	17000000	7800000	0.227	573.402	4	4400000	9.03333e+06	1	1	0.487085	-0.487085
Q68FX4	Hematopoietic cell specific Lyn substrate 1 OS=Rattus norvegicus GN=Hcls1 PE=1 SV=1	19.7479	8	87	8	1	476	52.791	4.94	8400000	6500000	16000000	22000000	18000000	23000000	0.84	785.233	8	10300000	21000000	1	1	0.490476	-0.490476
D4ACJ1	40S ribosomal protein S24 OS=Rattus norvegicus GN=LOC100363469 PE=3 SV=1	33.0827	5	46	5	1	133	15.385	10.7	NA	9800000	5900000	11000000	15000000	22000000	1.894	406.144	5	7850000	16000000	0.666667	1	0.490625	-0.490625
P62755	40S ribosomal protein S6 OS=Rattus norvegicus GN=Rps6 PE=1 SV=1	22.0884	5	127	5	1	249	28.663	10.84	40000000	38000000	80000000	100000000	120000000	100000000	0.668	3765.68	5	5.26667e+07	1.06667e+08	1	1	0.49375	-0.49375
D4A7R0	Signal recognition particle subunit SRP72 OS=Rattus norvegicus GN=Srp72 PE=1 SV=2	23.4328	13	83	9	1	670	74.606	9.17	4700000	4400000	9500000	11000000	9500000	17000000	0.759	430.853	13	6200000	12500000	1	1	0.496	-0.496
A0A0H2UHN2	Isopentenyl-diphosphate Delta-isomerase 1 OS=Rattus norvegicus GN=Idi1 PE=1 SV=1	27.5618	6	26	6	1	283	32.482	6.62	NA	NA	4700000	10000000	9100000	9300000	0.905	189.559	6	4700000	9.46667e+06	0.333333	1	0.496479	-0.496479
M0R3V4	Protein Mydgf OS=Rattus norvegicus GN=Mydgf PE=1 SV=2	21.0843	3	43	3	1	166	17.941	6.16	19000000	6100000	20000000	29000000	44000000	31000000	1.154	383.915	3	1.50333e+07	3.46667e+07	1	1	0.433654	-0.733654
Q8K597	Protein Prtn3 OS=Rattus norvegicus GN=Prtn3 PE=4 SV=1	41.7323	6	89	6	1	254	27.664	7.97	3500000	13000000	10000000	17000000	23000000	21000000	3.642	1680.45	6	8.83333e+06	2.03333e+07	1	1	0.434426	-0.734426
P14740	Dipeptidyl peptidase 4 OS=Rattus norvegicus GN=Dpp4 PE=1 SV=2	40.678	33	1021	2	1	767	88.033	6.35	9300000	NA	NA	27000000	19000000	18000000	5.861	15415.4	33	9300000	2.13333e+07	0.333333	1	0.435937	-0.735938
Q9Z2Z8	7-dehydrocholesterol reductase OS=Rattus norvegicus GN=Dhcr7 PE=2 SV=1	10.828	5	25	5	1	471	54.119	8.35	2700000	NA	4200000	6600000	9800000	7300000	0.616	510.836	5	3450000	7900000	0.666667	1	0.436709	-0.736709
P19944	60S acidic ribosomal protein P1 OS=Rattus norvegicus GN=Rplp1 PE=3 SV=1	57.0175	3	83	3	1	114	11.491	4.32	120000000	37000000	150000000	180000000	240000000	280000000	9	1032.63	3	1.02333e+08	2.33333e+08	1	1	0.438571	-0.738571
Q2I6B4	V-type proton ATPase subunit a OS=Rattus norvegicus GN=Atp6v0a1 PE=2 SV=1	5.68047	5	17	5	1	845	97.037	6.54	8400000	NA	NA	20000000	18000000	NA	0.265	257.457	5	8400000	19000000	0.333333	0.666667	0.442105	-0.742105
A0A0G2KB92	Serine/threonine-protein kinase DCLK1 OS=Rattus norvegicus GN=Dclk1 PE=1 SV=1	3.29218	2	18	2	1	729	80.953	8.73	NA	1900000	2400000	4400000	5600000	4500000	0.094	469.566	2	2150000	4.83333e+06	0.666667	1	0.444828	-0.744828
P13668	Stathmin OS=Rattus norvegicus GN=Stmn1 PE=1 SV=2	40.2685	6	73	6	1	149	17.278	5.97	38000000	31000000	35000000	60000000	91000000	75000000	1.254	1441.55	6	3.46667e+07	7.53333e+07	1	1	0.460177	-0.860177
Q32PZ7	Srp72 protein (Fragment) OS=Rattus norvegicus GN=Srp72 PE=2 SV=1	24.3038	6	42	2	1	395	43.793	9.85	NA	2000000	NA	NA	NA	4300000	0.562	221.972	6	2000000	4300000	0.333333	0.333333	0.465116	-0.865116
M0R6L4	40S ribosomal protein S3a OS=Rattus norvegicus GN=LOC100365839 PE=3 SV=1	52.2727	14	319	14	1	264	29.889	9.73	66000000	56000000	120000000	160000000	180000000	180000000	4.055	6412.6	14	8.06667e+07	1.73333e+08	1	1	0.465385	-0.865385
P42533	Tissue factor OS=Rattus norvegicus GN=F3 PE=2 SV=1	18.6441	5	32	5	1	295	33.423	9.8	5600000	6200000	NA	11000000	14000000	13000000	0.738	853.889	5	5900000	1.26667e+07	0.666667	1	0.465789	-0.865789
F7EZZ0	Disks large-associated protein 3 OS=Rattus norvegicus GN=Dap3 PE=1 SV=1	3.0303	1	9	1	1	396	45.083	9.1	NA	3300000	1700000	4700000	6000000	5400000	0.068	93.5268	1	2500000	5.36667e+06	0.666667	1	0.465839	-0.865839
P55009	Allograft inflammatory factor 1 OS=Rattus norvegicus GN=Aif1 PE=2 SV=1	23.8095	3	34	3	1	147	16.817	8.27	NA	NA	7300000	11000000	19000000	17000000	0.468	1038.41	3	7300000	1.56667e+07	0.333333	1	0.465957	-0.865957
Q5PQU1	Kininogen 1 OS=Rattus norvegicus GN=Kng1 PE=2 SV=1	49.7674	18	716	7	1	430	47.734	6.74	96000000	98000000	110000000	260000000	260000000	130000000	25.827	15634.9	18	1.01333e+08	2.16667e+08	1	1	0.467692	-0.867692
F1LRB8	S-adenosylmethionine synthase OS=Rattus norvegicus GN=Mat2a PE=1 SV=2	33.4177	10	141	10	1	395	43.647	6.37	9000000	16000000	13000000	25000000	23000000	28000000	1.31	2514.88	10	1.26667e+07	2.53333e+07	1	1	0.5	-0.977358
A0A0G2JYG9	60S ribosomal protein L13 OS=Rattus norvegicus PE=3 SV=1	18.3168	4	77	3	0	202	23.063	11	16000000	20000000	50000000	50000000	66000000	56000000	0.551	1549.36	4	2.86667e+07	5.73333e+07	1	1	0.5	-0.978173
P62912	60S ribosomal protein L32 OS=Rattus norvegicus GN=Rpl32 PE=1 SV=2	22.2222	3	39	3	1	135	15.85	11.33	30000000	39000000	50000000	76000000	79000000	83000000	1.154	1208.07	3	3.96667e+07	7.93333e+07	1	1	0.5	-0.979675
Q6IN37	GM2 ganglioside activator OS=Rattus norvegicus GN=Gm2a PE=1 SV=1	28.6432	5	83	5	1	199	21.479	6.52	29000000	34000000	74000000	66000000	98000000	110000000	2.162	920.35	5	4.56667e+07	9.13333e+07	1	1	0.5	-0.980952
Q6P685	Eukaryotic translation initiation factor 2, subunit 2 (Beta) OS=Rattus norvegicus GN=Eif2s2 PE=1 SV=1	24.6246	8	100	8	1	333	38.219	5.8	6500000	7500000	15000000	18000000	22000000	18000000	1.219	893.115	8	9.66667e+06	1.93333e+07	1	1	0.5	-0.981215
O88514	Beta-defensin 4 OS=Rattus norvegicus GN=Defb4 PE=2 SV=1	34.9206	2	47	2	1	63	6.942	9.61	84000000	51000000	150000000	200000000	190000000	180000000	3.642	787.971	2	95000000	190000000	1	1	0.5	-0.981818
O35254	Golgi reassembly-stacking protein 1 OS=Rattus norvegicus GN=Gorasp1 PE=1 SV=4	4.87805	2	23	2	1	451	47.643	4.65	NA	NA	2800000	NA	7900000	3300000	0.425	229.773	2	2800000	5600000	0.333333	0.666667	0.5	-0.982022
D2XV59	GTP-binding protein 1 OS=Rattus norvegicus GN=Gtpbp1 PE=1 SV=1	7.17489	4	14	4	1	669	72.443	8.34	2800000	NA	NA	NA	6400000	4800000	0.198	124.141	4	2800000	5600000	0.333333	0.666667	0.5	-0.987085
F1LZH0	Protein LOC100912707 OS=Rattus norvegicus GN=LOC100912707 PE=1 SV=2	17.8862	2	15	2	1	123	13.602	7.99	14000000	NA	NA	NA	28000000	NA	0.585	187.358	2	14000000	28000000	0.333333	0.333333	0.5	-0.990476

## Sheet: ALI-D7 vs Sham-D7
Accession	Description	Coverage	# Peptides	# PSMs	# Unique Peptides	# Protein Groups	# AAs	MW [kDa]	calc. pI	36p	25p	38p	37p	35p	32p	emPAI	Score Mascot	# Peptides Mascot	Group_ALI_D7.average	Group_Sham_D7.average	Group_ALI_D7.call.percent	Group_Sham_D7.call.percent	Group_ALI_D7.vs.Group_Sham_D7.FC
Q99N97	H-caldesmon (Fragment) OS=Rattus norvegicus GN=Cald1 PE=2 SV=1	14.5374	4	24	4	1	227	26.621	4.98	NA	6200000	320000000	NA	1600000	NA	0.557	563.797	4	163100000	1600000	0.666667	0.333333	11.9375	0.998954
Q5UT80	MHC class II antigen OS=Rattus norvegicus GN=BA1 PE=2 SV=1	37.5	6	85	3	1	256	28.35	5.01	160000000	150000000	6600000	5200000	NA	NA	2.415	936.886	6	1.05533e+08	5200000	1	0.333333	10.2949	0.861496
B0BN23	Tetraspanin OS=Rattus norvegicus GN=Tspan15 PE=2 SV=1	7.48299	2	20	2	1	294	32.851	5.68	6500000	10000000	NA	NA	750000	NA	0.468	470.431	2	8250000	750000	0.666667	0.333333	10	0.83682
Q6P6R6	Transglutaminase 2, C polypeptide OS=Rattus norvegicus GN=Tgm2 PE=2 SV=1	59.9125	35	1443	1	1	686	76.887	5.07	130000000	NA	NA	13000000	NA	NA	10.007	36851	35	130000000	13000000	0.333333	0.333333	10	0.83682
P05545	Serine protease inhibitor A3K OS=Rattus norvegicus GN=Serpina3k PE=1 SV=3	42.3077	16	421	2	1	416	46.532	5.44	NA	160000000	120000000	13000000	NA	NA	5.813	7201.39	16	140000000	13000000	0.666667	0.333333	9.76923	0.817509
A0A0G2K2Z0	Protein Eml4 OS=Rattus norvegicus GN=Eml4 PE=1 SV=1	19.6937	15	165	14	1	914	101.834	6.92	4700000	72000000	5300000	2700000	2900000	3300000	0.749	2120.39	15	2.73333e+07	2.96667e+06	1	1	9.21348	0.771003
D4A033	Cyclin-dependent kinase 2-associated protein OS=Rattus norvegicus GN=Cdk2ap2 PE=1 SV=1	14.1732	2	9	2	1	127	13.194	9.48	35000000	NA	NA	NA	NA	4000000	1.512	29.59	2	35000000	4000000	0.333333	0.333333	8.75	0.732218
D3ZJ08	Histone H3 OS=Rattus norvegicus GN=Hist2h3c2 PE=1 SV=1	18.3824	3	241	3	1	136	15.379	11.27	2300000000	1500000000	750000000	140000000	120000000	350000000	1.031	3669.13	3	1.51667e+09	2.03333e+08	1	1	7.45902	0.624185
D3ZRN3	Connective tissue growth factor OS=Rattus norvegicus PE=1 SV=1	24.2021	10	1555	3	1	376	41.936	5.49	140000000	4400000000	130000000	130000000	170000000	150000000	2.455	9642.24	22	12000000	1800000	0.333333	0.333333	6.66667	0.55788
Q499V0	COMM domain containing 7 OS=Rattus norvegicus GN=Commd7 PE=1 SV=1	24.5	4	15	4	1	200	22.581	6.33	NA	NA	11000000	NA	NA	1700000	0.848	23.2	4	11000000	1700000	0.333333	0.333333	6.47059	0.541472
Q5PQN0	Neurocalcin-delta OS=Rattus norvegicus GN=Ncald PE=1 SV=3	29.0155	7	115	2	1	193	22.231	5.35	20000000	5800000	20000000	2600000	2500000	2300000	2.875	1170.93	7	1.52667e+07	2.46667e+06	1	1	6.18919	0.517924
Q6AYS8	Estradiol 17-beta-dehydrogenase 11 OS=Rattus norvegicus GN=Hsd17b11 PE=2 SV=1	26.1745	7	111	7	1	298	32.917	8.63	35000000	51000000	16000000	5100000	4200000	8200000	1.848	1564.39	7	34000000	5.83333e+06	1	1	5.82857	0.487747
D3ZCV0	Protein Actn2 OS=Rattus norvegicus GN=Actn2 PE=1 SV=1	43.2886	33	619	20	1	894	103.768	5.45	NA	58000000	NA	4600000	NA	NA	2.162	1254.87	3	5.53333e+07	9550000	1	0.666667	5.79407	0.484859
Q8VI32	Activated B cell RT1Bl alpha chain OS=Rattus norvegicus PE=2 SV=1	29.6875	4	36	2	1	256	28.456	4.94	NA	NA	15000000	NA	NA	2800000	0.848	248.121	4	15000000	2800000	0.333333	0.333333	5.35714	0.448296
Q63583	Hepatoma alpha tropomyosin OS=Rattus norvegicus PE=3 SV=1	67.2535	27	847	3	0	284	32.85	4.83	NA	NA	31000000	NA	6100000	NA	10.365	15043.5	27	31000000	6100000	0.333333	0.333333	5.08197	0.425269
B5DEZ8	Plexin domain containing 2 OS=Rattus norvegicus GN=Plxdc2 PE=1 SV=1	14.1509	6	83	6	1	530	59.379	6.62	17000000	30000000	10000000	1200000	6200000	4700000	0.84	2174.43	6	19000000	4.03333e+06	1	1	4.71074	0.394205
G3V667	Integrin, alpha 6, isoform CRA_a OS=Rattus norvegicus GN=Itga6 PE=1 SV=1	5.31221	5	36	5	1	1073	119.404	7.06	6100000	NA	NA	1200000	1400000	NA	0.145	583.295	5	6100000	1300000	0.333333	0.666667	4.69231	0.392662
G3V9S0	NADH-cytochrome b5 reductase OS=Rattus norvegicus GN=Cyb5r1 PE=1 SV=1	23.2787	6	24	6	1	305	34.211	8.84	29000000	NA	7000000	3500000	4000000	5200000	0.778	308.941	6	18000000	4.23333e+06	0.666667	1	4.25197	0.355813
B2GV28	Cyp2b1 protein OS=Rattus norvegicus GN=Cyp2b1 PE=1 SV=1	33.8086	18	442	18	1	491	55.854	7.64	50000000	120000000	87000000	10000000	33000000	19000000	2.793	8609.58	18	8.56667e+07	2.06667e+07	1	1	4.14516	0.346875
M0RD63	Protein Ranbp3 OS=Rattus norvegicus GN=Ranbp3 PE=1 SV=2	13.6445	7	32	7	1	557	59.112	4.97	3200000	14000000	NA	2100000	NA	NA	0.546	434.237	7	8600000	2100000	0.666667	0.333333	4.09524	0.342698
G3V7Z8	Poly(A) binding protein, nuclear 1, isoform CRA_a OS=Rattus norvegicus GN=Pabpn1 PE=1 SV=1	20.1987	4	41	4	1	302	32.291	5.17	41000000	32000000	26000000	9700000	5700000	9000000	0.585	1102.58	4	33000000	8.13333e+06	1	1	4.05738	0.339529
A0A0G2JTA1	Protein Ppp2r5e OS=Rattus norvegicus GN=Ppp2r5e PE=1 SV=1	11.9914	5	52	4	1	467	54.679	6.95	9500000	6400000	4500000	NA	1700000	NA	0.528	662.439	5	6800000	1700000	1	0.333333	4	0.334728
B5DEG1	Protein Itga8 OS=Rattus norvegicus GN=Itga8 PE=2 SV=1	14.9718	15	179	15	1	1062	117.5	5.53	22000000	24000000	21000000	NA	4600000	6700000	1.025	1823.97	15	2.23333e+07	5650000	1	0.666667	3.9528	0.330778
G3V9N0	Polyadenylate-binding protein OS=Rattus norvegicus GN=Pabpc4 PE=1 SV=2	15.3727	8	87	2	1	644	70.789	9.26	NA	5000000	28000000	NA	4500000	4100000	0.468	2021.59	8	16500000	4300000	0.666667	0.666667	3.83721	0.321105
Q5XIS9	Serine/threonine-protein kinase D2 OS=Rattus norvegicus GN=Prkd2 PE=1 SV=1	5.02857	4	21	4	1	875	96.436	6.86	2300000	4600000	19000000	NA	NA	2300000	0.175	97.4052	4	8.63333e+06	2300000	1	0.333333	3.75362	0.314111
A0A0G2K1G5	Transforming growth factor beta binding protein 2, isoform CRA_a OS=Rattus norvegicus GN=Ltbp2 PE=1 SV=1	7.80994	11	28	11	1	1831	196.993	5.29	NA	25000000	NA	9100000	1300000	6400000	0.484	454.375	6	28000000	7600000	0.333333	0.333333	3.68421	0.308302
F1M790	Prostaglandin F2 receptor negative regulator OS=Rattus norvegicus GN=Ptgfrn PE=1 SV=3	8.75995	6	44	6	1	879	98.607	6.61	8300000	8600000	NA	2300000	NA	NA	0.297	429.481	6	8450000	2300000	0.666667	0.333333	3.67391	0.30744
F1M6W2	Endoplasmic reticulum metallopeptidase 1 OS=Rattus norvegicus GN=Ermp1 PE=1 SV=1	12.6949	9	78	9	1	898	99.916	7.49	27000000	28000000	23000000	1400000	3900000	16000000	0.569	1176.68	9	26000000	7100000	1	1	3.66197	0.306441
Q641X3	Beta-hexosaminidase subunit alpha OS=Rattus norvegicus GN=Hexa PE=2 SV=1	14.0152	6	52	5	1	528	60.499	7.24	9800000	NA	24000000	3000000	6400000	4800000	0.484	536.394	6	16900000	4.73333e+06	0.666667	1	3.57042	0.29878
D3ZA31	Myotubularin related protein 2 (Predicted), isoform CRA_b OS=Rattus norvegicus GN=Mtmr2 PE=1 SV=1	2.64386	2	28	2	1	643	73.226	7.25	4800000	4000000	5100000	NA	1300000	NA	0.091	425.889	2	4.63333e+06	1300000	1	0.333333	3.5641	0.298251
B2B9A9	Ephrin B2 OS=Rattus norvegicus GN=Efnb2 PE=2 SV=1	10.7143	3	19	3	1	336	37.258	8.88	8900000	9600000	8100000	NA	1500000	3600000	0.334	286.328	3	8.86667e+06	2550000	1	0.666667	3.47712	0.290973
D3ZXE2	Sister chromatid cohesion protein PDS5 homolog B OS=Rattus norvegicus GN=Pds5b PE=1 SV=1	3.58621	4	18	4	1	1450	164.414	8.62	2200000	3700000	NA	860000	NA	NA	0.091	41.239	4	2950000	860000	0.666667	0.333333	3.43023	0.287049
Q642B4	C-type lectin domain family 14, member a OS=Rattus norvegicus GN=Clec14a PE=1 SV=1	26.0684	9	74	9	1	468	50.147	7.12	110000000	150000000	61000000	6300000	9300000	78000000	1.212	1362.8	9	107000000	31200000	1	1	3.42949	0.286986
P70583	Deoxyuridine 5'-triphosphate nucleotidohydrolase OS=Rattus norvegicus GN=Dut PE=2 SV=3	17.561	3	15	3	1	205	21.989	8.78	NA	7100000	NA	2100000	NA	NA	0.624	93.9013	3	7100000	2100000	0.333333	0.333333	3.38095	0.282925
Q9JMI1	Acetoacetyl-CoA synthetase OS=Rattus norvegicus GN=Aacs PE=1 SV=1	4.91071	2	11	2	1	672	74.992	6.49	NA	7600000	NA	NA	1900000	2700000	0.049	67.2265	2	7600000	2300000	0.333333	0.666667	3.30435	0.276514
Q63425	Periaxin OS=Rattus norvegicus GN=Prx PE=1 SV=2	39.5517	42	1036	3	1	1383	146.309	8.54	17000000	20000000	13000000	NA	5100000	NA	1.929	16572.1	42	1.66667e+07	5100000	1	0.333333	3.26797	0.273471
G3V615	Complement factor B, isoform CRA_b OS=Rattus norvegicus GN=Cfb PE=1 SV=1	49.1481	31	538	31	1	763	85.299	6.96	46000000	51000000	420000000	80000000	79000000	47000000	0.896	1841.63	4	2.36667e+07	7300000	1	0.666667	3.24201	0.271298
Q6IFZ5	Protein Krt76 OS=Rattus norvegicus GN=Krt76 PE=2 SV=1	8.77797	8	184	2	0	581	61.721	8.38	NA	35000000	12000000	4300000	9500000	8200000	0.554	1298.24	8	23500000	7.33333e+06	0.666667	1	3.20455	0.268163
Q5RKH2	Galactokinase 1 OS=Rattus norvegicus GN=Galk1 PE=1 SV=1	18.8776	8	50	8	1	392	42.349	5.35	NA	29000000	NA	7000000	8200000	12000000	1.371	748.094	8	29000000	9.06667e+06	0.333333	1	3.19853	0.267659
B3DM93	Programmed cell death 4 OS=Rattus norvegicus GN=Pdcd4 PE=2 SV=1	13.4328	5	33	5	1	469	51.704	5.16	13000000	16000000	16000000	4800000	NA	NA	0.354	64.4887	5	15000000	4800000	1	0.333333	3.125	0.261506
Q4KM24	Peroxisomal biogenesis factor 11 beta OS=Rattus norvegicus GN=Pex11b PE=1 SV=1	6.97674	2	9	2	1	258	28.624	9.79	NA	7400000	NA	NA	NA	2400000	0.245	28.01	2	7400000	2400000	0.333333	0.333333	3.08333	0.25802
A0A0G2K0Q8	Protein Susd2 OS=Rattus norvegicus GN=Susd2 PE=1 SV=1	30.9091	19	293	19	1	825	90.617	6.39	29000000	46000000	48000000	12000000	6200000	22000000	2.675	6753.04	19	41000000	13400000	1	1	3.0597	0.256042
Q5EB94	Myocardial zonula adherens protein OS=Rattus norvegicus GN=Myzap PE=1 SV=1	37.5536	15	145	15	1	466	53.922	6.6	16000000	15000000	13000000	3500000	6300000	4600000	1.424	3005.33	15	1.46667e+07	4800000	1	1	3.05556	0.255695
A0A0G2JWK2	Methyl-CpG-binding protein 2 OS=Rattus norvegicus GN=Mecp2 PE=1 SV=1	23.1707	10	123	10	1	492	53.016	9.96	28000000	22000000	15000000	8100000	7400000	5800000	0.962	1291.12	10	2.16667e+07	7100000	1	1	3.05164	0.255368
A0A0G2K824	Mannose-1-phosphate guanyltransferase alpha OS=Rattus norvegicus GN=Gmppa PE=1 SV=1	16.9412	6	32	6	1	425	46.619	7.39	NA	9800000	NA	3600000	2900000	NA	0.931	419.313	6	9800000	3250000	0.333333	0.666667	3.01538	0.252333
B1PLB1	CD34 antigen (Predicted) OS=Rattus norvegicus GN=Cd34 PE=1 SV=1	23.5751	7	169	7	1	386	41.213	5.49	90000000	110000000	59000000	27000000	39000000	20000000	2.384	2549.49	7	8.63333e+07	2.86667e+07	1	1	3.01163	0.252019
Q3B7D1	Ubiquitin-conjugating enzyme E2 Z OS=Rattus norvegicus GN=Ube2z PE=1 SV=2	14.3258	6	40	6	1	356	38.328	5.62	90000000	180000000	17000000	4700000	4600000	87000000	1.069	126.037	6	9.56667e+07	32100000	1	1	2.98027	0.249395
P19686	Guanylate cyclase soluble subunit alpha-3 OS=Rattus norvegicus GN=Gucy1a3 PE=1 SV=1	38.8406	22	284	22	1	690	77.517	7.06	17000000	22000000	22000000	5100000	9700000	5700000	2.495	3716.05	22	2.03333e+07	6.83333e+06	1	1	2.97561	0.249005
B2GV01	Metastasis-associated gene family, member 2 OS=Rattus norvegicus GN=Mta2 PE=1 SV=1	10.1796	6	79	6	1	668	74.913	9.67	10000000	14000000	12000000	4400000	2100000	5600000	0.264	1786.05	6	12000000	4.03333e+06	1	1	2.97521	0.248971
D3ZL10	Protein Col6a6 OS=Rattus norvegicus GN=Col6a6 PE=1 SV=3	23.4541	41	506	34	1	2264	246.641	6.71	24000000	25000000	22000000	5100000	7900000	11000000	1.083	8357.46	41	2.36667e+07	8000000	1	1	2.95833	0.247559
A0A0G2JXY9	Epsin-2 OS=Rattus norvegicus GN=Epn2 PE=1 SV=1	12.5828	6	58	6	1	604	64.619	8.24	4600000	7100000	5600000	NA	2700000	1200000	0.711	528.121	6	5.76667e+06	1950000	1	0.666667	2.95726	0.24747
A0A0A0MXX0	CD2-associated protein OS=Rattus norvegicus GN=Cd2ap PE=1 SV=2	11.46	7	76	7	1	637	70.448	6.38	9000000	12000000	5800000	2300000	2400000	4400000	0.372	730.486	7	8.93333e+06	3.03333e+06	1	1	2.94505	0.246448
P62762	Visinin-like protein 1 OS=Rattus norvegicus GN=Vsnl1 PE=1 SV=2	18.3246	3	24	3	1	191	22.128	5.15	5200000	NA	4800000	NA	NA	1700000	0.389	75.2136	3	5000000	1700000	0.666667	0.333333	2.94118	0.246124
D3ZD19	Extracellular link domain-containing 1 (Predicted) OS=Rattus norvegicus GN=Lyve1 PE=1 SV=1	12.828	4	80	4	1	343	37.244	7.72	14000000	30000000	27000000	7000000	8600000	8900000	0.492	2007.15	4	2.36667e+07	8.16667e+06	1	1	2.89796	0.242507
F1LPM4	Amine oxidase [flavin-containing] OS=Rattus norvegicus GN=Maob PE=1 SV=2	39.2308	18	273	14	1	520	58.421	8.21	29000000	44000000	28000000	12000000	11000000	12000000	2.665	3742.21	18	3.36667e+07	1.16667e+07	1	1	2.88571	0.241482
F1M957	von Willebrand factor OS=Rattus norvegicus GN=Vwf PE=1 SV=3	38.9403	77	1036	77	1	2812	308.774	5.57	48000000	51000000	48000000	13000000	24000000	14000000	2.572	21037.5	77	49000000	17000000	1	1	2.88235	0.241201
Q6AY97	Coiled-coil domain-containing protein 91 OS=Rattus norvegicus GN=Ccdc91 PE=1 SV=1	5.42986	2	13	2	1	442	50.135	5.07	3100000	3800000	NA	NA	1200000	NA	0.119	134.808	2	3450000	1200000	0.666667	0.333333	2.875	0.240586
P07861	Neprilysin OS=Rattus norvegicus GN=Mme PE=1 SV=2	24	15	180	15	1	750	85.741	6.01	21000000	22000000	17000000	5000000	10000000	5900000	1.037	2373.92	15	20000000	6.96667e+06	1	1	2.87081	0.240235
D3ZXA6	Protein Pdpr OS=Rattus norvegicus GN=Pdpr PE=1 SV=1	5.01139	4	40	4	1	878	98.756	6.48	110000000	7600000	NA	5700000	6900000	3700000	0.369	177.795	3	7750000	2700000	0.666667	0.666667	2.87037	0.240198
B5DFC3	Protein Sec23a OS=Rattus norvegicus GN=Sec23a PE=1 SV=1	27.451	16	159	14	1	765	86.106	7.08	14000000	43000000	22000000	8500000	11000000	8700000	1.099	2897.83	16	2.63333e+07	9400000	1	1	2.80142	0.234428
D4ACM8	Protein Fzd7 OS=Rattus norvegicus GN=Fzd7 PE=4 SV=1	1.3986	1	20	1	1	572	63.723	7.72	2500000	3200000	2700000	NA	NA	1000000	0.072	295.643	1	2800000	1000000	1	0.333333	2.8	0.23431
Q6PCU4	Emd protein OS=Rattus norvegicus GN=Emd PE=1 SV=1	45.3846	9	94	9	1	260	29.567	5.19	17000000	30000000	9300000	5900000	6600000	7700000	2.875	1032.44	9	1.87667e+07	6.73333e+06	1	1	2.78713	0.233233
Q6P792	Four and a half LIM domains 1 OS=Rattus norvegicus GN=Fhl1 PE=1 SV=1	62.1622	16	964	5	1	296	33.556	8.46	450000000	440000000	360000000	100000000	160000000	190000000	5.043	24192	16	4.16667e+08	150000000	1	1	2.77778	0.23245
D4A6C5	Protein Arhgap1 OS=Rattus norvegicus GN=Arhgap1 PE=1 SV=1	65.1481	24	512	23	1	439	50.591	6.54	67000000	190000000	73000000	39000000	39000000	41000000	7.161	7701.67	24	110000000	3.96667e+07	1	1	2.77311	0.232059
B0BNE7	Tetraspanin OS=Rattus norvegicus GN=Tspan7 PE=2 SV=1	6.0241	2	41	2	1	249	27.526	7.52	8500000	13000000	8700000	2900000	5300000	2700000	0.701	1892.04	2	1.00667e+07	3.63333e+06	1	1	2.77064	0.231853
P30083	Vasoactive intestinal polypeptide receptor 1 OS=Rattus norvegicus GN=Vipr1 PE=2 SV=1	10.4575	3	29	3	1	459	52.024	8.15	11000000	16000000	NA	3300000	5900000	5500000	0.292	372.881	3	13500000	4900000	0.666667	1	2.7551	0.230552
F1M392	Protein Limch1 OS=Rattus norvegicus GN=Limch1 PE=1 SV=2	46.7281	42	500	42	1	1085	121.425	5.63	41000000	45000000	43000000	17000000	16000000	14000000	2.332	9700.71	42	43000000	1.56667e+07	1	1	2.74468	0.22968
D3ZUP5	Protein Brk1 OS=Rattus norvegicus GN=Brk1 PE=1 SV=1	41.3333	3	25	3	1	75	8.755	5.45	14000000	25000000	9700000	NA	2000000	10000000	1.371	409.416	3	1.62333e+07	6000000	1	0.666667	2.70556	0.226406
A0A0G2K132	Protein Fmnl2 OS=Rattus norvegicus GN=Fmnl2 PE=1 SV=1	2.98651	3	20	1	1	1038	117.898	8.06	96000000	76000000	55000000	23000000	33000000	NA	0.086	36.51	3	7.56667e+07	28000000	1	0.666667	2.70238	0.226141
D3ZKP9	Voltage-dependent calcium channel subunit alpha-2/delta-1 OS=Rattus norvegicus GN=Cacna2d1 PE=1 SV=3	13.1868	12	120	12	1	1092	123.622	5.31	8800000	8500000	7400000	NA	3600000	2500000	0.432	986.783	12	8.23333e+06	3050000	1	0.666667	2.69945	0.225896
Q6AYU6	Aqp5 protein (Fragment) OS=Rattus norvegicus GN=Aqp5 PE=2 SV=1	14.0468	3	49	3	1	299	31.905	9.47	25000000	42000000	14000000	17000000	5600000	7600000	0.931	998.278	3	27000000	1.00667e+07	1	1	2.68212	0.224445
A0A0G2K9T4	Microtubule-actin cross-linking factor 1 OS=Rattus norvegicus GN=Macf1 PE=1 SV=1	35.2113	224	2456	56	1	7384	834.587	5.38	14000000	16000000	15000000	4500000	7200000	5100000	1.576	32661.6	224	15000000	5600000	1	1	2.67857	0.224148
Q5XIL4	Protein Sorbs3 OS=Rattus norvegicus GN=Sorbs3 PE=1 SV=1	32.7422	14	215	14	1	733	82.046	9.06	43000000	48000000	37000000	10000000	18000000	20000000	1.276	5272.98	14	4.26667e+07	16000000	1	1	2.66667	0.223152
D3ZV91	Protein L3hypdh OS=Rattus norvegicus GN=L3hypdh PE=1 SV=1	17.7966	5	39	5	1	354	37.89	6.52	6500000	6700000	4000000	NA	2100000	2200000	0.616	760.233	5	5.73333e+06	2150000	1	0.666667	2.66667	0.223152
M0R7U6	Protein Sowahc OS=Rattus norvegicus GN=Sowahc PE=1 SV=1	3.29457	1	13	1	1	516	55.067	6.9	NA	NA	3200000	NA	1200000	NA	0.066	360.817	1	3200000	1200000	0.333333	0.333333	2.66667	0.223152
A0A0G2K562	Disintegrin and metalloproteinase domain-containing protein 10 OS=Rattus norvegicus GN=Adam10 PE=1 SV=1	14.0187	9	127	9	1	749	84.033	7.77	16000000	24000000	17000000	7100000	7100000	7200000	0.544	2280.94	9	19000000	7.13333e+06	1	1	2.66355	0.222891
D3ZXP3	Histone H2A OS=Rattus norvegicus GN=H2afx PE=1 SV=1	37.7622	5	489	1	1	143	15.105	10.74	18000000	54000000	52000000	3100000	28000000	NA	2.162	8766.43	5	4.13333e+07	15550000	1	0.666667	2.65809	0.222434
A7BFV9	Epidermal growth factor receptor pathway substrate 15 OS=Rattus norvegicus PE=1 SV=1	19.5095	13	185	13	1	897	98.553	4.61	12000000	13000000	12000000	2500000	4400000	7200000	0.696	3314.1	13	1.23333e+07	4700000	1	1	2.62411	0.219591
Q66HA8	Heat shock protein 105 kDa OS=Rattus norvegicus GN=Hsph1 PE=1 SV=1	29.021	20	270	18	1	858	96.357	5.55	9800000	15000000	77000000	10000000	13000000	16000000	1.179	4679.06	20	3.39333e+07	13000000	1	1	2.61026	0.218431
P07483	Fatty acid-binding protein, heart OS=Rattus norvegicus GN=Fabp3 PE=1 SV=2	48.8722	6	45	6	1	133	14.766	6.33	NA	150000000	NA	16000000	7300000	NA	0.334	117.538	4	8600000	3300000	0.666667	0.333333	2.60606	0.21808
F1LN42	Protein Tns1 OS=Rattus norvegicus GN=Tns1 PE=1 SV=2	53.955	67	1631	64	1	1909	203.784	7.77	120000000	160000000	77000000	42000000	55000000	40000000	5.432	24191.8	67	119000000	4.56667e+07	1	1	2.60584	0.218062
A0A0G2K022	Protein Rcn3 OS=Rattus norvegicus GN=Rcn3 PE=1 SV=1	33.8279	9	48	9	1	337	38.919	4.86	NA	NA	3900000	NA	1500000	NA	1.848	1352.95	9	3900000	1500000	0.333333	0.333333	2.6	0.217573
P43424	Galactose-1-phosphate uridylyltransferase OS=Rattus norvegicus GN=Galt PE=2 SV=1	9.49868	3	8	3	1	379	43.286	6.57	NA	3900000	NA	NA	1500000	NA	0.304	65.0247	3	3900000	1500000	0.333333	0.333333	2.6	0.217573
Q99PW9	Huntingtin interacting protein 1 related (Fragment) OS=Rattus norvegicus GN=Hip1r PE=2 SV=1	6.95088	7	51	6	1	1079	120.497	6.55	NA	17000000	10000000	NA	5200000	NA	0.207	406.52	7	13500000	5200000	0.666667	0.333333	2.59615	0.217251
A0A0G2K929	Protein Cep290 OS=Rattus norvegicus GN=Cep290 PE=4 SV=1	0.253991	1	17	1	1	2756	320.536	6.24	NA	56000000	NA	39000000	NA	4200000	0.008	69.1859	1	56000000	21600000	0.333333	0.666667	2.59259	0.216953
F1M614	Protein Lama2 OS=Rattus norvegicus GN=Lama2 PE=1 SV=3	4.80615	12	58	12	1	3121	343.637	6.19	2700000	7400000	7000000	NA	2200000	NA	0.134	630.878	12	5700000	2200000	1	0.333333	2.59091	0.216812
P14604	Enoyl-CoA hydratase, mitochondrial OS=Rattus norvegicus GN=Echs1 PE=1 SV=1	35.8621	10	253	10	1	290	31.496	8.13	50000000	170000000	44000000	25000000	46000000	31000000	2.831	3861.74	10	88000000	34000000	1	1	2.58824	0.216589
Q5BJU0	Protein Rras2 OS=Rattus norvegicus GN=Rras2 PE=1 SV=1	40.1961	7	124	5	1	204	23.385	6.01	20000000	25000000	22000000	6500000	15000000	4500000	1.955	3564.89	7	2.23333e+07	8.66667e+06	1	1	2.57692	0.215642
Q5FVG2	Band 4.1-like protein 5 OS=Rattus norvegicus GN=Epb41l5 PE=2 SV=2	7.11354	5	29	5	1	731	81.668	6.7	14000000	16000000	16000000	4600000	8200000	5100000	0.304	82.1152	5	1.53333e+07	5.96667e+06	1	1	2.56983	0.215049
A0A0G2JTX7	Protein Col6a5 OS=Rattus norvegicus GN=Col6a5 PE=1 SV=1	34.8404	79	1831	72	1	2632	288.803	6.39	150000000	190000000	150000000	49000000	92000000	50000000	3.001	34749.1	79	1.63333e+08	6.36667e+07	1	1	2.56545	0.214682
D4AAV9	Tetraspanin OS=Rattus norvegicus GN=Tspan9 PE=1 SV=1	20	5	97	5	1	330	36.678	8.09	17000000	21000000	15000000	5600000	9400000	5900000	0.73	2192.71	5	1.76667e+07	6.96667e+06	1	1	2.53589	0.212208
A0A0G2K1Z5	Aldehyde oxidase 3 OS=Rattus norvegicus GN=Aox3 PE=1 SV=1	12.9032	12	76	9	1	1333	146.567	6.71	11000000	9400000	16000000	1500000	8400000	4500000	0.389	1148.31	12	1.21333e+07	4800000	1	1	2.52778	0.21153
Q4V797	Interferon-gamma-inducible GTPase Ifgga1 protein OS=Rattus norvegicus GN=RGD1309362 PE=1 SV=1	32.6139	11	66	6	1	417	48.241	7.47	NA	4800000	NA	NA	1400000	2400000	0.983	762.614	11	4800000	1900000	0.333333	0.666667	2.52632	0.211407
O08565	C-X-C chemokine receptor type 4 OS=Rattus norvegicus GN=Cxcr4 PE=2 SV=1	3.4384	1	4	1	1	349	39.308	8.05	NA	NA	2400000	NA	NA	950000	0.11	48.0763	1	2400000	950000	0.333333	0.333333	2.52632	0.211407
Q63135	Complement component receptor 1-like protein OS=Rattus norvegicus GN=Cr1l PE=1 SV=1	26.8336	11	186	11	1	559	61.64	5.45	46000000	60000000	45000000	15000000	23000000	22000000	1.31	2324.13	11	5.03333e+07	20000000	1	1	2.51667	0.2106
G3V624	Coronin OS=Rattus norvegicus GN=Coro1c PE=1 SV=1	39.6624	20	400	19	1	474	53.144	7.08	56000000	120000000	47000000	22000000	34000000	33000000	5.898	9102.72	20	7.43333e+07	2.96667e+07	1	1	2.50562	0.209675
Q3MHS3	Aldo-keto reductase family 1, member C1 (Dihydrodiol dehydrogenase 1 20-alpha (3-alpha)-hydroxysteroid dehydrogenase) OS=Rattus norvegicus GN=Akr1c1 PE=1 SV=1	10.2167	5	163	4	0	323	36.98	8.44	35000000	33000000	33000000	8400000	21000000	11000000	0.748	3538.1	5	3.36667e+07	1.34667e+07	1	1	2.5	0.209205
Q62688	Inactive phospholipase C-like protein 1 OS=Rattus norvegicus GN=Plcl1 PE=1 SV=1	3.19343	2	2	1	1	1096	122.694	5.66	NA	NA	10000000	NA	NA	4000000	0.057	40.76	2	10000000	4000000	0.333333	0.333333	2.5	0.209205
D3ZWA8	Protein Appl1 OS=Rattus norvegicus GN=Appl1 PE=1 SV=3	27.4218	13	97	13	1	671	75.355	5.68	7300000	15000000	15000000	5000000	6800000	3200000	1.054	1077.46	13	1.24333e+07	5000000	1	1	2.48667	0.208089
A0A0G2KA38	Protein Isg20 OS=Rattus norvegicus GN=Isg20 PE=4 SV=1	15.1351	3	11	3	1	185	20.898	8.65	NA	6200000	5700000	2400000	NA	NA	0.389	46.9411	3	5950000	2400000	0.666667	0.333333	2.47917	0.207462
F7F350	Protein Syap1 OS=Rattus norvegicus GN=Syap1 PE=1 SV=1	13.0556	4	18	4	1	360	40.772	4.58	4900000	2000000	NA	1500000	1300000	NA	0.374	202.422	4	3450000	1400000	0.666667	0.666667	2.46429	0.206216
P54759	Ephrin type-A receptor 7 OS=Rattus norvegicus GN=Epha7 PE=1 SV=1	2.10421	2	9	2	1	998	111.881	5.8	24000000	NA	NA	3600000	16000000	NA	0.033	40.2714	2	24000000	9800000	0.333333	0.666667	2.44898	0.204936
P29066	Beta-arrestin-1 OS=Rattus norvegicus GN=Arrb1 PE=1 SV=1	29.1866	11	152	11	1	418	46.99	6.28	21000000	26000000	21000000	7700000	13000000	7100000	1.929	1022.43	11	2.26667e+07	9.26667e+06	1	1	2.44604	0.20469
O88350	Putative hydrolase RBBP9 OS=Rattus norvegicus GN=Rbbp9 PE=1 SV=2	44.6237	5	80	5	1	186	20.981	6.2	14000000	27000000	14000000	3900000	9300000	9300000	1.683	1614.5	5	1.83333e+07	7500000	1	1	2.44444	0.204556
G3V927	Discs, large homolog-associated protein 4 (Drosophila) OS=Rattus norvegicus GN=Dlgap4 PE=1 SV=1	6.55242	5	37	5	1	992	107.95	7.11	7900000	16000000	NA	NA	5000000	4800000	0.173	393.402	5	11950000	4900000	0.666667	0.666667	2.43878	0.204082
P31430	Dipeptidase 1 OS=Rattus norvegicus GN=Dpep1 PE=2 SV=2	70.9756	20	658	20	1	410	45.493	6.07	260000000	300000000	250000000	73000000	110000000	150000000	12.043	16673	20	270000000	111000000	1	1	2.43243	0.203551
A0A0G2K751	DnaJ homolog subfamily C member 8 OS=Rattus norvegicus GN=Dnajc8 PE=1 SV=1	12.6354	4	25	4	1	277	32.683	8.76	3600000	12000000	1900000	NA	2400000	NA	0.425	171.504	4	5.83333e+06	2400000	1	0.333333	2.43056	0.203394
P50123	Glutamyl aminopeptidase OS=Rattus norvegicus GN=Enpep PE=1 SV=2	24.6561	21	279	21	1	945	107.927	5.39	15000000	23000000	13000000	6100000	8400000	6500000	1.281	3102.16	21	17000000	7000000	1	1	2.42857	0.203228
Q64542	Plasma membrane calcium-transporting ATPase 4 OS=Rattus norvegicus GN=Atp2b4 PE=1 SV=1	21.197	19	259	11	1	1203	133.01	6.57	21000000	28000000	20000000	9800000	10000000	8700000	0.778	4448.59	19	23000000	9500000	1	1	2.42105	0.202599
P10247	H-2 class II histocompatibility antigen gamma chain OS=Rattus norvegicus GN=Cd74 PE=1 SV=2	17.1429	4	49	4	1	280	31.622	8.34	8500000	12000000	14000000	NA	2500000	7000000	0.73	1137.04	4	11500000	4750000	1	0.666667	2.42105	0.202599
P70541	Translation initiation factor eIF-2B subunit gamma OS=Rattus norvegicus GN=Eif2b3 PE=2 SV=2	7.30088	3	11	3	1	452	50.403	6.96	120000000	NA	NA	3200000	NA	96000000	0.205	180.489	3	120000000	49600000	0.333333	0.666667	2.41935	0.202456
D3Z9E6	Cleavage and polyadenylation specific factor 2 (Predicted) OS=Rattus norvegicus GN=Cpsf2 PE=1 SV=1	4.4757	3	10	3	1	782	88.295	5.11	NA	NA	4700000	NA	1300000	2600000	0.126	65.3588	3	4700000	1950000	0.333333	0.666667	2.41026	0.201695
B2RZA4	RCG31866, isoform CRA_a OS=Rattus norvegicus GN=Ap1m2 PE=2 SV=1	13.948	6	76	2	1	423	48.152	7.55	6900000	7600000	6400000	2900000	NA	NA	0.453	191.839	6	6.96667e+06	2900000	1	0.333333	2.4023	0.201029
F1MA70	Cation-transporting ATPase OS=Rattus norvegicus GN=Atp13a5 PE=3 SV=2	0.493421	1	9	1	1	1216	136.374	8.05	NA	12000000	NA	5300000	4700000	NA	0.034	109.343	1	12000000	5000000	0.333333	0.666667	2.4	0.200837
F1LRH4	Protein Lamc2 OS=Rattus norvegicus GN=Lamc2 PE=4 SV=1	21.3087	22	243	22	1	1192	130.831	6.21	13000000	18000000	18000000	3500000	4000000	13000000	0.813	4277.22	22	1.63333e+07	6.83333e+06	1	1	2.39024	0.20002
B1H282	Glycosyltransferase 25 domain containing 1 OS=Rattus norvegicus GN=Colgalt1 PE=1 SV=1	11.9935	8	44	8	1	617	71.069	7.12	4300000	NA	NA	NA	NA	1800000	0.48	738.529	8	4300000	1800000	0.333333	0.333333	2.38889	0.199907
F7DLY1	Eps8l2 protein OS=Rattus norvegicus GN=Eps8l2 PE=1 SV=2	24.9657	13	123	13	1	729	82.225	7.2	16000000	16000000	14000000	5800000	7600000	5900000	0.797	2003	13	1.53333e+07	6.43333e+06	1	1	2.38342	0.199449
P10824	Guanine nucleotide-binding protein G(i) subunit alpha-1 OS=Rattus norvegicus GN=Gnai1 PE=1 SV=3	30.5085	9	251	4	1	354	40.319	5.97	3600000	6000000	4700000	1300000	3600000	1100000	1.471	4346.04	9	4.76667e+06	2000000	1	1	2.38333	0.199442
F1LPP6	A-kinase anchor protein 5 OS=Rattus norvegicus GN=Akap5 PE=1 SV=1	31.7927	16	242	16	1	714	75.926	4.74	39000000	40000000	35000000	8000000	20000000	20000000	2.075	4322.16	16	38000000	16000000	1	1	2.375	0.198745
Q792I0	Protein lin-7 homolog C OS=Rattus norvegicus GN=Lin7c PE=1 SV=1	29.4416	5	91	5	1	197	21.82	8.43	23000000	30000000	23000000	10000000	10000000	12000000	0.995	3160.59	5	2.53333e+07	1.06667e+07	1	1	2.375	0.198745
Q7TP42	Ab2-292 OS=Rattus norvegicus GN=Sec62 PE=1 SV=1	5.12397	3	19	3	1	605	67.888	7.58	NA	NA	7100000	NA	3000000	NA	0.155	49.8089	3	7100000	3000000	0.333333	0.333333	2.36667	0.198047
Q9Z339	Glutathione S-transferase omega-1 OS=Rattus norvegicus GN=Gsto1 PE=1 SV=2	27.8008	6	42	6	1	241	27.651	6.68	8800000	9100000	4800000	NA	NA	3200000	0.931	297.121	6	7.56667e+06	3200000	1	0.333333	2.36458	0.197873
Q63768	Adapter molecule crk OS=Rattus norvegicus GN=Crk PE=1 SV=1	31.9079	9	151	9	1	304	33.824	5.55	23000000	27000000	23000000	9100000	12000000	9800000	1.818	2252.78	9	2.43333e+07	10300000	1	1	2.36246	0.197695
A0A096MJG7	Protein Nebl (Fragment) OS=Rattus norvegicus GN=Nebl PE=4 SV=1	69.8413	9	207	8	1	126	14.914	8.68	92000000	120000000	87000000	43000000	46000000	38000000	5.105	2002.36	9	9.96667e+07	4.23333e+07	1	1	2.35433	0.197015
Q6AYD6	PDZ and LIM domain protein 2 OS=Rattus norvegicus GN=Pdlim2 PE=1 SV=1	44.1261	13	203	13	1	349	37.557	8.65	31000000	37000000	28000000	15000000	14000000	12000000	3.786	2704.4	13	32000000	1.36667e+07	1	1	2.34146	0.195938
G3V796	Acetyl-Coenzyme A dehydrogenase, medium chain OS=Rattus norvegicus GN=Acadm PE=1 SV=1	33.4917	12	212	12	1	421	46.542	8.41	18000000	25000000	45000000	7600000	16000000	14000000	1.848	2531.73	12	2.93333e+07	1.25333e+07	1	1	2.34043	0.195852
D4A164	Protein Nebl OS=Rattus norvegicus GN=Nebl PE=1 SV=2	10.0493	9	125	9	1	1015	116.026	7.83	35000000	44000000	38000000	14000000	19000000	17000000	0.411	2347.38	9	39000000	1.66667e+07	1	1	2.34	0.195816
B1WBY8	Hdac2 protein (Fragment) OS=Rattus norvegicus GN=Hdac2 PE=2 SV=1	14.8352	7	76	3	1	546	61.383	7.18	8600000	5300000	12000000	NA	NA	3700000	0.619	1006.77	7	8.63333e+06	3700000	1	0.333333	2.33333	0.195258
A0A0A0MXX8	F-BAR domain only protein 2 OS=Rattus norvegicus GN=Fcho2 PE=1 SV=2	10.2596	6	76	6	1	809	88.657	6.89	6100000	31000000	31000000	3100000	22000000	4100000	0.259	373.795	6	22700000	9.73333e+06	1	1	2.33219	0.195162
Q5I0E7	Transmembrane emp24 domain-containing protein 9 OS=Rattus norvegicus GN=Tmed9 PE=1 SV=1	26.8085	7	103	5	1	235	27.011	8.27	27000000	11000000	29000000	7900000	9900000	11000000	1.637	1997.15	7	2.23333e+07	9600000	1	1	2.32639	0.194677
Q4V8C3	Echinoderm microtubule-associated protein-like 1 OS=Rattus norvegicus GN=Eml1 PE=1 SV=2	36.2408	22	211	21	1	814	89.746	7.02	18000000	26000000	16000000	5000000	11000000	9800000	1.859	2123.85	22	20000000	8600000	1	1	2.32558	0.194609
P19234	NADH dehydrogenase [ubiquinone] flavoprotein 2, mitochondrial OS=Rattus norvegicus GN=Ndufv2 PE=1 SV=2	13.7097	3	49	3	1	248	27.361	6.68	13000000	14000000	15000000	3200000	11000000	3900000	0.389	1002.62	3	14000000	6.03333e+06	1	1	2.32044	0.194179
A0A096MJT3	Protein Sept4 OS=Rattus norvegicus GN=Sept4 PE=1 SV=1	38.0556	14	214	13	1	360	41.842	6.9	39000000	42000000	35000000	14000000	18000000	18000000	3.047	4103.34	14	3.86667e+07	1.66667e+07	1	1	2.32	0.194142
A0A0H2UHU1	60S ribosomal protein L37a OS=Rattus norvegicus GN=Rpl37a PE=3 SV=1	31.5217	3	40	3	1	92	10.269	10.29	10000000	13000000	9700000	1900000	NA	7500000	1.154	468.278	3	10900000	4700000	1	0.666667	2.31915	0.194071
Q9Z254	PDZ domain-containing protein GIPC1 OS=Rattus norvegicus GN=Gipc1 PE=1 SV=2	13.5135	3	29	2	1	333	36.111	5.91	NA	3800000	6600000	NA	1800000	2700000	0.425	152.188	3	5200000	2250000	0.666667	0.666667	2.31111	0.193398
D3ZD05	Protein Kank2 OS=Rattus norvegicus GN=Kank2 PE=1 SV=2	36.8359	26	291	25	1	847	90.828	5.43	27000000	29000000	17000000	6900000	15000000	9700000	1.829	5803.97	26	2.43333e+07	1.05333e+07	1	1	2.31013	0.193316
F1SW39	PC4 and SFRS1 interacting protein 1 OS=Rattus norvegicus GN=Psip1 PE=1 SV=1	7.95455	4	26	3	1	528	59.579	9.13	520000	23000000	4200000	NA	NA	4000000	0.198	202.799	4	9240000	4000000	1	0.333333	2.31	0.193305
P85845	Fascin OS=Rattus norvegicus GN=Fscn1 PE=1 SV=2	41.5822	18	241	7	1	493	54.457	6.74	4600000	9800000	2200000	NA	2400000	NA	2.44	5557.64	18	5.53333e+06	2400000	1	0.333333	2.30556	0.192934
A0A0G2KAJ7	Collagen alpha-1(XII) chain OS=Rattus norvegicus GN=Col12a1 PE=1 SV=1	17.0538	37	383	37	1	3143	342.315	5.64	16000000	25000000	24000000	5800000	7400000	15000000	0.624	5786.39	37	2.16667e+07	9400000	1	1	2.30496	0.192884
B0K017	ADP-ribosylhydrolase like 2 OS=Rattus norvegicus GN=Adprhl2 PE=1 SV=1	11.6216	3	19	3	1	370	39.35	4.96	5100000	NA	7800000	2800000	NA	NA	0.624	447.223	3	6450000	2800000	0.666667	0.333333	2.30357	0.192767
D4AE68	Guanine nucleotide binding protein, alpha q polypeptide, isoform CRA_a OS=Rattus norvegicus GN=Gnaq PE=1 SV=2	44.0111	14	293	8	1	359	42.131	5.68	31000000	36000000	25000000	12000000	17000000	11000000	2.398	5508.47	14	3.06667e+07	1.33333e+07	1	1	2.3	0.192469
B2RYW8	MICOS complex subunit Mic10 OS=Rattus norvegicus GN=Minos1 PE=3 SV=1	10.5263	1	8	1	1	76	8.544	9.25	NA	NA	17000000	7400000	NA	NA	0.778	0	1	17000000	7400000	0.333333	0.333333	2.2973	0.192242
F1M8K0	Protein Dag1 OS=Rattus norvegicus GN=Dag1 PE=1 SV=1	15.2296	13	284	13	1	893	96.646	8.44	41000000	52000000	28000000	16000000	16000000	21000000	1.019	2561.93	13	4.03333e+07	1.76667e+07	1	1	2.28302	0.191048
G3V647	Pyridoxal kinase OS=Rattus norvegicus GN=Pdxk PE=1 SV=1	41.9872	9	138	9	1	312	34.833	6.8	15000000	13000000	11000000	4900000	8900000	3300000	2.162	2617.09	9	13000000	5700000	1	1	2.2807	0.190854
P45479	Palmitoyl-protein thioesterase 1 OS=Rattus norvegicus GN=Ppt1 PE=1 SV=1	35.9477	7	141	7	1	306	34.432	7.43	15000000	15000000	14000000	2300000	6000000	11000000	1.61	3660.01	7	1.46667e+07	6.43333e+06	1	1	2.27979	0.190778
A0A0G2JU05	Protein Llgl2 OS=Rattus norvegicus GN=Llgl2 PE=1 SV=1	19.5915	14	131	14	1	1077	119.576	8.19	18000000	17000000	14000000	7600000	6200000	7700000	0.604	2297.46	14	1.63333e+07	7.16667e+06	1	1	2.27907	0.190717
Q9ESS6	Basal cell adhesion molecule OS=Rattus norvegicus GN=Bcam PE=2 SV=1	61.6987	26	939	26	1	624	67.469	5.78	220000000	290000000	210000000	96000000	120000000	100000000	8.454	21842.1	26	240000000	1.05333e+08	1	1	2.27848	0.190668
D3ZUL3	Protein Col6a1 OS=Rattus norvegicus GN=Col6a1 PE=1 SV=1	40.5854	33	1531	33	1	1025	108.738	5.36	390000000	470000000	370000000	130000000	210000000	200000000	4.089	39626.2	33	410000000	180000000	1	1	2.27778	0.190609
Q99MA2	Membrane-bound aminopeptidase P OS=Rattus norvegicus GN=Xpnpep2 PE=1 SV=1	44.8071	22	539	22	1	674	76.032	5.74	91000000	110000000	81000000	38000000	45000000	41000000	3.19	11180.5	22	94000000	4.13333e+07	1	1	2.27419	0.190309
Q64361	Latexin OS=Rattus norvegicus GN=Lxn PE=1 SV=1	21.9731	4	53	4	1	223	25.564	6.15	27000000	29000000	19000000	11000000	10000000	12000000	1.154	1726.44	4	25000000	11000000	1	1	2.27273	0.190186
F1LX81	Protein Slfn5 OS=Rattus norvegicus GN=Slfn5 PE=1 SV=3	25.1131	19	152	19	1	884	101.069	6.65	8200000	15000000	7000000	3900000	4500000	4900000	1.294	1842.77	19	1.00667e+07	4.43333e+06	1	1	2.27068	0.190015
E9PT66	Protein Sf3b3 OS=Rattus norvegicus GN=Sf3b3 PE=1 SV=2	28.3484	28	308	28	1	1217	135.465	5.26	57000000	73000000	63000000	16000000	48000000	21000000	1.558	5512.49	28	6.43333e+07	2.83333e+07	1	1	2.27059	0.190007
F1LM84	Nidogen-1 OS=Rattus norvegicus GN=Nid1 PE=1 SV=1	48.2343	40	1214	39	1	1246	136.952	5.47	130000000	160000000	130000000	52000000	63000000	70000000	6.627	30986.4	40	140000000	6.16667e+07	1	1	2.27027	0.189981
A0A0G2K2M9	Protein Srrm2 OS=Rattus norvegicus GN=Srrm2 PE=1 SV=1	3.54636	8	80	8	1	2707	295.932	12.02	9100000	9000000	8900000	5000000	3300000	3600000	0.087	531.503	8	9000000	3.96667e+06	1	1	2.26891	0.189867
F1M7E5	Protein Cdh5 OS=Rattus norvegicus GN=Cdh5 PE=1 SV=2	22.2938	15	251	15	1	776	87.08	5.31	40000000	48000000	32000000	17000000	22000000	14000000	1.291	5490.86	15	40000000	1.76667e+07	1	1	2.26415	0.189469
B4F795	Choline transporter-like protein 2 OS=Rattus norvegicus GN=Slc44a2 PE=2 SV=1	13.9007	9	123	9	1	705	79.844	8.79	31000000	40000000	33000000	16000000	14000000	16000000	0.54	1306.87	9	3.46667e+07	1.53333e+07	1	1	2.26087	0.189194
Q5RJR2	Twinfilin-1 OS=Rattus norvegicus GN=Twf1 PE=1 SV=1	38	11	165	9	1	350	40.065	6.67	7500000	12000000	43000000	6700000	8000000	13000000	1.913	2551.43	11	2.08333e+07	9.23333e+06	1	1	2.25632	0.188813
Q6MG60	N(G),N(G)-dimethylarginine dimethylaminohydrolase 2 OS=Rattus norvegicus GN=Ddah2 PE=1 SV=1	38.2456	10	173	9	1	285	29.669	6.01	58000000	71000000	22000000	25000000	19000000	23000000	3.084	1994.57	10	5.03333e+07	2.23333e+07	1	1	2.25373	0.188597
Q63495	Advanced glycosylation end product-specific receptor OS=Rattus norvegicus GN=Ager PE=1 SV=1	56.2189	13	1131	2	1	402	42.637	6.13	1600000000	2100000000	1500000000	700000000	840000000	770000000	12.183	21601.7	13	1.73333e+09	770000000	1	1	2.25108	0.188375
M0R671	Protein Tns2 OS=Rattus norvegicus GN=Tns2 PE=1 SV=1	20.9286	19	136	17	1	1400	151.759	8.38	10000000	12000000	9400000	NA	7000000	2300000	0.632	1640.39	19	1.04667e+07	4650000	1	0.666667	2.2509	0.18836
F1LS79	Chondroitin sulfate proteoglycan 4 OS=Rattus norvegicus GN=Cspg4 PE=4 SV=1	11.7799	20	182	20	1	2326	251.853	5.48	9000000	12000000	7100000	2400000	6500000	3600000	0.598	2222.93	20	9.36667e+06	4.16667e+06	1	1	2.248	0.188117
Q9WVR7	Protein phosphatase 1F OS=Rattus norvegicus GN=Ppm1f PE=2 SV=1	27.1111	9	158	9	1	450	49.135	5.35	16000000	20000000	15000000	9200000	3600000	9900000	2.02	3247.07	9	17000000	7.56667e+06	1	1	2.2467	0.188008
A0A0G2JWR2	Protein kinase C and casein kinase substrate in neurons protein 1 OS=Rattus norvegicus GN=Pacsin1 PE=1 SV=1	3.1746	2	15	2	0	441	50.344	5.22	NA	11000000	NA	4900000	NA	NA	0.136	53.684	2	11000000	4900000	0.333333	0.333333	2.2449	0.187858
A0A0H2UHB3	Carbonic anhydrase 4 OS=Rattus norvegicus GN=Car4 PE=4 SV=1	52.5478	14	298	14	1	314	35.557	6.8	110000000	130000000	65000000	43000000	57000000	36000000	7.111	2667.12	14	1.01667e+08	4.53333e+07	1	1	2.24265	0.187669
Q63118	Calcitonin gene-related peptide type 1 receptor OS=Rattus norvegicus GN=Calcrl PE=2 SV=1	13.1466	5	102	5	1	464	53.294	6.74	22000000	30000000	13000000	3100000	20000000	5900000	1.154	1358.86	5	2.16667e+07	9.66667e+06	1	1	2.24138	0.187563
M0R781	Protein Dpp9 OS=Rattus norvegicus GN=Dpp9 PE=1 SV=1	2.20418	2	24	2	1	862	98.019	6.57	1900000	3700000	NA	1400000	1100000	NA	0.12	317.125	2	2800000	1250000	0.666667	0.666667	2.24	0.187448
P63074	Eukaryotic translation initiation factor 4E OS=Rattus norvegicus GN=Eif4e PE=1 SV=1	21.659	5	48	5	1	217	25.037	6.15	79000000	300000000	56000000	77000000	7200000	110000000	1.371	560.616	5	145000000	6.47333e+07	1	1	2.23996	0.187444
P41350	Caveolin-1 OS=Rattus norvegicus GN=Cav1 PE=1 SV=3	67.9775	10	501	3	1	178	20.539	5.53	300000000	400000000	170000000	100000000	140000000	150000000	9	7270.37	10	290000000	130000000	1	1	2.23077	0.186675
Q9Z1M9	Structural maintenance of chromosomes protein 1A OS=Rattus norvegicus GN=Smc1a PE=1 SV=1	12.0032	13	92	13	1	1233	143.116	7.64	5800000	12000000	17000000	6800000	2800000	6000000	0.283	908.917	13	11600000	5200000	1	1	2.23077	0.186675
D3ZIL6	Enoyl Coenzyme A hydratase domain containing 2 (Predicted), isoform CRA_a OS=Rattus norvegicus GN=Echdc2 PE=1 SV=1	23.6486	6	36	6	1	296	31.759	9.33	9600000	6200000	NA	3200000	3900000	NA	1.081	1118.03	6	7900000	3550000	0.666667	0.666667	2.22535	0.186222
B4F7E7	Membrane protein, palmitoylated 5 (MAGUK p55 subfamily member 5) OS=Rattus norvegicus GN=Mpp5 PE=1 SV=1	12.1481	7	61	7	1	675	77.105	6.27	7400000	7100000	4400000	2200000	3500000	2800000	0.348	1376.28	7	6300000	2.83333e+06	1	1	2.22353	0.186069
P06536	Glucocorticoid receptor OS=Rattus norvegicus GN=Nr3c1 PE=1 SV=2	3.39623	3	13	3	1	795	87.501	6.77	1400000	7400000	1200000	NA	1500000	NA	0.136	88.7024	3	3.33333e+06	1500000	1	0.333333	2.22222	0.18596
Q6QBQ4	Phospholipid scramblase 3 OS=Rattus norvegicus GN=Plscr3 PE=2 SV=1	9.12162	3	50	3	1	296	31.626	6.64	7300000	9600000	8200000	4000000	3600000	3700000	0.468	1221.61	3	8.36667e+06	3.76667e+06	1	1	2.22124	0.185878
Q63228	Glia maturation factor beta OS=Rattus norvegicus GN=Gmfb PE=1 SV=2	37.3239	5	98	5	1	142	16.726	5.44	62000000	75000000	34000000	21000000	24000000	32000000	1.848	1545.36	5	57000000	2.56667e+07	1	1	2.22078	0.185839
A0A0G2JZ40	Protein Reck OS=Rattus norvegicus GN=Reck PE=4 SV=1	9.77366	7	41	7	1	972	105.901	6.84	9300000	13000000	8100000	3900000	6300000	3500000	0.267	1396.75	7	1.01333e+07	4.56667e+06	1	1	2.21898	0.185689
P20595	Guanylate cyclase soluble subunit beta-1 OS=Rattus norvegicus GN=Gucy1b3 PE=1 SV=2	40.5493	22	323	22	1	619	70.412	5.4	23000000	24000000	24000000	9000000	13000000	10000000	2.907	4732.3	22	2.36667e+07	1.06667e+07	1	1	2.21875	0.185669
D4A2X2	Unconventional myosin-Ib OS=Rattus norvegicus GN=Myo1b PE=1 SV=3	42.7817	41	585	40	1	1136	131.835	9.36	37000000	50000000	26000000	12000000	17000000	22000000	2.398	10748.1	41	3.76667e+07	17000000	1	1	2.21569	0.185413
A0A0G2JZZ0	Adhesion G protein-coupled receptor F5 OS=Rattus norvegicus GN=Adgrf5 PE=1 SV=1	6.21387	8	67	8	1	1384	153.065	6.92	7600000	10000000	8500000	2800000	6000000	3000000	0.233	476.426	8	8700000	3.93333e+06	1	1	2.21186	0.185093
G3V9G5	Protein Synm OS=Rattus norvegicus GN=Synm PE=1 SV=2	23.6352	30	282	30	1	1557	172.775	5.1	21000000	21000000	19000000	5600000	11000000	11000000	0.861	4634.71	30	2.03333e+07	9200000	1	1	2.21014	0.184949
P36201	Cysteine-rich protein 2 OS=Rattus norvegicus GN=Crip2 PE=2 SV=1	67.7885	8	388	8	1	208	22.681	8.63	200000000	190000000	170000000	67000000	96000000	91000000	9	3763.41	8	1.86667e+08	8.46667e+07	1	1	2.20472	0.184496
O55158	Tetraspanin OS=Rattus norvegicus GN=Tspan8 PE=1 SV=2	39.1489	7	174	7	1	235	25.528	5.67	160000000	230000000	170000000	86000000	95000000	73000000	2.162	3275.18	7	1.86667e+08	8.46667e+07	1	1	2.20472	0.184496
P16970	ATP-binding cassette sub-family D member 3 OS=Rattus norvegicus GN=Abcd3 PE=1 SV=3	14.871	7	68	7	1	659	75.267	9.25	61000000	46000000	41000000	1800000	NA	43000000	0.389	532.983	7	4.93333e+07	22400000	1	0.666667	2.20238	0.1843
B5DFC9	Nidogen-2 OS=Rattus norvegicus GN=Nid2 PE=2 SV=1	33.5244	32	463	31	1	1396	152.88	5.47	27000000	45000000	27000000	12000000	16000000	17000000	2.311	8467.44	32	33000000	15000000	1	1	2.2	0.1841
D2E6L7	NADH-ubiquinone oxidoreductase chain 1 OS=Rattus norvegicus GN=ND1 PE=3 SV=1	11.6352	3	15	3	1	318	36.038	6.92	NA	NA	7700000	NA	3500000	NA	1.371	58.8203	3	7700000	3500000	0.333333	0.333333	2.2	0.1841
P09456	cAMP-dependent protein kinase type I-alpha regulatory subunit OS=Rattus norvegicus GN=Prkar1a PE=1 SV=2	26.2467	10	143	10	1	381	43.068	5.35	37000000	54000000	43000000	23000000	11000000	27000000	1.264	1428.02	10	4.46667e+07	2.03333e+07	1	1	2.19672	0.183826
F1LNH3	Procollagen, type VI, alpha 2, isoform CRA_a OS=Rattus norvegicus GN=Col6a2 PE=1 SV=2	30.0876	27	995	27	1	1027	109.591	6.61	380000000	460000000	390000000	130000000	220000000	210000000	2.463	22534.3	27	410000000	1.86667e+08	1	1	2.19643	0.183802
D3ZUC9	Oxidative-stress responsive 1 (Predicted) OS=Rattus norvegicus GN=Oxsr1 PE=1 SV=1	14.611	7	50	7	1	527	58.168	6.57	5100000	20000000	9300000	5100000	3300000	7300000	0.482	679.806	7	1.14667e+07	5.23333e+06	1	1	2.19108	0.183354
Q3SWT0	Platelet endothelial cell adhesion molecule OS=Rattus norvegicus GN=Pecam1 PE=1 SV=1	39.9705	21	403	21	1	678	76.141	6.76	150000000	58000000	57000000	40000000	40000000	41000000	2.7	7036.72	21	8.83333e+07	4.03333e+07	1	1	2.19008	0.183271
P18614	Integrin alpha-1 OS=Rattus norvegicus GN=Itga1 PE=1 SV=1	20.339	23	390	22	1	1180	130.726	5.96	48000000	59000000	46000000	23000000	27000000	20000000	1.198	7288.35	23	51000000	2.33333e+07	1	1	2.18571	0.182905
Q2IBC5	Caveolin-2 OS=Rattus norvegicus GN=Cav2 PE=1 SV=2	63.5802	7	239	7	1	162	18.254	5.64	98000000	130000000	97000000	43000000	59000000	47000000	14.199	1139.89	7	1.08333e+08	4.96667e+07	1	1	2.18121	0.182528
Q9ESN0	Protein Niban OS=Rattus norvegicus GN=Fam129a PE=1 SV=2	28.175	22	267	22	1	937	103.401	4.7	13000000	48000000	21000000	8600000	18000000	11000000	1.575	3011.84	22	2.73333e+07	1.25333e+07	1	1	2.18085	0.182498
D4A8U7	Dynactin 1, isoform CRA_a OS=Rattus norvegicus GN=Dctn1 PE=1 SV=2	24.6682	24	266	24	1	1281	141.856	5.9	9900000	17000000	18000000	6400000	7300000	6900000	0.968	7234.8	24	1.49667e+07	6.86667e+06	1	1	2.17961	0.182394
P23457	3-alpha-hydroxysteroid dehydrogenase OS=Rattus norvegicus GN=Akr1c9 PE=1 SV=1	59.3168	15	265	13	1	322	37.004	7.09	44000000	50000000	41000000	17000000	24000000	21000000	3.894	3067.85	15	45000000	2.06667e+07	1	1	2.17742	0.182211
O35370	Protein Thbd OS=Rattus norvegicus GN=Thbd PE=1 SV=1	32.0624	10	337	10	1	577	61.804	4.75	120000000	130000000	100000000	49000000	71000000	41000000	3.924	9472.47	10	1.16667e+08	5.36667e+07	1	1	2.17391	0.181917
Q5M876	N-acyl-aromatic-L-amino acid amidohydrolase (carboxylate-forming) OS=Rattus norvegicus GN=Acy3 PE=1 SV=1	7.52351	2	24	2	1	319	35.397	5.64	8300000	13000000	NA	4900000	NA	4900000	0.468	673.283	2	10650000	4900000	0.666667	0.666667	2.17347	0.18188
Q9ERU2	Zinc finger protein 22 OS=Rattus norvegicus GN=Znf22 PE=2 SV=2	24.8945	5	42	5	1	237	27.269	10.29	7200000	7900000	4100000	NA	2800000	3100000	0.874	939.762	5	6400000	2950000	1	0.666667	2.16949	0.181547
P35284	Ras-related protein Rab-12 OS=Rattus norvegicus GN=Rab12 PE=1 SV=2	30.0412	7	121	6	1	243	27.254	8.41	6700000	12000000	6000000	4200000	4300000	2900000	0.957	2107.77	7	8.23333e+06	3800000	1	1	2.16667	0.181311
Q9WUF4	Vesicle-associated membrane protein 8 OS=Rattus norvegicus GN=Vamp8 PE=1 SV=1	42	5	132	5	1	100	11.313	8.84	21000000	35000000	30000000	18000000	6700000	15000000	6.743	2000.13	5	2.86667e+07	1.32333e+07	1	1	2.16625	0.181276
P15791	Calcium/calmodulin-dependent protein kinase type II subunit delta OS=Rattus norvegicus GN=Camk2d PE=1 SV=1	38.4615	16	338	13	1	533	60.043	7.27	36000000	45000000	38000000	16000000	22000000	17000000	2.162	4200.55	16	3.96667e+07	1.83333e+07	1	1	2.16364	0.181057
F1LXA9	Protein Plekha2 OS=Rattus norvegicus GN=Plekha2 PE=1 SV=2	8	3	36	3	1	425	47.217	8.82	3000000	3300000	3100000	NA	1500000	1400000	0.212	185.274	3	3.13333e+06	1450000	1	0.666667	2.16092	0.18083
Q924S1	1-acyl-sn-glycerol-3-phosphate acyltransferase delta OS=Rattus norvegicus GN=Agpat4 PE=2 SV=1	7.14286	3	22	3	1	378	43.765	8.41	NA	NA	5400000	NA	NA	2500000	0.25	226.262	3	5400000	2500000	0.333333	0.333333	2.16	0.180753
Q9EPT8	Chloride intracellular channel protein 5 OS=Rattus norvegicus GN=Clic5 PE=1 SV=1	78.8845	16	622	15	1	251	28.281	5.94	340000000	320000000	290000000	130000000	180000000	130000000	18.307	17353.3	16	3.16667e+08	1.46667e+08	1	1	2.15909	0.180677
F1LRP7	Protein argonaute-2 OS=Rattus norvegicus GN=Ago2 PE=1 SV=2	8.75	6	30	4	1	880	99.479	9.14	4400000	NA	3800000	1900000	NA	NA	0.263	298.032	6	4100000	1900000	0.666667	0.333333	2.15789	0.180577
A0A0G2K3I9	MAGUK p55 subfamily member 3 OS=Rattus norvegicus GN=Dusp3 PE=1 SV=1	34.5972	5	142	5	1	211	23.061	5.85	15000000	21000000	20000000	7400000	9900000	8700000	2.415	3795.42	5	1.86667e+07	8.66667e+06	1	1	2.15385	0.180238
D4ADJ8	Protein Tmem26 OS=Rattus norvegicus GN=Tmem26 PE=1 SV=1	5.46448	2	23	2	1	366	41.408	6.68	4700000	3400000	3500000	NA	1800000	NA	0.212	92.1765	2	3.86667e+06	1800000	1	0.333333	2.14815	0.179761
Q6AYF8	Protein Serpinb9 OS=Rattus norvegicus GN=Serpinb9 PE=1 SV=1	39.5722	13	223	12	1	374	42.274	5.86	40000000	40000000	34000000	19000000	25000000	9100000	2.039	4844.46	13	38000000	17700000	1	1	2.14689	0.179656
P59215	Guanine nucleotide-binding protein G(o) subunit alpha OS=Rattus norvegicus GN=Gnao1 PE=1 SV=2	29.661	9	184	7	1	354	40.043	5.53	11000000	12000000	9800000	NA	4800000	5400000	1.346	3191.39	9	1.09333e+07	5100000	1	0.666667	2.14379	0.179397
A0A0G2JSK5	Integrin beta 1 (Fibronectin receptor beta) OS=Rattus norvegicus GN=Itgb1 PE=1 SV=1	39.9749	28	1040	27	1	798	88.286	6.01	160000000	230000000	180000000	72000000	100000000	94000000	4.456	23294.6	28	190000000	8.86667e+07	1	1	2.14286	0.179319
O35568	EGF-containing fibulin-like extracellular matrix protein 1 OS=Rattus norvegicus GN=Efemp1 PE=1 SV=1	35.0913	12	156	12	1	493	54.56	5.11	22000000	33000000	22000000	10000000	16000000	10000000	2.162	3322.13	12	2.56667e+07	12000000	1	1	2.13889	0.178987
B1H270	Succinyl-CoA ligase subunit beta OS=Rattus norvegicus GN=Suclg2 PE=2 SV=1	38.9401	12	158	12	1	434	46.959	7.72	26000000	20000000	22000000	8800000	13000000	10000000	1.198	2800.41	12	2.26667e+07	10600000	1	1	2.13836	0.178943
R9PXT6	Focal adhesion kinase 1 OS=Rattus norvegicus GN=Ptk2 PE=1 SV=2	12.7014	10	92	10	1	1055	119.64	6.68	7900000	9500000	7800000	3200000	3900000	4700000	0.32	1244.78	10	8400000	3.93333e+06	1	1	2.13559	0.178711
A3KNA0	Aqr protein OS=Rattus norvegicus GN=Aqr PE=1 SV=1	1.28032	1	15	1	1	1484	170.652	6.35	3200000	3600000	2800000	1500000	NA	NA	0.024	102.729	1	3200000	1500000	1	0.333333	2.13333	0.178522
Q64428	Trifunctional enzyme subunit alpha, mitochondrial OS=Rattus norvegicus GN=Hadha PE=1 SV=2	35.9109	23	443	23	1	763	82.613	9.06	35000000	53000000	42000000	16000000	24000000	21000000	1.726	8212.25	23	4.33333e+07	2.03333e+07	1	1	2.13115	0.178339
P14668	Annexin A5 OS=Rattus norvegicus GN=Anxa5 PE=1 SV=3	74.6082	21	1011	20	1	319	35.722	5.05	730000000	830000000	760000000	360000000	250000000	480000000	9	31288.2	21	7.73333e+08	3.63333e+08	1	1	2.12844	0.178112
G3V6D9	Na(+)/H(+) exchange regulatory cofactor NHE-RF OS=Rattus norvegicus GN=Slc9a3r2 PE=1 SV=1	66.1721	21	547	21	1	337	37.328	7.58	99000000	130000000	90000000	42000000	61000000	47000000	17.166	10344.7	21	1.06333e+08	50000000	1	1	2.12667	0.177964
P47820	Angiotensin-converting enzyme OS=Rattus norvegicus GN=Ace PE=1 SV=1	40.5179	40	1208	40	1	1313	150.812	6.58	160000000	190000000	130000000	71000000	90000000	65000000	4.545	23167.2	40	160000000	7.53333e+07	1	1	2.12389	0.177732
Q6P9V1	Tetraspanin OS=Rattus norvegicus GN=Cd81 PE=1 SV=1	28.3898	4	175	4	1	236	25.887	5.52	150000000	170000000	160000000	60000000	91000000	75000000	3.329	6114.2	4	160000000	7.53333e+07	1	1	2.12389	0.177732
D3ZHI6	Protein Ctla2a OS=Rattus norvegicus GN=Ctla2a PE=1 SV=1	15.9292	2	41	2	1	113	13.02	5.58	7900000	11000000	NA	5000000	NA	3900000	1.154	306.841	2	9450000	4450000	0.666667	0.666667	2.1236	0.177707
D3ZQN7	Protein Lamb1 OS=Rattus norvegicus GN=Lamb1 PE=1 SV=3	29.1153	41	489	40	1	1786	197.264	4.97	30000000	41000000	33000000	16000000	14000000	19000000	1.4	7950.61	41	3.46667e+07	1.63333e+07	1	1	2.12245	0.177611
Q6P6Q2	Keratin, type II cytoskeletal 5 OS=Rattus norvegicus GN=Krt5 PE=1 SV=1	25.5208	17	264	8	1	576	61.788	7.8	NA	NA	7000000	NA	3300000	NA	2.001	3121.47	17	7000000	3300000	0.333333	0.333333	2.12121	0.177507
A0A0G2JW88	Microtubule-associated protein OS=Rattus norvegicus GN=Map4 PE=1 SV=1	15.7201	27	516	4	1	2201	233.25	5.62	17000000	17000000	27000000	NA	6200000	13000000	0.599	7041.15	27	2.03333e+07	9600000	1	0.666667	2.11806	0.177243
D3ZAF5	Periostin, osteoblast specific factor (Predicted), isoform CRA_a OS=Rattus norvegicus GN=Postn PE=1 SV=1	50.6173	30	1022	30	1	810	89.999	7.53	150000000	180000000	140000000	74000000	70000000	78000000	5.072	20836	30	1.56667e+08	74000000	1	1	2.11712	0.177165
P0C5H9	Mesencephalic astrocyte-derived neurotrophic factor OS=Rattus norvegicus GN=Manf PE=1 SV=1	45.8101	8	65	8	1	179	20.375	8.25	39000000	11000000	96000000	15000000	17000000	37000000	2.162	247.889	8	4.86667e+07	23000000	1	1	2.11594	0.177066
B2RYW9	Fumarylacetoacetate hydrolase domain-containing protein 2 OS=Rattus norvegicus GN=Fahd2 PE=1 SV=1	19.4888	5	55	5	1	313	34.559	8.35	5500000	6400000	12000000	4500000	5000000	1800000	0.688	928.794	5	7.96667e+06	3.76667e+06	1	1	2.11504	0.176991
E9PTA4	Protein Adam9 OS=Rattus norvegicus GN=Adam9 PE=1 SV=2	4.49704	3	31	3	1	845	92.308	7.47	2900000	6300000	3700000	2000000	2300000	1800000	0.142	365.394	3	4300000	2.03333e+06	1	1	2.11475	0.176967
P14942	Glutathione S-transferase alpha-4 OS=Rattus norvegicus GN=Gsta4 PE=1 SV=2	26.1261	7	207	6	1	222	25.493	7.33	79000000	86000000	59000000	29000000	46000000	31000000	2.384	1156.02	7	7.46667e+07	3.53333e+07	1	1	2.11321	0.176837
P47853	Biglycan OS=Rattus norvegicus GN=Bgn PE=2 SV=1	50.9485	14	439	13	1	369	41.68	7.52	84000000	88000000	90000000	39000000	36000000	49000000	4.055	9515.19	14	8.73333e+07	4.13333e+07	1	1	2.1129	0.176812
A0A0G2JSM7	Adducin 1 (Alpha), isoform CRA_b OS=Rattus norvegicus GN=Add1 PE=1 SV=1	34.966	20	240	20	1	735	80.289	6.15	27000000	33000000	19000000	9400000	17000000	11000000	1.929	4682.55	20	2.63333e+07	1.24667e+07	1	1	2.1123	0.176761
F1LSG0	Neural Wiskott-Aldrich syndrome protein OS=Rattus norvegicus GN=Wasl PE=1 SV=2	5.18962	3	12	3	1	501	54.262	7.93	NA	5000000	6400000	NA	2700000	NA	0.25	93.0452	3	5700000	2700000	0.666667	0.333333	2.11111	0.176662
Q6P762	Alpha-mannosidase OS=Rattus norvegicus GN=Man2b1 PE=1 SV=1	8.6224	6	29	6	1	1009	114.255	8.66	NA	9300000	120000000	NA	NA	3800000	1.818	1892.78	16	2.26667e+07	1.07667e+07	1	1	2.10526	0.176173
Q7TP38	Amine oxidase OS=Rattus norvegicus GN=Psme3 PE=2 SV=1	15.6707	19	631	17	1	1640	183.415	7.46	230000000	240000000	180000000	69000000	150000000	90000000	0.986	11885.1	19	2.16667e+08	103000000	1	1	2.10356	0.17603
Q99MC0	Protein phosphatase 1 regulatory subunit 14A OS=Rattus norvegicus GN=Ppp1r14a PE=1 SV=1	19.7279	2	74	2	1	147	16.687	8.02	38000000	53000000	15000000	23000000	9400000	18000000	0.638	1049.33	2	3.53333e+07	16800000	1	1	2.10317	0.175998
D4A5T8	Periplakin (Predicted) OS=Rattus norvegicus GN=Ppl PE=1 SV=1	59.8632	100	1542	100	1	1754	204.023	5.45	71000000	76000000	59000000	24000000	35000000	39000000	3.662	25452	100	6.86667e+07	3.26667e+07	1	1	2.10204	0.175903
G3V9Y1	Myosin, heavy polypeptide 10, non-muscle, isoform CRA_b OS=Rattus norvegicus GN=Myh10 PE=1 SV=1	51.9737	108	2766	79	1	1976	228.857	5.54	91000000	120000000	100000000	46000000	55000000	47000000	5.541	48996.5	108	1.03667e+08	4.93333e+07	1	1	2.10135	0.175845
D3ZY91	Chloride intracellular channel protein OS=Rattus norvegicus GN=Clic3 PE=3 SV=1	67.0886	12	413	12	1	237	26.76	5.97	38000000	45000000	43000000	17000000	24000000	19000000	13.678	9534.02	12	42000000	20000000	1	1	2.1	0.175732
F1MA59	Protein Col4a1 OS=Rattus norvegicus GN=Col4a1 PE=1 SV=1	4.49371	5	449	3	1	1669	160.512	8.29	70000000	97000000	91000000	34000000	40000000	49000000	0.244	7455.19	5	86000000	41000000	1	1	2.09756	0.175528
C0KUC6	LIM and senescent cell antigen-like domains 1 isoform E OS=Rattus norvegicus GN=Lims1 PE=1 SV=1	53.23	19	439	14	1	387	44.352	7.84	58000000	65000000	53000000	24000000	28000000	32000000	7.111	7027.15	19	5.86667e+07	28000000	1	1	2.09524	0.175334
Q66HG9	Mitochondrial antiviral-signaling protein OS=Rattus norvegicus GN=Mavs PE=1 SV=1	8.08679	3	23	3	1	507	53.771	6.46	6000000	6700000	5500000	NA	NA	2900000	0.28	114.869	3	6.06667e+06	2900000	1	0.333333	2.09195	0.175059
G3V617	Mitogen-activated protein kinase OS=Rattus norvegicus GN=Mapk14 PE=1 SV=1	24.7222	8	116	7	1	360	41.247	5.88	72000000	NA	3000000	7900000	11000000	4700000	1.276	3883.38	18	2.63333e+07	12600000	1	1	2.08995	0.174891
P12007	Isovaleryl-CoA dehydrogenase, mitochondrial OS=Rattus norvegicus GN=Ivd PE=1 SV=2	41.5094	16	253	16	1	424	46.406	7.9	51000000	66000000	50000000	19000000	36000000	25000000	2.162	3810.47	16	5.56667e+07	2.66667e+07	1	1	2.0875	0.174686
F1LRQ1	Aldehyde oxidase 1 OS=Rattus norvegicus GN=Aox1 PE=1 SV=3	2.17554	3	12	2	1	1333	146.803	6.96	NA	4800000	NA	NA	2300000	NA	0.072	71.9135	3	4800000	2300000	0.333333	0.333333	2.08696	0.174641
D3ZQ25	Fibulin-1 OS=Rattus norvegicus GN=Fbln1 PE=1 SV=1	23.4043	13	248	5	1	705	78.019	5.16	11000000	20000000	10000000	3300000	6400000	10000000	1.223	3275.11	13	1.36667e+07	6.56667e+06	1	1	2.08122	0.174161
Q6AY30	Saccharopine dehydrogenase-like oxidoreductase OS=Rattus norvegicus GN=Sccpdh PE=1 SV=1	15.3846	6	37	6	1	429	47.058	8.84	11000000	11000000	11000000	5900000	3900000	6100000	0.562	352.757	6	11000000	5300000	1	1	2.07547	0.17368
B3GNI6	Septin-11 OS=Rattus norvegicus GN=Sept11 PE=1 SV=1	49.42	18	506	9	1	431	49.663	6.68	80000000	110000000	91000000	40000000	46000000	50000000	3.948	9635.14	18	9.36667e+07	4.53333e+07	1	1	2.06618	0.172902
D3ZHA0	Filamin-C OS=Rattus norvegicus GN=Flnc PE=1 SV=1	32.6119	71	1005	57	1	2726	290.804	5.9	58000000	76000000	180000000	37000000	63000000	52000000	1.518	16134.3	71	1.04667e+08	5.06667e+07	1	1	2.06579	0.172869
Q08602	Geranylgeranyl transferase type-2 subunit alpha OS=Rattus norvegicus GN=Rabggta PE=1 SV=1	14.1093	6	28	6	1	567	64.863	5.66	NA	5200000	4300000	2300000	NA	NA	0.342	268.641	6	4750000	2300000	0.666667	0.333333	2.06522	0.172822
Q6P0K8	Junction plakoglobin OS=Rattus norvegicus GN=Jup PE=1 SV=1	59.8658	33	603	28	1	745	81.749	6.14	38000000	49000000	41000000	18000000	25000000	19000000	5.256	13445.8	33	4.26667e+07	2.06667e+07	1	1	2.06452	0.172763
Q6S395	Plectin OS=Rattus norvegicus GN=Plec PE=1 SV=1	55.0935	226	4146	1	1	4545	517.216	5.76	13000000	13000000	NA	5000000	NA	7600000	3.22	73149.3	226	13000000	6300000	0.666667	0.666667	2.06349	0.172677
P09217	Protein kinase C zeta type OS=Rattus norvegicus GN=Prkcz PE=1 SV=2	3.71622	2	24	1	1	592	67.69	5.76	4600000	4400000	4000000	NA	2200000	2000000	0.11	941.727	2	4.33333e+06	2100000	1	0.666667	2.06349	0.172677
F1LYQ8	FERM, RhoGEF and pleckstrin domain-containing protein 1 OS=Rattus norvegicus GN=Farp1 PE=1 SV=2	9.05624	9	92	9	1	1049	118.768	7.96	5700000	7700000	6600000	3200000	3000000	3500000	0.241	1771.86	9	6.66667e+06	3.23333e+06	1	1	2.06186	0.17254
Q499V8	Specifically androgen-regulated gene protein OS=Rattus norvegicus GN=Sarg PE=1 SV=2	13.0795	6	50	6	1	604	64.573	9.44	15000000	11000000	12000000	NA	4100000	8200000	0.326	691.481	6	1.26667e+07	6150000	1	0.666667	2.05962	0.172353
Q5XI80	SP100 nuclear antigen OS=Rattus norvegicus GN=Sp100 PE=2 SV=1	17.2515	5	45	2	1	342	38.381	5.45	NA	17000000	NA	6100000	8800000	9900000	0.65	255.271	5	17000000	8.26667e+06	0.333333	1	2.05645	0.172088
F1LTF8	Protein Lama4 OS=Rattus norvegicus GN=Lama4 PE=1 SV=3	26.1139	39	609	39	1	1773	196.825	6.33	38000000	43000000	34000000	14000000	19000000	23000000	1.229	10902.7	39	3.83333e+07	1.86667e+07	1	1	2.05357	0.171847
B6DYQ9	Glutathione S-transferase theta 2 OS=Rattus norvegicus GN=Gstt2 PE=2 SV=1	45.4918	8	226	7	1	244	27.422	7.91	52000000	61000000	43000000	20000000	30000000	26000000	4.623	4853.98	8	52000000	2.53333e+07	1	1	2.05263	0.171768
Q7TPB7	MAL2A OS=Rattus norvegicus GN=Mal2 PE=2 SV=1	18.1818	2	166	2	1	176	19.183	6.48	120000000	180000000	100000000	54000000	81000000	60000000	30.623	3811.23	2	1.33333e+08	65000000	1	1	2.05128	0.171655
G3V9M6	Fibrillin 1, isoform CRA_a OS=Rattus norvegicus GN=Fbn1 PE=1 SV=1	40.773	91	2237	91	1	2872	311.738	4.93	140000000	190000000	180000000	66000000	92000000	91000000	3.967	54442.2	91	170000000	83000000	1	1	2.04819	0.171397
Q63357	Unconventional myosin-Id OS=Rattus norvegicus GN=Myo1d PE=1 SV=3	44.831	41	580	39	1	1006	116.021	9.41	21000000	26000000	22000000	9700000	13000000	11000000	2.535	7581.65	41	23000000	1.12333e+07	1	1	2.04748	0.171337
D3Z8L7	Ras-related protein R-Ras OS=Rattus norvegicus GN=Rras PE=1 SV=1	44.4954	8	185	6	1	218	23.894	7.34	28000000	32000000	30000000	14000000	17000000	13000000	2.36	4583.25	8	30000000	1.46667e+07	1	1	2.04545	0.171168
Q920H8	Hephaestin OS=Rattus norvegicus GN=Heph PE=1 SV=1	1.1236	1	6	1	1	1157	129.511	6.15	73000000	NA	NA	NA	NA	2600000	0.585	566.265	4	2.03333e+07	9950000	1	0.666667	2.04355	0.171008
F1MAN8	Laminin, alpha 5, isoform CRA_a OS=Rattus norvegicus GN=Lama5 PE=1 SV=2	30.8376	81	1626	81	1	3713	403.517	6.68	90000000	150000000	97000000	58000000	42000000	65000000	2.326	30853.4	81	1.12333e+08	55000000	1	1	2.04242	0.170914
A0A0G2JSM3	PDZ and LIM domain 3, isoform CRA_a OS=Rattus norvegicus GN=Pdlim3 PE=1 SV=1	35.7595	8	41	8	1	316	34.396	7.91	NA	NA	15000000	NA	7100000	7600000	1.154	1055.96	8	15000000	7350000	0.333333	0.666667	2.04082	0.17078
A0A0G2JSP8	Creatine kinase M-type OS=Rattus norvegicus GN=Ckm PE=1 SV=1	52.4934	14	70	13	1	381	42.992	7.06	NA	NA	51000000	NA	25000000	NA	2.282	1319.34	14	51000000	25000000	0.333333	0.333333	2.04	0.170711
Q66H98	Serum deprivation-response protein OS=Rattus norvegicus GN=Sdpr PE=1 SV=3	49.1607	19	673	19	1	417	46.358	5.29	510000000	710000000	350000000	280000000	220000000	270000000	4.532	13237.4	19	5.23333e+08	2.56667e+08	1	1	2.03896	0.170624
D3ZQM3	Integrin alpha 3 variant B OS=Rattus norvegicus GN=Itga3 PE=2 SV=1	19.2127	15	242	15	1	1067	119.049	7.14	32000000	41000000	33000000	14000000	20000000	18000000	0.861	4346.02	15	3.53333e+07	1.73333e+07	1	1	2.03846	0.170583
G3V885	Myosin-6 OS=Rattus norvegicus GN=Myh6 PE=1 SV=2	61.4035	119	840	33	1	1938	223.243	5.73	NA	NA	78000000	8000000	100000000	6800000	8.866	16771.4	119	78000000	3.82667e+07	0.333333	1	2.03833	0.170571
P02563	Myosin-6 OS=Rattus norvegicus GN=Myh6 PE=1 SV=2	58.3075	114	787	32	0	1938	223.37	5.74	NA	NA	78000000	8000000	100000000	6800000	7.979	15524.3	114	78000000	3.82667e+07	0.333333	1	2.03833	0.170571
F1LPJ1	Protein Ptprm OS=Rattus norvegicus GN=Ptprm PE=4 SV=2	3.43203	4	30	4	1	1486	167.14	6.65	2800000	2300000	5900000	NA	1800000	NA	0.104	304.446	4	3.66667e+06	1800000	1	0.333333	2.03704	0.170463
G3V765	Envoplakin (Predicted) OS=Rattus norvegicus GN=Evpl PE=1 SV=1	16.5599	29	183	29	1	2029	230.971	6.58	9600000	8700000	6700000	4900000	2400000	5000000	0.428	1668.79	29	8.33333e+06	4100000	1	1	2.03252	0.170085
Q62651	Delta(3,5)-Delta(2,4)-dienoyl-CoA isomerase, mitochondrial OS=Rattus norvegicus GN=Ech1 PE=1 SV=2	23.5474	8	120	8	1	327	36.148	7.99	24000000	23000000	24000000	11000000	14000000	10000000	1.096	1545.02	8	2.36667e+07	1.16667e+07	1	1	2.02857	0.169755
Q62952	Dihydropyrimidinase-related protein 3 OS=Rattus norvegicus GN=Dpysl3 PE=1 SV=2	48.2456	20	465	16	1	570	61.928	6.49	37000000	44000000	36000000	7700000	18000000	32000000	4.179	9924.9	20	39000000	1.92333e+07	1	1	2.02773	0.169684
P11884	Aldehyde dehydrogenase, mitochondrial OS=Rattus norvegicus GN=Aldh2 PE=1 SV=1	58.1888	25	924	1	1	519	56.453	7.05	100000000	240000000	110000000	70000000	78000000	NA	5.952	23154.3	25	150000000	74000000	1	0.666667	2.02703	0.169626
D3ZWQ8	Rho guanine nucleotide exchange factor 6 OS=Rattus norvegicus GN=Arhgef6 PE=1 SV=3	8.9196	6	26	3	1	796	89.72	5.95	NA	8600000	8400000	4200000	NA	NA	0.264	105.139	6	8500000	4200000	0.666667	0.333333	2.02381	0.169356
B1WBM0	Tetraspanin OS=Rattus norvegicus GN=Cd9 PE=1 SV=1	26.5487	6	271	6	1	226	25.198	7.27	270000000	340000000	260000000	100000000	170000000	160000000	7.254	6329.87	6	290000000	1.43333e+08	1	1	2.02326	0.16931
G3V9P0	26S proteasome non-ATPase regulatory subunit 9 OS=Rattus norvegicus GN=Psmd9 PE=1 SV=1	31.5315	6	81	6	1	222	24.8	6.89	17000000	22000000	15000000	4800000	17000000	4900000	2.162	1463.33	6	18000000	8900000	1	1	2.02247	0.169245
G3V8M2	Epithelial-splicing regulatory protein 2 OS=Rattus norvegicus GN=Esrp2 PE=1 SV=1	2.51046	2	25	1	1	717	77.279	6.24	12000000	13000000	9500000	NA	NA	5700000	0.119	389.992	2	11500000	5700000	1	0.333333	2.01754	0.168832
A0A0G2KAM4	Fascin OS=Rattus norvegicus GN=Fscn1 PE=1 SV=1	28.8618	12	210	1	1	492	53.848	7.4	NA	11000000	14000000	4400000	7200000	7000000	1.637	5878.36	12	12500000	6200000	0.666667	1	2.01613	0.168714
Q32Q06	AP-1 complex subunit mu-1 OS=Rattus norvegicus GN=Ap1m1 PE=1 SV=3	38.0615	14	134	10	1	423	48.526	7.3	NA	14000000	7900000	6000000	4100000	6200000	1.543	971.874	14	10950000	5.43333e+06	0.666667	1	2.01534	0.168647
A0A096MKG5	NAD kinase 2, mitochondrial OS=Rattus norvegicus GN=Nadk2 PE=1 SV=1	3.11111	1	19	1	1	450	50.623	7.88	5300000	4700000	4500000	NA	2400000	NA	0.053	332.576	1	4.83333e+06	2400000	1	0.333333	2.01389	0.168526
D3ZC63	Protein Cmpk2 OS=Rattus norvegicus GN=Cmpk2 PE=1 SV=3	23.0425	8	65	8	1	447	50.082	7.24	6800000	8200000	5500000	2700000	4400000	3100000	0.751	1016.9	8	6.83333e+06	3400000	1	1	2.0098	0.168184
F1LNL2	Protein Smarca5 OS=Rattus norvegicus GN=Smarca5 PE=1 SV=2	11.5578	10	48	10	1	995	116.581	8.41	NA	7800000	2200000	6600000	30000000	4000000	30.623	1078.48	4	75000000	3.73333e+07	1	1	2.00893	0.168111
A0A0G2K174	Protein Lmo7 OS=Rattus norvegicus GN=Lmo7 PE=1 SV=1	47.0251	53	1164	32	1	1395	156.668	6.21	74000000	84000000	77000000	32000000	41000000	44000000	2.436	22442.1	53	7.83333e+07	39000000	1	1	2.00855	0.168079
A0A096MIX2	DEAD (Asp-Glu-Ala-Asp) box polypeptide 17, isoform CRA_a OS=Rattus norvegicus GN=Ddx17 PE=1 SV=1	42.9448	26	503	19	1	652	72.599	8.68	14000000	26000000	14000000	8100000	7800000	11000000	3.642	8550.9	26	18000000	8.96667e+06	1	1	2.00743	0.167986
D3ZN05	Protein Lama3 OS=Rattus norvegicus GN=Lama3 PE=4 SV=3	18.1449	23	250	23	1	1725	190.07	8.06	19000000	19000000	20000000	7400000	8500000	13000000	0.632	4313.51	23	1.93333e+07	9.63333e+06	1	1	2.00692	0.167943
B0BNC0	Ckmt2 protein OS=Rattus norvegicus GN=Ckmt2 PE=2 SV=1	44.6301	15	112	13	1	419	47.443	8.4	NA	85000000	NA	4700000	NA	NA	5.043	19860	18	5.26667e+08	2.63333e+08	1	1	2	0.167364
P50753	Troponin T, cardiac muscle OS=Rattus norvegicus GN=Tnnt2 PE=1 SV=2	30.7692	8	42	8	1	299	35.709	4.98	NA	55000000	NA	6200000	5000000	NA	0.413	293.872	3	7600000	3800000	1	0.333333	2	0.167364
Q63530	Phosphotriesterase-related protein OS=Rattus norvegicus GN=Pter PE=2 SV=2	7.16332	2	21	2	1	349	39.12	6.89	6200000	6900000	5500000	3100000	NA	NA	0.202	267.08	2	6200000	3100000	1	0.333333	2	0.167364
G3V6D8	Myosin-3 OS=Rattus norvegicus GN=Myh3 PE=1 SV=1	14.8969	30	175	2	0	1940	223.647	5.81	NA	89000000	NA	NA	4500000	NA	0.514	209.484	8	6600000	3300000	0.333333	0.666667	2	0.167364
P52796	Ephrin-B1 OS=Rattus norvegicus GN=Efnb1 PE=1 SV=1	4.05797	1	9	1	1	345	37.927	9.03	3100000	3700000	NA	1400000	2000000	NA	0.086	75.0712	1	3400000	1700000	0.666667	0.666667	2	0.167364
M0R6T4	Protein Mms19 OS=Rattus norvegicus GN=Mms19 PE=1 SV=1	5.62561	5	20	5	1	1031	112.86	6.24	NA	4400000	NA	1200000	3200000	NA	0.194	74.1466	5	4400000	2200000	0.333333	0.666667	2	0.167364
A0A0G2JZC3	Protein Mrps36 OS=Rattus norvegicus GN=Mrps36 PE=1 SV=1	25.8929	2	6	2	1	112	12.398	10.17	NA	3800000	NA	NA	NA	1900000	0.52	42.4215	2	3800000	1900000	0.333333	0.333333	2	0.167364
F1M7B8	Protein Ube3a OS=Rattus norvegicus GN=Ube3a PE=1 SV=2	1.4977	1	5	1	1	868	99.69	5.07	NA	2400000	NA	430000000	NA	NA	0.033	140.026	1	2400000	430000000	0.333333	0.333333	0.0055814	-0.0399317
P06238	Alpha-2-macroglobulin OS=Rattus norvegicus GN=A2m PE=2 SV=2	46.9429	55	373	19	1	1472	163.682	6.29	NA	NA	3900000	200000000	62000000	31000000	5.457	7867.93	55	3900000	9.76667e+07	0.333333	1	0.0399317	-0.0724095
A0A0G2K6X6	Serine/threonine-protein kinase MARK2 OS=Rattus norvegicus GN=Mark2 PE=1 SV=1	6.83995	4	25	4	1	731	81.969	9.69	2700000	6600000	5200000	NA	130000000	3500000	0.172	40.839	4	4.83333e+06	66750000	1	0.666667	0.0724095	-0.108108
P04916	Retinol-binding protein 4 OS=Rattus norvegicus GN=Rbp4 PE=1 SV=1	32.3383	6	20	6	1	201	23.205	5.99	2000000	NA	NA	24000000	13000000	NA	3.125	316.973	6	2000000	18500000	0.333333	0.666667	0.108108	-0.10904
B6ID08	Metallothionein OS=Rattus norvegicus GN=Mt2A PE=2 SV=1	65.5738	3	43	3	1	61	6.14	7.83	5900000	20000000	32000000	250000000	71000000	210000000	5.813	1985.62	3	19300000	177000000	1	1	0.10904	-0.109589
D3ZRN3	Protein Actbl2 OS=Rattus norvegicus GN=Actbl2 PE=1 SV=1	24.2021	10	1555	3	1	376	41.936	5.49	5600000000	5100000000	2800000000	180000000	190000000	3500000000	0.528	757.486	6	3200000	29200000	1	1	0.109589	-0.121519
F1M8F5	Protein LOC100909605 OS=Rattus norvegicus GN=LOC100909605 PE=3 SV=3	11.9512	5	55	4	0	410	46.328	7.8	NA	9600000	NA	120000000	81000000	36000000	0.719	1114.28	5	9600000	79000000	0.333333	1	0.121519	-0.12957
P14480	Fibrinogen beta chain OS=Rattus norvegicus GN=Fgb PE=1 SV=4	67.2234	30	762	30	1	479	54.201	7.78	65000000	84000000	92000000	1200000000	400000000	260000000	19.691	12509.1	30	8.03333e+07	620000000	1	1	0.12957	-0.133537
P01015	Angiotensinogen OS=Rattus norvegicus GN=Agt PE=1 SV=1	40.4612	16	85	16	1	477	51.949	5.57	6600000	NA	8000000	120000000	29000000	15000000	4.505	1369.76	16	7300000	5.46667e+07	0.666667	1	0.133537	-0.140476
P02680	Fibrinogen gamma chain OS=Rattus norvegicus GN=Fgg PE=1 SV=3	62.6966	26	731	26	1	445	50.6	5.96	56000000	80000000	100000000	1100000000	350000000	230000000	19.209	15840.6	26	7.86667e+07	560000000	1	1	0.140476	-0.148338
A0A0G2JWA5	Sarcolemmal membrane-associated protein OS=Rattus norvegicus GN=Slmap PE=1 SV=1	5.07426	4	30	4	1	808	92.895	5.26	5400000	NA	6200000	2700000	110000000	4600000	0.122	488.798	4	5800000	39100000	0.666667	1	0.148338	-0.148925
Q7TQ70	Ac1873 OS=Rattus norvegicus GN=Fga PE=1 SV=1	45.5243	30	534	30	1	782	86.603	5.74	64000000	93000000	120000000	1200000000	400000000	260000000	5.646	9971.57	30	9.23333e+07	620000000	1	1	0.148925	-0.154696
Q4V8K1	Metalloreductase STEAP4 OS=Rattus norvegicus GN=Steap4 PE=1 SV=1	15.1064	6	34	6	1	470	52.731	9.13	NA	NA	1400000	10000000	NA	8100000	0.54	327.183	6	1400000	9050000	0.333333	0.666667	0.154696	-0.15942
D4A7R0	Signal recognition particle subunit SRP72 OS=Rattus norvegicus GN=Srp72 PE=1 SV=2	23.4328	13	83	9	1	670	74.606	9.17	NA	NA	1100000	NA	NA	6900000	0.759	430.853	13	1100000	6900000	0.333333	0.333333	0.15942	-0.161062
A0A0G2K9B1	Protein LOC299282 OS=Rattus norvegicus GN=LOC299282 PE=1 SV=1	43.75	19	408	19	1	432	48.342	5.57	50000000	63000000	69000000	610000000	400000000	120000000	7.733	8421.22	19	6.06667e+07	3.76667e+08	1	1	0.161062	-0.161627
G3V8L7	Integrin alpha M OS=Rattus norvegicus GN=Itgam PE=1 SV=1	32.841	29	167	29	1	1151	127.112	6.76	1800000	5700000	8000000	40000000	5900000	50000000	1.705	3639.05	29	5.16667e+06	3.19667e+07	1	1	0.161627	-0.17016
Q4G075	Leukocyte elastase inhibitor A OS=Rattus norvegicus GN=Serpinb1a PE=1 SV=1	47.4934	19	220	14	1	379	42.7	6.32	NA	8000000	360000000	17000000	26000000	9500000	9	6640.19	10	460000000	2.70333e+09	1	1	0.17016	-0.171429
Q5XIE8	Integral membrane protein 2B OS=Rattus norvegicus GN=Itm2b PE=2 SV=1	4.88722	1	14	1	1	266	30.294	5.3	NA	2800000	2000000	NA	14000000	NA	0.245	129.319	1	2400000	14000000	0.666667	0.333333	0.171429	-0.17378
A0A0H2UHF8	Alpha-1-acid glycoprotein OS=Rattus norvegicus GN=Orm1 PE=1 SV=1	30.2128	7	294	7	1	235	26.694	6.54	95000000	93000000	97000000	850000000	540000000	250000000	5.494	5437.55	7	95000000	5.46667e+08	1	1	0.17378	-0.174
P30152	Neutrophil gelatinase-associated lipocalin OS=Rattus norvegicus GN=Lcn2 PE=1 SV=2	19.1919	3	54	3	1	198	22.461	7.83	NA	63000000	53000000	520000000	150000000	330000000	1.424	639.852	3	58000000	3.33333e+08	0.666667	1	0.174	-0.175532
Q9QXY4	Opioid growth factor receptor OS=Rattus norvegicus GN=Ogfr PE=1 SV=1	4.31034	2	21	2	1	580	64.688	4.69	NA	950000	700000	NA	NA	4700000	0.322	194.772	2	825000	4700000	0.666667	0.333333	0.175532	-0.180656
D4A488	Elastase 2, neutrophil (Predicted) OS=Rattus norvegicus GN=Elane PE=1 SV=1	28.4133	8	100	8	1	271	29.538	9.28	5100000	20000000	30000000	150000000	25000000	130000000	6.017	2366.07	8	1.83667e+07	1.01667e+08	1	1	0.180656	-0.183333
A0A0G2K3L9	Protein Ppfia1 OS=Rattus norvegicus GN=Ppfia1 PE=1 SV=1	3.26264	4	27	3	1	1226	137.901	6.37	2200000	NA	NA	12000000	NA	NA	0.087	314.701	4	2200000	12000000	0.333333	0.333333	0.183333	-0.184141
P50115	Protein S100-A8 OS=Rattus norvegicus GN=S100a8 PE=1 SV=3	58.427	6	406	6	1	89	10.232	6.05	260000000	730000000	1100000000	5800000000	850000000	4700000000	20.544	8213.79	6	6.96667e+08	3.78333e+09	1	1	0.184141	-0.195195
F1LR92	Serine protease inhibitor A3M OS=Rattus norvegicus GN=Serpina3m PE=1 SV=3	26.969	10	60	9	1	419	46.811	5.66	5900000	5300000	8300000	55000000	40000000	4900000	1.371	1002.82	10	6500000	33300000	1	1	0.195195	-0.19646
Q62715	Neutrophil antibiotic peptide NP-2 OS=Rattus norvegicus GN=Defa PE=1 SV=1	8.51064	1	20	1	1	94	10.295	7.65	NA	150000000	72000000	440000000	NA	690000000	0.389	323.25	1	111000000	565000000	0.666667	0.666667	0.19646	-0.202229
P08932	T-kininogen 2 OS=Rattus norvegicus PE=1 SV=2	65.814	23	798	8	1	430	47.673	6.35	38000000	45000000	44000000	320000000	220000000	88000000	28.427	16310.3	23	4.23333e+07	2.09333e+08	1	1	0.202229	-0.203194
G3V885	Myosin-6 OS=Rattus norvegicus GN=Myh6 PE=1 SV=2	61.4035	119	840	33	1	1938	223.243	5.73	NA	480000000	NA	70000000	25000000	NA	3.642	1680.45	6	7.63333e+06	3.75667e+07	1	1	0.203194	-0.205
D3ZBS2	Inter-alpha-trypsin inhibitor heavy chain H3 OS=Rattus norvegicus GN=Itih3 PE=1 SV=3	27.283	18	183	18	1	887	99.006	6.32	8000000	11000000	22000000	110000000	69000000	21000000	1.512	2648.41	18	1.36667e+07	6.66667e+07	1	1	0.205	-0.205534
Q4G075	Leukocyte elastase inhibitor A OS=Rattus norvegicus GN=Serpinb1a PE=1 SV=1	47.4934	19	220	14	1	379	42.7	6.32	13000000	19000000	20000000	190000000	40000000	23000000	9.857	4598.4	19	1.73333e+07	8.43333e+07	1	1	0.205534	-0.208494
A0A0G2K1T8	Protein LOC299282 OS=Rattus norvegicus GN=LOC299282 PE=1 SV=1	46.6346	15	422	12	0	416	46.276	5.08	54000000	55000000	53000000	400000000	280000000	97000000	7.003	9704.59	15	54000000	259000000	1	1	0.208494	-0.212264
A0A0H2UI19	Coagulation factor XII OS=Rattus norvegicus GN=F12 PE=1 SV=1	18.0763	10	37	10	1	603	66.674	7.3	10000000	7400000	18000000	5700000	NA	NA	2.162	3809.85	13	22500000	106000000	1	1	0.212264	-0.217593
P20059	Hemopexin OS=Rattus norvegicus GN=Hpx PE=1 SV=3	61.3043	25	1986	25	1	460	51.318	7.65	290000000	340000000	310000000	2600000000	1200000000	520000000	15.927	44319.3	25	3.13333e+08	1440000000	1	1	0.217593	-0.220597
A0A0G2JXI9	Histone H2B OS=Rattus norvegicus GN=Hist1h2bo PE=3 SV=1	45.6522	7	802	2	1	138	15.469	10.24	NA	3000000	1400000000	5500000000	860000000	NA	4.623	24480.3	7	701500000	3180000000	0.666667	0.666667	0.220597	-0.22193
D3ZFH5	Protein Itih2 OS=Rattus norvegicus GN=Itih2 PE=1 SV=3	27.724	17	131	17	1	826	92.311	6.7	4700000	8600000	12000000	70000000	29000000	15000000	1.492	2367.98	17	8.43333e+06	38000000	1	1	0.22193	-0.222026
Q5M7V3	LOC367586 protein OS=Rattus norvegicus GN=LOC367586 PE=2 SV=1	50.7592	18	542	2	1	461	50.916	8.06	8400000	16000000	26000000	48000000	140000000	39000000	11.409	8544.64	18	16800000	7.56667e+07	1	1	0.222026	-0.22575
Q4VBH1	Ighg protein OS=Rattus norvegicus GN=Ighg PE=1 SV=1	26.7666	8	196	5	1	467	51.618	6.6	33000000	NA	450000000	8000000	NA	NA	0.874	671.568	6	4.26667e+06	18900000	1	1	0.22575	-0.227129
B2RYM3	Inter-alpha trypsin inhibitor, heavy chain 1 (Predicted), isoform CRA_a OS=Rattus norvegicus GN=Itih1 PE=1 SV=1	21.0177	14	54	14	1	904	100.526	6.86	4000000	4100000	6300000	38000000	20000000	5400000	0.778	1316.74	14	4800000	2.11333e+07	1	1	0.227129	-0.22837
P04157	Receptor-type tyrosine-protein phosphatase C OS=Rattus norvegicus GN=Ptprc PE=1 SV=2	19.4815	21	178	21	1	1273	143.179	5.86	7800000	15000000	16000000	140000000	5900000	24000000	0.901	2737.2	21	1.29333e+07	5.66333e+07	1	1	0.22837	-0.235246
P20761	Ig gamma-2B chain C region OS=Rattus norvegicus GN=Igh-1a PE=1 SV=1	29.7297	7	251	7	1	333	36.474	7.64	110000000	140000000	37000000	340000000	780000000	100000000	7.799	4650.26	7	9.56667e+07	4.06667e+08	1	1	0.235246	-0.236324
Q5M891	C4b-binding protein alpha chain OS=Rattus norvegicus GN=C4bpa PE=1 SV=1	31.7804	17	78	17	1	601	67.158	7.78	3600000	NA	NA	22000000	18000000	5700000	1.488	771.208	17	3600000	1.52333e+07	0.333333	1	0.236324	-0.238235
P20762	Ig gamma-2C chain C region OS=Rattus norvegicus PE=2 SV=1	39.2097	9	71	9	1	329	36.548	8.22	8900000	5400000	10000000	39000000	52000000	11000000	2.728	1334.66	9	8100000	34000000	1	1	0.238235	-0.239313
D4A4K4	Protein Vps13c OS=Rattus norvegicus GN=Vps13c PE=1 SV=2	2.24659	7	32	7	1	3739	418.359	6.84	NA	14000000	6900000	66000000	49000000	16000000	0.058	134.562	7	10450000	4.36667e+07	0.666667	1	0.239313	-0.240291
Q5I0E1	Leucine-rich alpha-2-glycoprotein 1 OS=Rattus norvegicus GN=Lrg1 PE=2 SV=1	18.3735	5	22	5	1	332	36.297	7.23	NA	NA	21000000	NA	2100000	NA	9.502	26404.9	50	33000000	1.37333e+08	1	1	0.240291	-0.240437
M0R5V7	Murinoglobulin-2 OS=Rattus norvegicus GN=Mug2 PE=1 SV=2	33.4066	35	1093	5	0	1365	151.867	6.77	16000000	16000000	12000000	100000000	60000000	23000000	3.68	19416.8	35	1.46667e+07	61000000	1	1	0.240437	-0.245161
F1LZH0	Protein LOC100912707 OS=Rattus norvegicus GN=LOC100912707 PE=1 SV=2	17.8862	2	15	2	1	123	13.602	7.99	NA	NA	19000000	25000000	130000000	NA	0.585	187.358	2	19000000	77500000	0.333333	0.666667	0.245161	-0.24537
P02770	Serum albumin OS=Rattus norvegicus GN=Alb PE=1 SV=2	82.4013	55	6654	2	1	608	68.686	6.48	2500000000	1300000000	1500000000	NA	12000000000	2400000000	71.79	135020	55	1.76667e+09	7200000000	1	0.666667	0.24537	-0.250435
P31211	Corticosteroid-binding globulin OS=Rattus norvegicus GN=Serpina6 PE=1 SV=2	13.3838	4	22	4	1	396	44.642	4.98	2500000	2100000	NA	11000000	7300000	NA	0.616	357.282	4	2300000	9150000	0.666667	0.666667	0.251366	-0.250435
Q63581	Rat T-kininogen (T-KG) OS=Rattus norvegicus PE=4 SV=1	41.8605	16	626	5	0	430	47.588	6.52	78000000	100000000	110000000	580000000	390000000	180000000	11.69	14597.9	16	96000000	3.83333e+08	1	1	0.250435	-0.251366
Q5PQU1	Kininogen 1 OS=Rattus norvegicus GN=Kng1 PE=2 SV=1	49.7674	18	716	7	1	430	47.734	6.74	78000000	100000000	110000000	580000000	390000000	180000000	25.827	15634.9	18	96000000	3.83333e+08	1	1	0.250435	-0.255773
P04639	Apolipoprotein A-I OS=Rattus norvegicus GN=Apoa1 PE=1 SV=2	63.3205	16	442	16	1	259	30.043	5.74	49000000	52000000	43000000	370000000	130000000	63000000	13.925	6930.53	16	48000000	1.87667e+08	1	1	0.255773	-0.257453
A0A0G2JUP5	Protein LOC297568 OS=Rattus norvegicus GN=Mug1 PE=1 SV=1	38.8966	44	1419	5	0	1450	161.262	6.33	27000000	32000000	36000000	210000000	120000000	39000000	7.237	24927.1	44	3.16667e+07	123000000	1	1	0.257453	-0.257895
A0A0G2K151	Apolipoprotein E OS=Rattus norvegicus GN=Apoe PE=1 SV=1	42.6184	16	252	16	1	359	41.174	5.83	29000000	32000000	37000000	280000000	59000000	41000000	5.529	5832.98	16	3.26667e+07	1.26667e+08	1	1	0.257895	-0.260739
D3ZMI6	Olfactomedin 4 (Predicted) OS=Rattus norvegicus GN=Olfm4 PE=1 SV=1	22.8963	9	51	9	1	511	57.863	5.87	NA	NA	8700000	44000000	9100000	47000000	0.968	1183.63	9	8700000	3.33667e+07	0.333333	1	0.260739	-0.261719
P06866	Haptoglobin OS=Rattus norvegicus GN=Hp PE=1 SV=3	52.1614	20	588	20	1	347	38.539	6.54	190000000	270000000	210000000	1800000000	480000000	280000000	9.857	9420.12	20	2.23333e+08	8.53333e+08	1	1	0.261719	-0.265686
G3V9Q7	Cathepsin G OS=Rattus norvegicus GN=Ctsg PE=1 SV=1	56	11	164	11	1	250	27.786	10.54	7200000	19000000	28000000	100000000	14000000	90000000	14.849	3668	11	1.80667e+07	68000000	1	1	0.265686	-0.266129
Q5I0M1	Apolipoprotein H OS=Rattus norvegicus GN=Apoh PE=1 SV=1	48.4058	14	260	14	1	345	38.432	8.21	31000000	36000000	39000000	230000000	120000000	48000000	5.529	2477.71	14	3.53333e+07	1.32667e+08	1	1	0.266332	-0.266129
A0A0G2K625	Protein LOC297568 OS=Rattus norvegicus GN=Mug1 PE=1 SV=1	39.0463	47	1472	6	0	1447	160.9	6.25	29000000	33000000	37000000	210000000	120000000	42000000	8.522	26051.2	47	33000000	124000000	1	1	0.266129	-0.266332
D4A6E3	Protein LOC297568 OS=Rattus norvegicus GN=Mug1 PE=1 SV=2	41.0894	49	1520	10	0	1487	165.221	6.01	29000000	33000000	37000000	210000000	120000000	42000000	9.248	26465.6	49	33000000	124000000	1	1	0.266129	-0.266667
Q6LE95	Kininogen OS=Rattus norvegicus GN=Kng1l1 PE=4 SV=1	50	4	96	2	1	56	6.01	8.98	7200000	17000000	15000000	48000000	65000000	34000000	14.849	769.241	4	1.30667e+07	49000000	1	1	0.266667	-0.268116
O55006	Protein RoBo-1 OS=Rattus norvegicus PE=1 SV=1	19.5833	4	91	4	1	240	26.17	7.33	12000000	28000000	34000000	130000000	36000000	110000000	1.276	3018.99	4	2.46667e+07	92000000	1	1	0.268116	-0.271186
G3V8T9	Apoptosis regulator BAX OS=Rattus norvegicus GN=Bax PE=1 SV=1	24.4792	4	23	4	1	192	21.431	5.01	2800000	3600000	NA	7600000	NA	16000000	0.931	436.404	4	3200000	11800000	0.666667	0.666667	0.271186	-0.272222
A0A0G2K8K3	Heparin cofactor 2 OS=Rattus norvegicus GN=Serpind1 PE=1 SV=1	12.1331	6	45	6	1	511	57.986	6.73	3000000	3200000	3600000	14000000	10000000	NA	0.401	721.51	6	3.26667e+06	12000000	1	0.666667	0.272222	-0.277778
P97569	Kallistatin OS=Rattus norvegicus PE=2 SV=1	26.7139	9	47	9	1	423	47.991	8.53	6000000	6900000	4600000	25000000	17000000	NA	1.326	500.737	9	5.83333e+06	21000000	1	0.666667	0.277778	-0.285
Q6P734	Plasma protease C1 inhibitor OS=Rattus norvegicus GN=Serping1 PE=2 SV=1	33.3333	12	80	12	1	504	55.576	5.83	6900000	8600000	7300000	44000000	20000000	16000000	1.762	1434.4	12	7600000	2.66667e+07	1	1	0.285	-0.285714
Q66H59	N-acetylneuraminate lyase OS=Rattus norvegicus GN=Npl PE=2 SV=1	13.125	2	27	2	1	320	35.093	6.93	NA	NA	1500000	4300000	NA	6200000	0.222	268.161	2	1500000	5250000	0.333333	0.666667	0.285714	-0.290179
G3V6B0	Protein LOC103689979 OS=Rattus norvegicus GN=Pdxdc1 PE=1 SV=1	8.40764	5	49	5	1	785	86.916	5.53	NA	8700000	11000000	5800000	89000000	4300000	0.243	556.736	5	9850000	3.30333e+07	0.666667	1	0.298184	-0.299099
Q4QQV8	Charged multivesicular body protein 5 OS=Rattus norvegicus GN=Chmp5 PE=2 SV=1	20.0913	3	31	3	1	219	24.56	4.79	6300000	6600000	12000000	51000000	NA	4500000	0.638	339.206	3	8300000	27750000	1	0.666667	0.299099	-0.301961
Q63166	Dynein-like protein 3 (Fragment) OS=Rattus norvegicus GN=Dnah3 PE=2 SV=1	12.7119	1	14	1	1	118	12.772	8.34	6800000	10000000	14000000	NA	NA	34000000	0.259	0	1	1.02667e+07	34000000	1	0.333333	0.301961	-0.302083
F1M0U4	Uncharacterized protein OS=Rattus norvegicus PE=4 SV=3	9.16667	1	15	1	1	120	13.432	7.87	3700000	NA	5000000	15000000	20000000	8200000	0.292	0	1	4350000	14400000	0.666667	1	0.302083	-0.304786
Q63041	Alpha-1-macroglobulin OS=Rattus norvegicus GN=A1m PE=1 SV=1	56.8667	59	1143	59	1	1500	167.019	6.9	91000000	110000000	41000000	490000000	210000000	94000000	8.765	17583.6	59	8.06667e+07	2.64667e+08	1	1	0.304786	-0.305556
A0A0G2K1A2	Protein Mpo OS=Rattus norvegicus GN=Mpo PE=1 SV=1	44.7075	28	454	25	1	718	80.832	9.52	18000000	51000000	74000000	170000000	48000000	250000000	2.609	7753.47	28	4.76667e+07	156000000	1	1	0.305556	-0.30721
D3ZY96	Neutrophilic granule protein (Predicted) OS=Rattus norvegicus GN=Ngp PE=1 SV=1	68.4524	15	267	15	1	168	19.369	8.02	34000000	110000000	150000000	530000000	57000000	370000000	24.119	4917.45	15	98000000	319000000	1	1	0.30721	-0.308219
P20767	Ig lambda-2 chain C region OS=Rattus norvegicus PE=4 SV=1	46.1538	4	97	4	1	104	11.311	5.99	11000000	18000000	16000000	28000000	95000000	23000000	3.217	1361.21	4	15000000	4.86667e+07	1	1	0.308219	-0.309434
P55159	Serum paraoxonase/arylesterase 1 OS=Rattus norvegicus GN=Pon1 PE=1 SV=3	15.2113	5	28	5	1	355	39.333	5.22	NA	4800000	3400000	18000000	8500000	NA	1.081	288.895	5	4100000	13250000	0.666667	0.666667	0.309434	-0.309884
Q5U2V4	Phospholipase B-like 1 OS=Rattus norvegicus GN=Plbd1 PE=2 SV=1	27.6364	12	128	12	1	550	62.987	8.6	2800000	14000000	18000000	54000000	8300000	50000000	1.154	2627.54	12	11600000	3.74333e+07	1	1	0.309884	-0.313364
P06238	Alpha-2-macroglobulin OS=Rattus norvegicus GN=A2m PE=2 SV=2	46.9429	55	373	19	1	1472	163.682	6.29	NA	NA	300000000	8100000	NA	NA	1.783	3598.11	10	2.26667e+07	7.23333e+07	1	1	0.313364	-0.313725
A0A0G2K290	Uncharacterized protein OS=Rattus norvegicus PE=4 SV=1	30.6452	3	71	3	0	124	13.896	8.16	17000000	25000000	38000000	64000000	150000000	41000000	1.512	2048.43	3	2.66667e+07	85000000	1	1	0.313725	-0.318584
Q5EBC0	Inter alpha-trypsin inhibitor, heavy chain 4 OS=Rattus norvegicus GN=Itih4 PE=1 SV=1	54.5552	39	528	39	1	933	103.691	6.2	36000000	54000000	57000000	270000000	120000000	45000000	6.804	8048.83	39	49000000	145000000	1	1	0.337931	-0.339623
P06762	Heme oxygenase 1 OS=Rattus norvegicus GN=Hmox1 PE=1 SV=1	32.872	5	16	5	1	289	32.985	6.54	NA	NA	1800000	3800000	5100000	7000000	1.081	159.922	5	1800000	5300000	0.333333	1	0.339623	-0.342679
Q01177	Plasminogen OS=Rattus norvegicus GN=Plg PE=2 SV=2	60.9606	39	721	39	1	812	90.477	7.08	36000000	37000000	37000000	150000000	120000000	51000000	6.644	12167.2	39	3.66667e+07	107000000	1	1	0.342679	-0.342857
Q68FX4	Hematopoietic cell specific Lyn substrate 1 OS=Rattus norvegicus GN=Hcls1 PE=1 SV=1	19.7479	8	87	8	1	476	52.791	4.94	4000000	7800000	9800000	21000000	12000000	30000000	0.84	785.233	8	7200000	21000000	1	1	0.342857	-0.345
A0A096XKT9	NADH-ubiquinone oxidoreductase chain 5 OS=Rattus norvegicus GN=ND5 PE=3 SV=1	7.71757	3	18	3	1	609	68.538	9.26	NA	3800000	10000000	NA	20000000	NA	0.292	166.406	3	6900000	20000000	0.666667	0.333333	0.345	-0.345455
J7P1Z1	Interferon-gamma-inducible GTPase Ifggd2 protein OS=Rattus norvegicus GN=Irgm2 PE=4 SV=1	22.25	7	28	1	1	400	45.472	6.27	3800000	NA	NA	NA	NA	11000000	1.154	145.055	7	3800000	11000000	0.333333	0.333333	0.345455	-0.347458
A0A0G2JZ73	Alpha-1-antiproteinase OS=Rattus norvegicus GN=Serpina1 PE=1 SV=1	48.4337	17	927	17	1	415	46.605	6.34	230000000	290000000	300000000	1100000000	870000000	390000000	8.284	16870.9	17	2.73333e+08	7.86667e+08	1	1	0.347458	-0.352174
A0A0G2JSV6	Protein Hba-a2 OS=Rattus norvegicus GN=Hba-a2 PE=1 SV=1	88.7324	12	1359	1	1	142	15.275	8.31	94000000	65000000	84000000	140000000	320000000	NA	145.78	28961.3	12	81000000	230000000	1	0.666667	0.352174	-0.3528
B2RYB8	Integrin beta OS=Rattus norvegicus GN=Itgb2 PE=1 SV=1	47.3958	31	373	31	1	768	84.762	7.23	9100000	17000000	18000000	44000000	14000000	67000000	2.34	6785.23	31	14700000	4.16667e+07	1	1	0.3528	-0.353659
P22791	Hydroxymethylglutaryl-CoA synthase, mitochondrial OS=Rattus norvegicus GN=Hmgcs2 PE=1 SV=1	7.08661	4	13	4	1	508	56.876	8.68	NA	NA	2900000	NA	8200000	NA	0.274	133.544	4	2900000	8200000	0.333333	0.333333	0.353659	-0.357868
H6X2V7	Pentaxin OS=Rattus norvegicus GN=crp PE=3 SV=1	35.2174	5	107	5	1	230	25.45	5.11	47000000	54000000	40000000	210000000	130000000	54000000	6.943	1680.95	5	47000000	1.31333e+08	1	1	0.357868	-0.358333
Q5U2V8	ER membrane protein complex subunit 3 OS=Rattus norvegicus GN=Emc3 PE=2 SV=3	17.2414	4	25	4	1	261	29.96	6.81	NA	2400000	1900000	NA	NA	6000000	0.719	85.5302	4	2150000	6000000	0.666667	0.333333	0.358333	-0.36036
D3ZSY4	Eosinophil peroxidase (Predicted) OS=Rattus norvegicus GN=Epx PE=1 SV=1	27.5524	18	109	15	1	715	81.23	10.14	3200000	NA	4800000	NA	21000000	1200000	1.025	987.347	18	4000000	11100000	0.666667	0.666667	0.36036	-0.360784
M0R553	Dimethylaniline monooxygenase [N-oxide-forming] OS=Rattus norvegicus GN=Fmo6 PE=3 SV=1	9.02256	4	15	3	0	532	60.077	7.39	6000000	7400000	5000000	NA	17000000	NA	0.403	97.368	4	6.13333e+06	17000000	1	0.333333	0.360784	-0.36383
Q68FY4	Group specific component OS=Rattus norvegicus GN=Gc PE=1 SV=1	58.4034	25	646	25	1	476	53.483	5.86	92000000	120000000	130000000	520000000	310000000	110000000	7.254	14150.7	25	114000000	3.13333e+08	1	1	0.36383	-0.364807
A0A0G2K3S3	Uncharacterized protein OS=Rattus norvegicus PE=4 SV=1	9.84848	1	27	1	1	132	14.815	9.1	23000000	27000000	35000000	65000000	130000000	38000000	0.292	1171.61	1	2.83333e+07	7.76667e+07	1	1	0.364807	-0.364865
M0RA79	Protein LOC691828 OS=Rattus norvegicus GN=LOC691828 PE=1 SV=1	61.6162	5	41	5	1	99	10.952	7.94	16000000	11000000	NA	31000000	68000000	12000000	3.217	1114.7	5	13500000	37000000	0.666667	1	0.364865	-0.367925
M0RBF1	Complement C3 OS=Rattus norvegicus GN=C3 PE=1 SV=1	61.5153	88	2401	88	1	1663	186.206	6.47	110000000	160000000	120000000	560000000	340000000	160000000	9.366	40962.2	88	130000000	3.53333e+08	1	1	0.367925	-0.368771
W8BZ34	DDX3Y OS=Rattus norvegicus GN=DDX3Y PE=3 SV=1	34.4985	21	301	2	1	658	73.284	7.75	NA	3700000	NA	12000000	2100000	16000000	1.913	4983.52	21	3700000	1.00333e+07	0.333333	1	0.368771	-0.369565
Q62703	Reticulocalbin-2 OS=Rattus norvegicus GN=Rcn2 PE=1 SV=2	28.125	7	46	7	1	320	37.41	4.41	4100000	2800000	3300000	NA	11000000	7400000	1.239	767.495	7	3400000	9200000	1	0.666667	0.369565	-0.371429
Q3KR94	Protein Vtn OS=Rattus norvegicus GN=Vtn PE=1 SV=1	29.9163	11	176	11	1	478	54.69	6.05	16000000	19000000	17000000	85000000	37000000	18000000	2.415	3392.85	11	1.73333e+07	4.66667e+07	1	1	0.371429	-0.373684
F1LTN6	Protein Igkc OS=Rattus norvegicus GN=Igkc PE=1 SV=2	41.2281	9	260	5	0	228	24.899	5.63	130000000	160000000	65000000	120000000	620000000	210000000	6.499	5656.35	9	1.18333e+08	3.16667e+08	1	1	0.373684	-0.375
D3ZE97	Protein Rpl21-ps4 OS=Rattus norvegicus GN=Rpl21-ps4 PE=4 SV=1	14.375	2	28	2	1	160	18.441	10.54	12000000	NA	NA	NA	NA	32000000	0.501	474.112	2	12000000	32000000	0.333333	0.333333	0.375	-0.376068
Q62737	Cytochrome b-245 light chain OS=Rattus norvegicus GN=Cyba PE=1 SV=3	20.3125	4	98	4	1	192	20.737	9.23	12000000	20000000	12000000	54000000	12000000	51000000	1.61	957.229	4	1.46667e+07	39000000	1	1	0.376068	-0.376232
O88752	Epsilon 1 globin OS=Rattus norvegicus GN=Hbe1 PE=1 SV=1	12.2449	2	189	1	1	147	16.094	8.18	9900000	NA	13000000	9300000	38000000	44000000	1.031	2859.79	2	11450000	3.04333e+07	0.666667	1	0.376232	-0.377586
Q7TMB9	Ab1-021 OS=Rattus norvegicus GN=LOC299282 PE=2 SV=1	38.4615	18	508	13	0	611	68.18	5.45	72000000	78000000	69000000	280000000	230000000	70000000	3.566	10899.6	18	73000000	1.93333e+08	1	1	0.377586	-0.378893
P10959	Carboxylesterase 1C OS=Rattus norvegicus GN=Ces1c PE=1 SV=3	28.9617	16	207	2	1	549	60.136	5.73	4800000	10000000	7100000	32000000	17000000	8800000	3.532	2836.55	16	7300000	1.92667e+07	1	1	0.378893	-0.38
P01836	Ig kappa chain C region, A allele OS=Rattus norvegicus PE=1 SV=1	43.3962	5	122	1	1	106	11.725	5.16	NA	NA	190000000	500000000	NA	NA	6.743	3079.61	5	190000000	500000000	0.333333	0.333333	0.38	-0.381481
P55314	Complement component C8 beta chain OS=Rattus norvegicus GN=C8b PE=2 SV=2	24.618	11	36	11	1	589	66.623	8.05	4400000	5900000	NA	15000000	12000000	NA	0.778	421.055	11	5150000	13500000	0.666667	0.666667	0.381481	-0.383333
D4A834	Phospholipid phosphatase-related protein type 1 OS=Rattus norvegicus GN=Prg3 PE=1 SV=1	20.4444	3	23	3	1	225	25.517	6.6	7000000	5600000	5800000	NA	16000000	NA	0.638	560.124	3	6.13333e+06	16000000	1	0.333333	0.383333	-0.383481
A0A0G2JSH5	Serum albumin OS=Rattus norvegicus GN=Alb PE=1 SV=1	82.4013	55	6654	2	1	608	68.714	6.48	3300000000	7100000000	2600000000	17000000000	NA	5600000000	71.79	133929	55	4.33333e+09	11300000000	1	0.666667	0.383481	-0.383721
Q9WTV1	Chitinase-3-like protein 1 OS=Rattus norvegicus GN=Chi3l1 PE=2 SV=3	43.0446	13	70	13	1	381	42.365	8.78	NA	12000000	10000000	27000000	32000000	27000000	2.455	1271.8	13	11000000	2.86667e+07	0.666667	1	0.383721	-0.385281
Q05982	Nucleoside diphosphate kinase A OS=Rattus norvegicus GN=Nme1 PE=1 SV=1	79.6053	10	338	5	1	152	17.182	6.33	6700000	5200000	5900000	16000000	8200000	22000000	9	6405.17	10	5.93333e+06	15400000	1	1	0.385281	-0.388889
A0A096MK41	Protein LOC259246 OS=Rattus norvegicus GN=LOC259245 PE=1 SV=1	13.8122	2	18	2	1	181	20.905	5.92	4000000	NA	1600000	NA	7200000	NA	0.585	167.459	2	2800000	7200000	0.666667	0.333333	0.388889	-0.391489
D4A7L6	Protein Rpia OS=Rattus norvegicus GN=Rpia PE=1 SV=1	29.703	7	56	7	1	303	32.452	8.02	4200000	1500000	3500000	11000000	3300000	9200000	1.371	499.249	7	3.06667e+06	7.83333e+06	1	1	0.391489	-0.391586
Q63910	Alpha globin OS=Rattus norvegicus GN=Hba-a3 PE=1 SV=2	61.2676	8	193	6	1	142	15.515	8.22	8300000	NA	3800000	8900000	22000000	NA	9	1233.24	8	6050000	15450000	0.666667	0.666667	0.391586	-0.392857
P08050	Gap junction alpha-1 protein OS=Rattus norvegicus GN=Gja1 PE=1 SV=2	2.09424	1	18	1	1	382	43.004	8.76	NA	2200000	NA	5600000	NA	NA	0.179	38.5879	1	2200000	5600000	0.333333	0.333333	0.392857	-0.395556
G3V811	Coagulation factor XIII A chain OS=Rattus norvegicus GN=F13a1 PE=1 SV=1	16.9399	11	51	11	1	732	83.002	5.62	6200000	4900000	6700000	18000000	13000000	14000000	0.684	260.53	11	5.93333e+06	15000000	1	1	0.395556	-0.395604
B5DF36	Placenta-specific 8 OS=Rattus norvegicus GN=Plac8 PE=1 SV=1	13.3929	1	26	1	1	112	12.319	7.61	90000000	140000000	130000000	370000000	140000000	400000000	0.585	1209.31	1	120000000	3.03333e+08	1	1	0.395604	-0.396226
D4ABA5	Protein Smtn OS=Rattus norvegicus GN=Smtn PE=1 SV=1	12.0521	10	42	10	1	921	99.818	8.72	2100000	NA	NA	NA	5300000	NA	0.365	346.976	10	2100000	5300000	0.333333	0.333333	0.396226	-0.396842
B2RZB2	Uncharacterized protein OS=Rattus norvegicus PE=2 SV=1	42.0601	9	250	5	0	233	25.589	6.76	130000000	160000000	87000000	160000000	580000000	210000000	6.499	5533.25	9	1.25667e+08	3.16667e+08	1	1	0.396842	-0.4
P05544	Serine protease inhibitor A3L OS=Rattus norvegicus GN=Serpina3l PE=1 SV=3	47.6998	18	490	12	1	413	46.248	5.67	72000000	78000000	69000000	250000000	230000000	65000000	6.43	8504.13	18	73000000	1.81667e+08	1	1	0.401835	-0.4
P11167	Solute carrier family 2, facilitated glucose transporter member 1 OS=Rattus norvegicus GN=Slc2a1 PE=1 SV=1	1.62602	1	19	1	1	492	53.927	8.72	900000	1200000	1100000	2800000	1300000	3900000	0.105	222.52	1	1.06667e+06	2.66667e+06	1	1	0.4	-0.401835
D3ZBB3	Protein Tmem47 OS=Rattus norvegicus GN=Tmem47 PE=1 SV=1	14.9171	3	17	3	1	181	19.955	6.73	NA	6600000	4600000	NA	14000000	NA	1.683	247.067	3	5600000	14000000	0.666667	0.333333	0.4	-0.403571
A0A0G2JUD9	Matrix metalloproteinase-9 OS=Rattus norvegicus GN=Mmp9 PE=4 SV=1	24.435	13	57	13	1	708	78.582	6.33	NA	5400000	5900000	15000000	NA	13000000	1.075	506.001	13	5650000	14000000	0.666667	0.666667	0.403571	-0.405479
Q63691	Monocyte differentiation antigen CD14 OS=Rattus norvegicus GN=Cd14 PE=2 SV=2	20.9677	6	55	6	1	372	40.029	5.52	9500000	12000000	8100000	20000000	15000000	38000000	1.069	1841.07	6	9.86667e+06	2.43333e+07	1	1	0.405479	-0.40625
Q71SA3	Thrombospondin 1 OS=Rattus norvegicus GN=Thbs1 PE=2 SV=1	30.1709	28	161	28	1	1170	129.588	4.97	8800000	8100000	9100000	39000000	12000000	13000000	1.236	3031.91	28	8.66667e+06	2.13333e+07	1	1	0.40625	-0.406667
Q7TP05	Da1-24 OS=Rattus norvegicus GN=Cfb PE=1 SV=1	36.2903	35	522	35	0	1116	123.96	7.11	41000000	73000000	69000000	220000000	130000000	100000000	3.187	8693.1	35	61000000	150000000	1	1	0.406667	-0.407547
R4I3Z7	Neutrophil cytosolic factor 2 OS=Rattus norvegicus GN=Ncf2 PE=2 SV=1	34.981	16	82	16	1	526	59.86	5.8	8300000	4500000	8800000	18000000	11000000	24000000	1.434	890.97	16	7200000	1.76667e+07	1	1	0.407547	-0.407767
A0A0G2JZI2	Protein Eprs OS=Rattus norvegicus GN=Eprs PE=1 SV=1	38.2937	44	611	43	1	1512	169.753	7.44	20000000	33000000	31000000	150000000	25000000	31000000	1.441	12675.9	44	28000000	6.86667e+07	1	1	0.407767	-0.409639
P55009	Allograft inflammatory factor 1 OS=Rattus norvegicus GN=Aif1 PE=2 SV=1	23.8095	3	34	3	1	147	16.817	8.27	NA	3600000	3800000	9100000	3000000	14000000	0.468	1038.41	3	3700000	8700000	0.666667	1	0.425287	-0.431818
P41565	Isocitrate dehydrogenase [NAD] subunit gamma 1, mitochondrial OS=Rattus norvegicus GN=Idh3g PE=1 SV=2	14.2494	6	62	6	1	393	42.824	8.9	6800000	6000000	10000000	NA	29000000	6200000	0.711	1090.04	6	7600000	17600000	1	0.666667	0.431818	-0.43508
Q62862	Dual specificity mitogen-activated protein kinase kinase 5 OS=Rattus norvegicus GN=Map2k5 PE=1 SV=1	1.5625	1	30	1	1	448	50.166	6.39	56000000	74000000	61000000	180000000	190000000	69000000	0.072	517.737	1	6.36667e+07	1.46333e+08	1	1	0.43508	-0.438202
P04638	Apolipoprotein A-II OS=Rattus norvegicus GN=Apoa2 PE=2 SV=1	30.3922	3	26	3	1	102	11.432	6.65	NA	NA	13000000	65000000	21000000	3000000	1.371	323.752	3	13000000	2.96667e+07	0.333333	1	0.438202	-0.438272
A0A0G2JZA7	Protein Tmem2 OS=Rattus norvegicus GN=Tmem2 PE=1 SV=1	4.69993	5	28	5	1	1383	153.857	7.8	1300000	3600000	2200000	5900000	NA	4900000	0.131	143.045	5	2.36667e+06	5400000	1	0.666667	0.438272	-0.439024
Q9ERL1	Cytochrome b-245, beta polypeptide, isoform CRA_a OS=Rattus norvegicus GN=Cybb PE=1 SV=2	31.0526	17	202	17	1	570	65.33	8.47	11000000	22000000	21000000	56000000	13000000	54000000	1.622	3830.37	17	18000000	41000000	1	1	0.439024	-0.441667
F1M944	Calsequestrin OS=Rattus norvegicus GN=Casq2 PE=1 SV=2	12.6464	5	12	5	1	427	49.372	4.31	NA	NA	5300000	NA	12000000	NA	0.532	100.725	5	5300000	12000000	0.333333	0.333333	0.441667	-0.451389
D3ZCH6	Protein Rnaset2 OS=Rattus norvegicus GN=Rnaset2 PE=1 SV=1	21.875	4	61	4	1	256	29.497	6.44	1800000	NA	4700000	6600000	5000000	10000000	1.154	1338.43	4	3250000	7200000	0.666667	1	0.451389	-0.4544
Q7TT49	Serine/threonine-protein kinase MRCK beta OS=Rattus norvegicus GN=Cdc42bpb PE=1 SV=1	3.61938	5	43	5	1	1713	194.765	6.46	34000000	5000000	3600000	57000000	NA	5500000	0.088	248.842	5	14200000	31250000	1	0.666667	0.4544	-0.454545
P14046	Alpha-1-inhibitor 3 OS=Rattus norvegicus GN=A1i3 PE=1 SV=1	44.4821	54	1700	1	1	1477	163.67	6.04	24000000	23000000	28000000	76000000	50000000	39000000	12.092	28296.4	54	25000000	55000000	1	1	0.454545	-0.457143
P62832	60S ribosomal protein L23 OS=Rattus norvegicus GN=Rpl23 PE=2 SV=1	37.8571	4	74	4	1	140	14.856	10.51	11000000	11000000	11000000	17000000	11000000	44000000	1.848	1070.3	4	11000000	24000000	1	1	0.458333	-0.457143
M0RBP7	Uncharacterized protein OS=Rattus norvegicus PE=4 SV=1	13.5593	2	24	2	1	118	12.776	6.51	NA	15000000	17000000	41000000	54000000	10000000	0.931	317.32	2	16000000	35000000	0.666667	1	0.457143	-0.458333
F7F389	Complement component C9 OS=Rattus norvegicus GN=C9 PE=1 SV=1	34.3103	21	275	21	1	580	65.243	6.1	24000000	29000000	27000000	87000000	62000000	26000000	2.415	4974.11	21	2.66667e+07	5.83333e+07	1	1	0.457143	-0.459433
Q4QQV4	Dead end homolog 1 (Zebrafish) OS=Rattus norvegicus GN=Hars PE=1 SV=1	37.7953	18	197	18	1	508	57.324	6.11	15000000	18000000	14000000	8300000	83000000	11000000	1.537	2176.17	18	1.56667e+07	34100000	1	1	0.459433	-0.460432
Q91YB6	Complement inhibitory factor H OS=Rattus norvegicus GN=Cfh PE=2 SV=1	48.301	44	422	43	1	1236	140.252	6.87	24000000	22000000	18000000	81000000	44000000	14000000	3.885	5821.5	44	2.13333e+07	4.63333e+07	1	1	0.460432	-0.460526
P02767	Transthyretin OS=Rattus norvegicus GN=Ttr PE=1 SV=1	63.2653	7	218	7	1	147	15.71	6.16	45000000	66000000	64000000	150000000	170000000	60000000	5.813	3703.08	7	5.83333e+07	1.26667e+08	1	1	0.460526	-0.461538
Q62669	Protein Hbb-b1 OS=Rattus norvegicus GN=LOC103694855 PE=1 SV=1	85.034	12	698	3	0	147	16.012	8.19	600000000	320000000	500000000	900000000	1900000000	260000000	40.246	14153.7	12	4.73333e+08	1020000000	1	1	0.464052	-0.461538
D3ZF92	Tumor necrosis factor receptor superfamily member 21 OS=Rattus norvegicus GN=Tnfrsf21 PE=1 SV=1	3.05344	1	4	1	1	655	71.824	7.37	3200000	NA	5800000	11000000	8500000	NA	0.05	0	1	4500000	9750000	0.666667	0.666667	0.461538	-0.464052
Q5FVH2	Phospholipase D3 OS=Rattus norvegicus GN=Pld3 PE=2 SV=1	11.2705	4	44	4	1	488	54.364	6.52	3300000	1900000	2000000	4500000	3100000	8000000	0.389	972.039	4	2400000	5200000	1	1	0.461538	-0.464286
Q5PPL3	Sterol-4-alpha-carboxylate 3-dehydrogenase, decarboxylating OS=Rattus norvegicus GN=Nsdhl PE=2 SV=1	12.9834	3	13	3	1	362	40.386	8.85	1300000	NA	NA	NA	1900000	3700000	0.28	143.365	3	1300000	2800000	0.333333	0.666667	0.464286	-0.464419
Q5U1Y2	Protein Rac2 OS=Rattus norvegicus GN=Rac2 PE=1 SV=1	40.625	8	257	3	1	192	21.427	7.61	28000000	29000000	67000000	91000000	46000000	130000000	4.878	4008.45	8	4.13333e+07	89000000	1	1	0.464419	-0.465455
B2LYI9	Tenascin C OS=Rattus norvegicus GN=Tnc PE=2 SV=1	17.3353	26	79	20	1	2019	221.611	4.91	NA	NA	6400000	7500000	NA	20000000	0.704	1279.98	26	6400000	13750000	0.333333	0.666667	0.465455	-0.465789
P84586	RNA-binding motif protein, X chromosome retrogene-like OS=Rattus norvegicus GN=Rbmxrtl PE=1 SV=1	29.1237	13	189	5	1	388	42.178	9.99	13000000	NA	4700000	NA	NA	19000000	1.119	2206.12	13	8850000	19000000	0.666667	0.333333	0.465789	-0.465909
Q6PDU6	Beta-glo OS=Rattus norvegicus GN=Hbb-b1 PE=2 SV=1	93.1973	12	745	3	1	147	16.027	7.3	350000000	180000000	290000000	510000000	1100000000	150000000	40.246	14891.8	12	2.73333e+08	5.86667e+08	1	1	0.465909	-0.467532
D3ZDB9	NmrA-like family domain-containing protein 1 OS=Rattus norvegicus GN=Nmral1 PE=1 SV=2	8.85246	2	6	2	1	305	33.93	6.62	1800000	NA	NA	2200000	NA	5500000	0.194	28.8766	2	1800000	3850000	0.333333	0.666667	0.467532	-0.468085
A0A0G2K785	Glycerol kinase OS=Rattus norvegicus GN=Gk PE=1 SV=1	19.4991	9	40	9	1	559	61.193	5.9	NA	4000000	4800000	7800000	NA	11000000	0.833	413.052	9	4400000	9400000	0.666667	0.666667	0.468085	-0.46875
F1LPQ6	Protein Ighm OS=Rattus norvegicus GN=Ighm PE=4 SV=2	24.359	8	222	5	0	468	51.637	6.77	13000000	36000000	56000000	87000000	100000000	37000000	3.217	4366.2	8	35000000	7.46667e+07	1	1	0.46875	-0.471014
P11517	Hemoglobin subunit beta-2 OS=Rattus norvegicus PE=1 SV=2	85.034	14	1423	2	1	147	15.972	8.79	270000000	150000000	230000000	420000000	840000000	120000000	162.789	24950.8	14	2.16667e+08	460000000	1	1	0.471014	-0.473214
A0A0G2K477	Protein Ighm OS=Rattus norvegicus GN=Ighm PE=4 SV=1	30.0429	9	238	7	0	466	51.104	7.74	14000000	36000000	56000000	87000000	100000000	37000000	2.29	4660.41	9	3.53333e+07	7.46667e+07	1	1	0.473214	-0.474201
Q4V7C6	GMP synthase [glutamine-hydrolyzing] OS=Rattus norvegicus GN=Gmps PE=1 SV=1	20.3463	11	74	11	1	693	76.709	6.64	5800000	6700000	6800000	4600000	5100000	31000000	0.743	654.771	11	6.43333e+06	1.35667e+07	1	1	0.474201	-0.474576
P28042	Single-stranded DNA-binding protein, mitochondrial OS=Rattus norvegicus GN=Ssbp1 PE=1 SV=2	27.8146	3	20	3	1	151	17.444	9.83	3600000	2000000	NA	NA	NA	5900000	0.719	263.073	3	2800000	5900000	0.666667	0.333333	0.474576	-0.475
G3V8B0	Myosin-7 OS=Rattus norvegicus GN=Myh7 PE=1 SV=1	49.7158	95	598	11	1	1935	222.762	5.76	NA	NA	38000000	NA	80000000	NA	4.456	12589.1	95	38000000	80000000	0.333333	0.333333	0.475	-0.475162
F2Z3T4	Muscleblind-like protein 2 OS=Rattus norvegicus GN=Mbnl2 PE=1 SV=1	11.7962	5	106	1	1	373	40.13	9	NA	11000000	NA	3300000	NA	43000000	1.404	472.555	5	11000000	23150000	0.333333	0.666667	0.475162	-0.476451
M0R8W9	Protein LOC100909700 OS=Rattus norvegicus GN=LOC100909700 PE=4 SV=1	42.735	20	133	1	1	819	86.834	5.87	NA	14000000	15000000	39000000	9300000	43000000	1.825	2642.57	20	14500000	3.04333e+07	0.666667	1	0.476451	-0.478114
P12346	Serotransferrin OS=Rattus norvegicus GN=Tf PE=1 SV=3	64.1834	40	2942	1	1	698	76.346	7.28	410000000	550000000	460000000	1200000000	1300000000	470000000	22.462	65365.3	40	4.73333e+08	990000000	1	1	0.478114	-0.48
A0A0G2K3G0	Histidine-rich glycoprotein OS=Rattus norvegicus GN=Hrg PE=1 SV=1	26.306	15	244	15	1	536	60.331	7.83	25000000	37000000	46000000	100000000	97000000	28000000	2.371	2985.92	15	36000000	75000000	1	1	0.48	-0.481481
D3ZER6	Protein Tnpo2 OS=Rattus norvegicus GN=Tnpo2 PE=1 SV=2	11.2815	9	86	4	1	913	102.81	5	2500000	4200000	5000000	NA	NA	8100000	0.458	1104.67	9	3900000	8100000	1	0.333333	0.481481	-0.481959
D3ZZ95	60S ribosomal protein L36 OS=Rattus norvegicus GN=LOC100361060 PE=3 SV=1	20.7547	3	34	3	1	106	12.402	11.66	11000000	4500000	3200000	14000000	7800000	17000000	1.783	1485.72	3	6.23333e+06	1.29333e+07	1	1	0.481959	-0.483384
P09811	Glycogen phosphorylase, liver form OS=Rattus norvegicus GN=Pygl PE=1 SV=5	31.5294	23	233	16	1	850	97.421	7.2	3900000	6200000	5900000	13000000	5100000	15000000	1.558	1636.14	23	5.33333e+06	1.10333e+07	1	1	0.483384	-0.486264
O35821	Myb-binding protein 1A OS=Rattus norvegicus GN=Mybbp1a PE=1 SV=2	16.2946	18	95	18	1	1344	152.191	8.95	5000000	6700000	6000000	16000000	7400000	13000000	0.622	2081.44	18	5900000	1.21333e+07	1	1	0.486264	-0.487179
B0BNN3	Carbonic anhydrase 1 OS=Rattus norvegicus GN=Ca1 PE=1 SV=1	60.9195	11	104	11	1	261	28.282	7.42	12000000	6900000	7100000	19000000	67000000	3600000	6.499	1549.5	11	8.66667e+06	2.98667e+07	1	1	0.290179	-0.590741
G3V8S9	Cathelicidin antimicrobial peptide OS=Rattus norvegicus GN=Camp PE=1 SV=1	42.2857	4	38	1	1	175	19.743	8.13	2200000	5500000	8000000	11000000	NA	25000000	1.054	2042.56	4	5.23333e+06	18000000	1	0.666667	0.290741	-0.590909
Q4KM66	LOC500183 protein OS=Rattus norvegicus GN=LOC500183 PE=1 SV=1	42.735	9	270	5	1	234	25.676	5.58	98000000	120000000	70000000	160000000	670000000	160000000	9	6642.82	9	96000000	330000000	1	1	0.290909	-0.591005
D3ZE00	Uncharacterized protein OS=Rattus norvegicus PE=4 SV=3	27.551	2	38	2	1	98	10.842	6.58	26000000	34000000	50000000	94000000	230000000	54000000	1.154	1362.56	2	3.66667e+07	126000000	1	1	0.291005	-0.594444
Q53Z83	Metallothionein OS=Rattus norvegicus GN=Mt1 PE=1 SV=1	55.7377	2	17	2	1	61	6.001	7.96	NA	5300000	NA	20000000	13000000	21000000	1.154	682.41	2	5300000	18000000	0.333333	1	0.294444	-0.598184
O54924	Exocyst complex component 8 OS=Rattus norvegicus GN=Exoc8 PE=1 SV=1	10.8939	6	22	6	1	716	80.992	5.4	NA	NA	1800000	NA	4900000	6400000	0.259	190.45	6	1800000	5650000	0.333333	0.666667	0.318584	-0.622368
D3ZIK1	Protein Lin28b OS=Rattus norvegicus GN=Lin28b PE=4 SV=1	3.69004	1	16	1	1	271	30.059	8.57	42000000	50000000	55000000	240000000	NA	64000000	0.105	28.2	1	49000000	152000000	1	0.666667	0.322368	-0.627381
G3V9R9	Afamin OS=Rattus norvegicus GN=Afm PE=1 SV=1	51.9737	30	377	30	1	608	69.196	6.21	16000000	21000000	18000000	83000000	64000000	21000000	4.878	4743.76	30	1.83333e+07	56000000	1	1	0.327381	-0.629787
P20411	High affinity immunoglobulin epsilon receptor subunit gamma OS=Rattus norvegicus GN=Fcer1g PE=1 SV=1	25.5814	3	22	3	1	86	9.758	6	NA	16000000	15000000	27000000	50000000	64000000	2.981	182.978	3	15500000	47000000	0.666667	1	0.329787	-0.630882
Q6P762	Alpha-mannosidase OS=Rattus norvegicus GN=Man2b1 PE=1 SV=1	8.6224	6	29	6	1	1009	114.255	8.66	NA	13000000	17000000	62000000	46000000	28000000	0.272	147.657	6	15000000	4.53333e+07	0.666667	1	0.330882	-0.630882
D3ZWD6	Complement component 8, alpha polypeptide (Predicted) OS=Rattus norvegicus GN=C8a PE=1 SV=1	18.0579	10	37	10	1	587	66.23	5.96	2600000	3100000	3300000	16000000	7700000	3500000	0.73	655.027	10	3000000	9.06667e+06	1	1	0.330882	-0.635025
D4A7X9	Myosin IF (Predicted) OS=Rattus norvegicus GN=Myo1f PE=1 SV=1	10.6557	11	128	6	1	1098	125.24	9.17	2300000	4100000	3500000	7700000	NA	12000000	0.334	1317.02	11	3300000	9850000	1	0.666667	0.335025	-0.637838
D4A5K6	Protein Zmpste24 OS=Rattus norvegicus GN=Zmpste24 PE=1 SV=1	12.2105	5	31	5	1	475	54.813	7.23	NA	NA	2500000	7400000	NA	NA	0.668	47.184	5	2500000	7400000	0.333333	0.333333	0.337838	-0.637931
F7FHF3	Protein Serpinf2 OS=Rattus norvegicus GN=Serpinf2 PE=1 SV=1	25.8123	10	71	10	1	554	62.252	6.8	12000000	11000000	11000000	47000000	20000000	16000000	1.246	2287.71	10	1.13333e+07	2.76667e+07	1	1	0.409639	-0.812281
G3V729	Bone marrow proteoglycan OS=Rattus norvegicus GN=Prg2 PE=1 SV=1	25.1101	5	76	5	1	227	25.145	6	29000000	31000000	34000000	NA	110000000	42000000	1.054	2478.19	5	3.13333e+07	76000000	1	0.666667	0.412281	-0.812371
D4A305	Coiled-coil domain containing 58 (Predicted), isoform CRA_c OS=Rattus norvegicus GN=Ccdc58 PE=1 SV=1	19.4444	2	14	2	1	144	16.68	8.16	NA	NA	2000000	NA	3200000	6500000	0.52	29.6099	2	2000000	4850000	0.333333	0.666667	0.412371	-0.8125
G3V615	Complement factor B, isoform CRA_b OS=Rattus norvegicus GN=Cfb PE=1 SV=1	49.1481	31	538	31	1	763	85.299	6.96	47000000	79000000	72000000	240000000	140000000	100000000	6.419	9367.91	31	66000000	160000000	1	1	0.4125	-0.818605
Q9WV57	Macrophage-expressed gene 1 protein OS=Rattus norvegicus GN=Mpeg1 PE=2 SV=2	9.80392	5	24	5	1	714	78.477	5.99	NA	2400000	NA	5600000	3300000	8300000	0.399	148.799	5	2400000	5.73333e+06	0.333333	1	0.418605	-0.821589
P42533	Tissue factor OS=Rattus norvegicus GN=F3 PE=2 SV=1	18.6441	5	32	5	1	295	33.423	9.8	NA	NA	6900000	18000000	9100000	22000000	0.738	853.889	5	6900000	1.63667e+07	0.333333	1	0.421589	-0.823913
Q63448	Peroxisomal acyl-coenzyme A oxidase 3 OS=Rattus norvegicus GN=Acox3 PE=1 SV=1	9	5	17	5	1	700	78.396	8.19	1800000	NA	2100000	5600000	NA	3600000	0.238	237.414	5	1950000	4600000	0.666667	0.666667	0.423913	-0.825287
P24090	Alpha-2-HS-glycoprotein OS=Rattus norvegicus GN=Ahsg PE=1 SV=2	47.7273	12	447	12	1	352	37.958	6.51	160000000	220000000	190000000	510000000	520000000	140000000	8.047	10546.2	12	190000000	390000000	1	1	0.487179	-0.96875
P02091	Hemoglobin subunit beta-1 OS=Rattus norvegicus GN=Hbb PE=1 SV=3	95.2381	15	1608	3	1	147	15.969	8.07	1400000000	760000000	1100000000	1900000000	4100000000	600000000	411.463	35060.9	15	1.08667e+09	2200000000	1	1	0.493939	-0.971014
A0A0G2JSS8	Peroxiredoxin 5, isoform CRA_c OS=Rattus norvegicus GN=Prdx5 PE=1 SV=1	35.6808	8	404	8	1	213	22.193	8.66	79000000	130000000	140000000	280000000	110000000	310000000	3.87	6568.59	8	1.16333e+08	2.33333e+08	1	1	0.498571	-0.973214
M0R9B5	Protein Mcpt8l2 OS=Rattus norvegicus GN=Mcpt8l2 PE=1 SV=1	12.5	3	9	1	1	248	27.518	8.9	NA	NA	3800000	NA	7600000	NA	0.468	45.7845	3	3800000	7600000	0.333333	0.333333	0.5	-0.974201
F1LWD0	Uncharacterized protein OS=Rattus norvegicus PE=1 SV=2	35.8491	3	27	3	1	106	11.913	8.46	NA	4200000	NA	9900000	8100000	7200000	1.154	624.3	3	4200000	8400000	0.333333	1	0.5	-0.974576
O35095	Neurochondrin OS=Rattus norvegicus GN=Ncdn PE=1 SV=2	5.34979	3	20	3	1	729	78.873	5.62	1500000	NA	1200000	NA	2700000	NA	0.212	71.497	3	1350000	2700000	0.666667	0.333333	0.5	-0.975455
